# Supplementary material for: Prospective multicentre cohort trial on acute appendicitis and microbiota, aetiology and effects of antimicrobial treatment: study protocol for the MAPPAC (Microbiology APPendicitis ACuta) trial
Source: PubMed Central journal article supplement — BMJ Open. 2019 Sep 6;9(9):e031137. doi: 10.1136/bmjopen-2019-031137 (PMC6731800; doi:10.1136/bmjopen-2019-031137), 2019-09-06
Supplement: bmjopen-2019-031137.draft_revisions.pdf [file bmjopen-2019-031137.draft_revisions.pdf]

# BMJ Open

BMJ Open is committed to open peer review. As part of this commitment we make the peer review history of every article we publish publicly available.

When an article is published we post the peer reviewers' comments and the authors' responses online. We also post the versions of the paper that were used during peer review. These are the versions that the peer review comments apply to.

The versions of the paper that follow are the versions that were submitted during the peer review process. They are not the versions of record or the final published versions. They should not be cited or distributed as the published version of this manuscript.

BMJ Open is an open access journal and the full, final, typeset and author-corrected version of record of the manuscript is available on our site with no access controls, subscription charges or pay-per-view fees (<http://bmjopen.bmj.com>).

If you have any questions on BMJ Open's open peer review process please email [info.bmjopen@bmj.com](mailto:info.bmjopen@bmj.com)

# BMJ Open

## Acute Appendicitis and Microbiota – Etiology and Effects of Antimicrobial Treatment: Study protocol for the MAPPAC (Microbiology Appendicitis Acuta) Trial

|                               |                                                                                                                                                                                                                                                                                                                                                                                                                                                                                                                                                                                                                                                                                                                                                                                                                                                                                                                                                                                                                                                                                                                                                                                                                                                                                                                                                       |
|-------------------------------|-------------------------------------------------------------------------------------------------------------------------------------------------------------------------------------------------------------------------------------------------------------------------------------------------------------------------------------------------------------------------------------------------------------------------------------------------------------------------------------------------------------------------------------------------------------------------------------------------------------------------------------------------------------------------------------------------------------------------------------------------------------------------------------------------------------------------------------------------------------------------------------------------------------------------------------------------------------------------------------------------------------------------------------------------------------------------------------------------------------------------------------------------------------------------------------------------------------------------------------------------------------------------------------------------------------------------------------------------------|
| Journal:                      | <i>BMJ Open</i>                                                                                                                                                                                                                                                                                                                                                                                                                                                                                                                                                                                                                                                                                                                                                                                                                                                                                                                                                                                                                                                                                                                                                                                                                                                                                                                                       |
| Manuscript ID                 | bmjopen-2019-031137                                                                                                                                                                                                                                                                                                                                                                                                                                                                                                                                                                                                                                                                                                                                                                                                                                                                                                                                                                                                                                                                                                                                                                                                                                                                                                                                   |
| Article Type:                 | Protocol                                                                                                                                                                                                                                                                                                                                                                                                                                                                                                                                                                                                                                                                                                                                                                                                                                                                                                                                                                                                                                                                                                                                                                                                                                                                                                                                              |
| Date Submitted by the Author: | 17-Apr-2019                                                                                                                                                                                                                                                                                                                                                                                                                                                                                                                                                                                                                                                                                                                                                                                                                                                                                                                                                                                                                                                                                                                                                                                                                                                                                                                                           |
| Complete List of Authors:     | <p>Vanhatalo, Sanja; University of Turku, Institute of Biomedicine, Research Center for Cancer, Infections and Immunity; Turku University Hospital, Division of Digestive Surgery and Urology</p> <p>Munukka, Eveliina; University of Turku Faculty of Medicine; Turku University Hospital, Department of Clinical Microbiology</p> <p>Sippola, Suvi; Turku University Hospital, Division of Digestive Surgery and Urology; University of Turku, Department of Surgery</p> <p>Jalkanen, Sirpa; University of Turku, Medicity and Institute of Biomedicine</p> <p>Grönroos, Juha; Turku University Hospital, Division of Digestive Surgery and Urology; University of Turku, Department of Surgery</p> <p>Marttila, Harri; Turku University Hospital, Department of Hospital Hygiene and Infection Control</p> <p>Eerola, Erkki; University of Turku, Institute of Biomedicine, Research Center for Cancer, Infections and Immunity; Turku University Hospital, Department of Clinical Microbiology</p> <p>Hurme, Saija; University of Turku, Department of Biostatistics</p> <p>Hakanen, Antti; University of Turku, Institute of Biomedicine, Research Center for Cancer, Infections and Immunity; Turku University Hospital, Department of Clinical Microbiology</p> <p>Salminen, Paulina; Turun Yliopisto, Surgery; Turku University Hospital,</p> |
| Keywords:                     | appendicitis, appendectomy, appendicitis etiology, appendicolith, microbiota, antimicrobial resistance                                                                                                                                                                                                                                                                                                                                                                                                                                                                                                                                                                                                                                                                                                                                                                                                                                                                                                                                                                                                                                                                                                                                                                                                                                                |
|                               |                                                                                                                                                                                                                                                                                                                                                                                                                                                                                                                                                                                                                                                                                                                                                                                                                                                                                                                                                                                                                                                                                                                                                                                                                                                                                                                                                       |

SCHOLARONE™  
Manuscripts

1  
2  
3  
4  
5  
6  
7  
8  
9  
10  
11  
12  
13  
14  
15  
16  
17  
18  
19  
20  
21  
22  
23  
24  
25  
26  
27  
28  
29  
30  
31  
32  
33  
34  
35  
36  
37  
38  
39  
40  
41  
42  
43  
44  
45  
46  
47  
48  
49  
50  
51  
52  
53  
54  
55  
56  
57  
58  
59  
601  
2  
3  
4  
5  
6  
7  
8  
9  
10  
11  
12  
13  
14  
15  
16  
17  
18  
19  
20  
21  
22  
23  
24  
25  
26  
27  
28  
29  
30  
31  
32  
33  
34  
35  
36  
37  
38  
39  
40  
41  
42  
43  
44  
45  
46  
47  
48  
49  
50  
51  
52  
53  
54  
55  
56  
57  
58  
59  
60**Acute Appendicitis and Microbiota – Etiology and Effects of Antimicrobial Treatment:****Study protocol for the MAPPAC (Microbiology Appendicitis Acuta) Trial**

Vanhatalo S., MSc <sup>1,2</sup>, Munukka E., PhD <sup>3,4</sup>, Sippola S., MD <sup>2,5</sup>, Jalkanen S., MD, PhD <sup>6</sup>, Grönroos J., MD, PhD <sup>2,5</sup>, Marttila H., MD, PhD <sup>7</sup>, Eerola E., MD, PhD <sup>1,4</sup>, Hurme S., MSc <sup>8</sup>, Hakanen A.J., MD, PhD <sup>1,4</sup>, Salminen P., MD, PhD <sup>2,5,9</sup>

1. Research Center for Cancer, Infections and Immunity, Institute of Biomedicine, University of Turku, Finland
2. Division of Digestive Surgery and Urology, Turku University Hospital, Turku, Finland
3. Faculty of Medicine, University of Turku, Finland
4. Department of Clinical Microbiology, Turku University Hospital, Finland
5. Department of Surgery, University of Turku, Turku, Finland
6. MediCity and Institute of Biomedicine, University of Turku
7. Department of Hospital Hygiene and Infection Control, Turku University Hospital, Turku, Finland
8. Department of Biostatistics, University of Turku, Turku, Finland
9. Satakunta Central Hospital, Pori, Finland

**Correspondence:**

Paulina Salminen, MD, PhD  
Division of Digestive Surgery and Urology  
Turku University Hospital  
Kiinamyllynkatu 4-8, 20520 Turku, Finland  
Tel. +358 2 313 0542, +358 40 718 1896  
Fax. +358 2 313 2284  
E-mail: [paulina.salminen@tyks.fi](mailto:paulina.salminen@tyks.fi)

Word count: 4479

1  
2  
3 34  
45 35 **ABSTRACT**

6  
7  
8 36 **Introduction:** Based on epidemiological and clinical data acute appendicitis can present either  
9  
10 37 as uncomplicated or complicated. Recent studies have shown the safety, efficacy and cost-  
11  
12 38 effectiveness of antibiotics for CT-confirmed uncomplicated acute appendicitis. The etiology of  
13  
14 39 these different appendicitis forms remains unknown. Complicated acute appendicitis most  
15  
16 40 often requires emergency appendectomy. Despite appendicitis being one of the most common  
17  
18 41 surgical emergencies, there are very few reports on appendicitis etiology and pathophysiology  
19  
20 42 focusing on the differences between uncomplicated and complicated appendicitis. MAPPAC  
21  
22 43 trial aims to evaluate microbiological etiology of these different forms also assessing both  
23  
24 44 antibiotics non-responders and recurrent appendicitis after successful antibiotic treatment.  
25  
26 45 MAPPAC also aims to determine antibiotic and placebo effects on gut microbiota composition  
27  
28 46 and antimicrobial resistance.

29 47 **Methods and analysis:** MAPPAC is a prospective clinical trial with both single- and multicentre  
30  
31 48 arm conducted in close synergy with concurrent trials APPAC II (p.o. vs. i.v+p.o. antibiotics,  
32  
33 49 NCT03236961) and APPAC III (double-blind trial placebo vs. antibiotics, NCT03234296)  
34  
35 50 randomized clinical trials further aiming to optimise the non-operative treatment of  
36  
37 51 uncomplicated acute appendicitis. Based on the enrolment for these trials, patients with CT-  
38  
39 52 confirmed uncomplicated acute appendicitis are recruited also to the MAPPAC study. In  
40  
41 53 addition to conservatively treated uncomplicated acute appendicitis patients, MAPPAC will  
42  
43 54 recruit patients with uncomplicated and complicated appendicitis undergoing appendectomy.  
44  
45 55 Rectal and appendiceal swabs, appendicolith, faecal, and serum samples, appendiceal biopsies,  
46  
47 56 and clinical data are collected during the hospital stay for microbiological and immunological  
48  
49 57 analysis in both study arms with the longitudinal study arm collecting samples also during  
50  
51 58 follow-up up to 12 months after appendicitis treatment.  
52  
53  
54  
55  
56  
57  
58  
59  
60

1  
2  
3 59 **Ethics and dissemination:** This study has been approved by the Ethics Committee of the  
4  
5 60 Hospital District of Southwest Finland (Turku University Hospital) and the Finnish Medicines  
6  
7  
8 61 Agency (Fimea). Results of the trial will be published in peer-reviewed journals.  
9

10 62 **Trial registration:** Eudra-CT: 2016-003655-29 (2017-01-12), [clinicaltrials.gov](http://clinicaltrials.gov) NCT03257423.  
11  
12  
13 63  
14  
15 64

16 65 **KEYWORDS**

17  
18 66 Appendicitis, appendectomy, appendicitis etiology, appendicolith, microbiota, antimicrobial  
19  
20  
21 67 resistance  
22  
23 68  
24  
25 69  
26 70  
27  
28  
29  
30  
31  
32  
33  
34  
35  
36  
37  
38  
39  
40  
41  
42  
43  
44  
45  
46  
47  
48  
49  
50  
51  
52  
53  
54  
55  
56  
57  
58  
59  
60

## 71 **Strengths and limitations of this study**

- 72 - To our knowledge, MAPPAC (Microbiology APPendicitis ACuta) is the first prospective  
73 trial assessing the role of microbiology and immunology in the etiology of acute  
74 appendicitis in a large patient cohort consisting of CT-diagnosed uncomplicated and  
75 complicated acute appendicitis patients also specifically evaluating microbiological and  
76 immunological aspects of appendicoliths and recurrent appendicitis after initial  
77 successful conservative treatment.
- 78 - The strong synergy between two ongoing randomized clinical trials (APPAC II and  
79 APPAC III) enabling a large prospective patient cohort of acute appendicitis patients  
80 with associated clinical data to be assessed with the microbiological and immunological  
81 findings.
- 82 - The application of next generation sequencing combined with traditional culturing  
83 methods will provide reliable information about the microbiological factors in the  
84 etiology of complicated and uncomplicated acute appendicitis
- 85 - The comprehensive approach of the MAPPAC study acquiring a large set of samples in  
86 the emergency surgery setting presents a challenge to surgeons on call and some  
87 patients may not have all study samples available.

## 96 INTRODUCTION

97 Acute appendicitis is one of the most common causes of abdominal pain in emergency  
98 departments. The lifetime risk of acute appendicitis in males is 8.6% and 6.7% in females [1]  
99 with recent meta-analysis showing an increasing trend in appendicitis incidence in the  
100 industrialised countries [2]. Appendectomy has unquestionably been the standard treatment  
101 for acute appendicitis for over a century with more than 300 000 appendectomies performed  
102 annually in the United States [3]. Although appendectomy is generally well tolerated, it is a  
103 major surgical intervention potentially associated with postoperative morbidity [4-6]. Based  
104 on epidemiological and clinical data, acute appendicitis can present either as uncomplicated  
105 or complicated with the majority of cases being uncomplicated. Increasing amount of evidence  
106 shows that the majority of patients with uncomplicated acute appendicitis may be treated  
107 with antibiotics alone instead of surgery [7-13]. The original APPAC (APPendicitis ACuta) trial  
108 reported that at long-term follow-up, the majority of patients with computed tomography  
109 (CT) confirmed uncomplicated acute appendicitis were successfully treated with antibiotics,  
110 and those patients that required later appendectomy did not have increased or major  
111 complications [10, 14]. Antibiotics alone is an efficient and a safe first-line treatment for CT-  
112 confirmed uncomplicated acute appendicitis [8, 15-17]. In addition to decreased morbidity,  
113 antibiotic therapy was shown to offer significant cost savings compared to surgery [18].  
114 The different epidemiological trends of uncomplicated and complicated acute appendicitis  
115 indicate different pathophysiology [3]. Despite the high incidence of acute appendicitis, there  
116 are very few reports on appendicitis etiology and pathophysiology especially focusing on the  
117 possible differences between uncomplicated and complicated acute appendicitis. Complicated  
118 acute appendicitis, defined as a finding of perforation, appendicolith, abscess or a suspicion of  
119 tumor, requires emergency appendectomy. Appendicolith is a calcified faecal concretion in  
120 the appendix and it is the most common form of complicated acute appendicitis. Even though

1  
2  
3  
4  
5  
6  
7  
8  
9  
10  
11  
12  
13  
14  
15  
16  
17  
18  
19  
20  
21  
22  
23  
24  
25  
26  
27  
28  
29  
30  
31  
32  
33  
34  
35  
36  
37  
38  
39  
40  
41  
42  
43  
44  
45  
46  
47  
48  
49  
50  
51  
52  
53  
54  
55  
56  
57  
58  
59  
60

121 the first thorough study on appendicoliths was already reported in 1966 [19], information  
122 about appendiceal calculi is scarce. Obstruction of the appendiceal lumen caused by an  
123 appendicolith, lymphoid hyperplasia, or swelling has been evaluated to be the primary cause  
124 of appendicitis and bacterial overgrowth has been considered a consequence [20]. However,  
125 bacterial infection has also been proposed as the primary cause of appendicitis [21, 22].  
126 *Bacteroides* species are reported to be one of most common bacterial findings in appendicitis  
127 [23, 24]. Further, certain members of the *Fusobacteria*, especially *F. nucleatum* and *F.*  
128 *necrophorum*, are present in most appendicitis samples [21]. The most common aerobic  
129 bacteria organism detected by culturing is *Escherichia coli*, but also *Klebsiella pneumoniae*,  
130 *Streptococcus spp.*, *Enterococcus spp.* and *Pseudomonas aeruginosa* have been reported [25,  
131 26]. To our knowledge, only one study with a very small number of patients has characterised  
132 the adult appendiceal microbiota with next generation sequencing (NGS) methods. Appendix  
133 seems to have diverse microbiota including both commensal species from gut microbiota  
134 (GM) and opportunistic pathogens [27]. Since the interindividual variability in the microbial  
135 composition of the appendix samples is high [27], a larger number of appendicitis patients is  
136 needed to draw conclusions.

137 Antimicrobials decrease GM diversity, richness and species variation, and cause a perturbation  
138 in its overall balance. Particularly broad-spectrum antibiotics have been shown to have a long-  
139 term effect on GM. [31, 32] A prolonged disturbance in GM and the following imbalance with  
140 the host and its immune system have been associated with a variety of diseases, such as  
141 inflammatory bowel disease [33] and type 2 diabetes [34]. Antibiotic use can further lead to  
142 increased prevalence of antibiotic resistant bacteria and antibiotic resistance genes [35-37].  
143 Although the effects of antibiotic treatment on the AMR development is less clear in countries  
144 with lower prevalence of resistant bacteria [38, 39], the evaluation of antibiotic treatment  
145 effects on GM is essential in the treatment of acute appendicitis.



1  
2  
3 146 The MAPPAC (Microbiology APPendicitis ACuta) trial patient enrolment is based on the  
4  
5 147 ongoing APPAC II and APPAC III randomised multicentre clinical trials of our study group.  
6  
7  
8 148 APPAC II trial aims to optimise antibiotic treatment for CT confirmed uncomplicated acute  
9  
10 149 appendicitis in order to both shorten the hospital stay and restrict the antibacterial spectrum.  
11  
12 150 The APPAC III trial aims to assess symptomatic treatment of uncomplicated acute appendicitis  
13  
14  
15 151 and the role of antibiotics in the resolution of uncomplicated appendicitis. To our knowledge,  
16  
17 152 there are so far no similar large microbiological studies focusing on acute appendicitis  
18  
19  
20 153 performed in conjunction with large clinical trials with prospective access to both  
21  
22 154 uncomplicated and complicated appendicitis patients.  
23  
24

25 155 MAPPAC trial aims to evaluate the possible role and differences in the microbiological etiology  
26  
27  
28 156 of complicated and uncomplicated appendicitis with a special reference to the presence of an  
29  
30 157 appendicolith. In addition, MAPPAC aims to evaluate the immunological and microbiological  
31  
32  
33 158 factors involved in appendicitis recurrence after successful initial antibiotic therapy. In the  
34  
35 159 longitudinal study arm we also aim to assess the effects of antibiotic and placebo treatment on  
36  
37 160 the GM profile and the effects of hospital stay duration on the AMR reservoir of the GM.  
38  
39  
40

41 161

42  
43  
44 162

45  
46  
47 163

48  
49  
50  
51 164

52  
53  
54 165

55  
56  
57 166

58  
59  
60

## 167 **METHODS AND ANALYSIS**

### 168 **Study Design**

169 MAPPAC is a prospective clinical trial with a single-centre and a multicentre arm. The single-  
170 centre study arm at Turku University Hospital, aims to determine the possible differences in  
171 the etiology of complicated and uncomplicated acute appendicitis with a special reference to  
172 the role and etiology of appendicolith. In the multi-centre longitudinal arm, MAPPAC trial  
173 concentrates on assessment of possible immunological and microbiological factors involved  
174 in initial non-responders or appendicitis recurrence after successful initial antibiotic therapy  
175 at long-term follow-up. In this longitudinal multicentre study arm we also aim to evaluate the  
176 effects of antibiotic and placebo treatment on the GM and the effects of the duration of the  
177 hospital stay on the possible AMR reservoir within the GM. MAPPAC protocol was drafted in  
178 accordance with the SPIRIT statement [40]. The trial has been registered at both EudraCT  
179 (2016-003655-29) and clinicaltrials.gov (NCT03257423).

180 The three ongoing study entities (APPAC II, APPAC III, and MAPPAC) are strongly  
181 interconnected having a common study aim and a patient enrolment population (Figure 1).  
182 APPAC II trial is a randomised open-label, non-inferiority multicentre trial to compare  
183 intravenous antibiotic therapy followed by per oral (p.o.) antibiotics with p.o. monotherapy  
184 in the treatment of uncomplicated acute appendicitis (NCT03236961)[41]. APPAC III trial is a  
185 randomised double-blind, placebo-controlled, superiority multicentre study to compare  
186 antibiotic therapy with placebo in the treatment of uncomplicated acute appendicitis  
187 (NCT03234296) [42]. All incoming patients are informed of all ongoing trials. Enrolment will  
188 be based firstly on the time of the day (availability of the hospital pharmacy services for the  
189 double-blinding) and secondly on patient preference (patient unwilling to participate in  
190 APPAC III, will be informed and invited to participate in APPAC II). During all hours, patients  
191 will be invited to participate in APPAC II trial. All patients invited to participate in APPAC II

1  
2  
3 192 and III trials will be invited to participate in the MAPPAC trial. Patients recruited for the  
4  
5 193 APPAC II or III trial are asked to sign a separate consent form for the MAPPAC trial allowing  
6  
7  
8 194 for the use of their data and collection of microbiological samples. The study flow is illustrated  
9  
10 195 in Figure 2.

11  
12  
13 196

### 14 15 197 **Patient selection**

16  
17 198 Eligible for inclusion are all adult patients 18 – 60 years old admitted to the emergency  
18  
19  
20 199 department with suspected acute appendicitis in whom a CT-confirmed uncomplicated or  
21  
22 200 complicated appendicitis is diagnosed or patients presenting with a suspected recurrent  
23  
24 201 appendicitis after initial successful antibiotic therapy for uncomplicated acute appendicitis.  
25  
26 202 The optimized low-dose and standard CT protocols from our OPTICAP trial [43] are used at  
27  
28  
29 203 all trial hospitals. MAPPAC single-centre arm will enroll patients with both uncomplicated  
30  
31 204 (both APPAC II and III trials and patients declining to participate in these trials undergoing  
32  
33  
34 205 appendectomy) and complicated acute appendicitis (patients excluded from APPAC II and  
35  
36 206 APPAC III trials) at Turku University Hospital. The enrolment of uncomplicated acute  
37  
38 207 appendicitis patients participating in the APPAC III trials will be performed at all APPAC III  
39  
40  
41 208 hospitals (all five Finnish university hospitals: Turku, Helsinki, Tampere, Oulu, and Kuopio).  
42  
43 209 In addition, all of the APPAC II and III trial patients having to undergo appendectomy either  
44  
45 210 for a treatment failure during the primary hospitalisation or for suspected recurrence after a  
46  
47  
48 211 successful initial non-operative treatment will be enrolled in the MAPPAC trial at all ten study  
49  
50 212 hospitals (all five university and five central hospitals in Finland: Jyväskylä, Pori, Mikkeli,  
51  
52 213 Seinäjoki and Rovaniemi).

53  
54  
55 214 All adult patients with a clinical suspicion of acute appendicitis will be studied carefully by  
56  
57 215 attending surgeons at the emergency departments of the participating hospitals. Clinical  
58  
59 216 history, physical investigation, and laboratory tests are evaluated and if these indicate acute

1  
2  
3  
4  
5  
6  
7  
8  
9  
10  
11  
12  
13  
14  
15  
16  
17  
18  
19  
20  
21  
22  
23  
24  
25  
26  
27  
28  
29  
30  
31  
32  
33  
34  
35  
36  
37  
38  
39  
40  
41  
42  
43  
44  
45  
46  
47  
48  
49  
50  
51  
52  
53  
54  
55  
56  
57  
58  
59  
60

217 appendicitis, the patient will undergo CT imaging with either optimised low-dose (BMI<30  
218 kg/m<sup>2</sup>) or standard CT (BMI>30kg/m<sup>2</sup>).

#### 220 Inclusion criteria

221 MAPPAC inclusion criteria follow mainly the criteria of APPAC II and APPAC III trials enrolling  
222 patients with CT-confirmed uncomplicated acute appendicitis. In addition, MAPPAC includes  
223 patients with complicated acute appendicitis and patients under or over the age limit of 18 to  
224 60 years of the APPAC II and APPAC III trials in the single-centre study arm at Turku  
225 University Hospital. Inclusion criteria: signed informed consent, CT scan confirmed diagnosis  
226 of either uncomplicated acute appendicitis or complicated acute appendicitis (appendicolith,  
227 perforation, abscess, suspicion of a tumor), suspected treatment failure of antibiotic therapy  
228 for uncomplicated acute appendicitis during the primary hospitalisation of APPAC II or III  
229 patients, and suspected recurrent appendicitis after a successful initial antibiotic therapy for  
230 uncomplicated acute appendicitis. Patients with uncomplicated acute appendicitis  
231 undergoing appendectomy based on the inclusion criteria and declining to participate in the  
232 APPAC II or III trials, may also be enrolled in the MAPPAC trial.

#### 233 Exclusion criteria

234 MAPPAC exclusion criteria for the patients with uncomplicated acute appendicitis undergoing  
235 antibiotic therapy are the same as in APPAC II and III trials: pregnancy or lactating, allergy to  
236 contrast media or iodine, allergy or contraindication to antibiotic therapy, renal insufficiency,  
237 metformine medication, severe systemic illness such as malignancy, medical condition  
238 requiring immunosuppressant medications, inability to co-operate and give informed  
239 consent. Diagnostic criteria for uncomplicated acute appendicitis at CT include appendiceal  
240 diameter exceeding 6 mm with wall thickening and at least 1 of the following (abnormal  
241 contrast enhancement of the appendiceal wall, inflammatory edema or minor fluid collection

1  
2  
3 242 around the appendix). CT criteria for complicated acute appendicitis include appendicolith (>  
4  
5 243 3mm stone within the appendix), abscess (periappendiceal walled of collection with  
6  
7  
8 244 enhancing walls), perforation (appendiceal wall enhancement defect and  
9  
10 245 periappendiceal excess of fluid and/or infectious phlegmon and/or extraluminal air), or  
11  
12 246 tumor suspicion (tumor-like prominence of the appendix).  
13  
14

15 247

16

### 17 248 **Study setting and feasibility**

18  
19 249 The study was initiated at Turku University Hospital in April 2017, with the study  
20  
21  
22 250 commencing at all study centres by fall 2017. The majority of MAPPAC patient enrolment is  
23  
24 251 evaluated to be completed in conjunction with the APPAC II and III trials latest by fall 2020.  
25  
26 252 Patient recruitment in the MAPPAC trial will continue for a minimum of five years after APPAC  
27  
28  
29 253 II and III trial enrolment completion based on the planned microbiological assessment of late  
30  
31 254 appendicitis recurrence.  
32

33

34 255

35

### 36 256 **Interventional groups**

37

38 257 Four interventional groups within MAPPAC are defined as follows:

39

40

41 258 1. Patients with uncomplicated acute appendicitis participating in the APPAC II trial at  
42  
43 259 Turku University Hospital (MAPPAC single-centre treatment arm) receiving either i.v.  
44  
45 260 antibiotic therapy followed by p.o. antibiotics (i.v. + p.o.) or patients receiving p.o.  
46  
47  
48 261 antibiotic monotherapy (p.o.). *I.v. + p.o.* group receives intravenous ertapenem 1 g once  
49  
50 262 daily for two days followed by p.o. levofloxacin 500 mg once daily and metronidazole  
51  
52 263 500 mg three times per day for 5 days. *P.o.* group receives *p.o.* moxifloxacin 400 mg  
53  
54  
55 264 once daily for seven days.  
56

57 265

58

59 266

60 266 2. Patients with uncomplicated acute appendicitis participating in the double-blinded  
APPAC III trial at all five university hospitals (MAPPAC multicentre treatment arm)

1  
2  
3 267 receiving either antibiotic therapy or placebo treatment. *Antibiotic treatment* is  
4  
5 268 intravenous ertapenem 1 g once per day for three days followed by p.o. levofloxacin  
6  
7  
8 269 500 mg once per day and metronidazole 500 mg three times per day for four days.  
9  
10 270 *Placebo treatment* entails intravenous placebo once per day for three days followed by  
11  
12 271 per oral placebo three times per day for four days.

- 13  
14  
15 272 3. Patients with uncomplicated acute appendicitis or suspected recurrent appendicitis  
16  
17 273 undergoing appendectomy

18  
19  
20 274 The patients in this group will undergo laparoscopic appendectomy either after  
21  
22 275 declining to participate in the APPAC II or APPAC III trials (MAPPAC single-centre  
23  
24 276 treatment arm at Turku University Hospital) or after suspected treatment failure of  
25  
26  
27 277 non-operative treatment or after presenting with suspected appendicitis recurrence  
28  
29 278 after initial successful non-operative treatment (MAPPAC multicentre treatment arm,  
30  
31 279 all APPAC II and APPAC III hospitals)

- 32  
33  
34 280 4. Patients with complicated acute appendicitis undergoing appendectomy

35  
36 281 The patients in this group will undergo laparoscopic appendectomy and are eligible for  
37  
38 282 enrolment only in the MAPPAC single-centre study arm at Turku University Hospital.  
39  
40  
41 283

### 42 43 284 **Sample collection**

44  
45 285 **Rectal swabs** are collected from all patients in the emergency department prior to antibiotic  
46  
47  
48 286 treatment or surgery (timepoint 0). Further, rectal swabs are collected on the 1<sup>st</sup> day for  
49  
50 287 APPAC II patients and for APPAC III patients on the 1<sup>st</sup> day (Turku University Hospital) and  
51  
52 288 on the 3<sup>rd</sup> day (all five university hospitals). At each time point, two rectal swabs are collected:  
53  
54  
55 289 Amies-Coal transport swab for culturing methods (Sarstedt, Nümbrecht, Germany) and  
56  
57 290 Puritan DNA/RNA swab (Puritan Medical products, Guilford, Maine) with shield fluid (Zymo  
58  
59  
60

1  
2  
3 291 Research, Irvine, Canada) for microbial DNA extraction. The shield fluid in this collection tube  
4  
5 292 allows the transportation at room temperature.

7  
8 293 **Samples from the appendix** are collected from patients undergoing appendectomy for  
9  
10 294 complicated or uncomplicated acute appendicitis and from patients with suspected disease  
11  
12 295 progression during the primary hospitalisation or appendicitis recurrence after successful  
13  
14  
15 296 initial non-operative therapy. Samples include routine histology as well as specific trial swabs  
16  
17 297 and biopsies. The appendix is opened vertically with a sterile scalpel and two swabs are taken  
18  
19  
20 298 similar to the rectal swab (one for culture and one for DNA extraction). Three biopsies are  
21  
22 299 taken at a distance of approximately 2 cm from the base of the appendix. All biopsies are  
23  
24 300 stored at -75 °C, one immediately and the rest two are first embedded in RNAlater solution  
25  
26 301 (Thermo Fisher Scientific, Waltham, MA, USA). Possible appendicoliths are collected into a  
27  
28  
29 302 sterile container, frozen and stored at -75 °C. If appendectomy is performed during office  
30  
31  
32 303 hours, appendiceal samples are collected by study personnel and an additional swab for  
33  
34 304 anaerobic culture is then collected and cultured in connection with collection and  
35  
36 305 immediately transferred into an anaerobic jar. During on call hours, the samples are collected  
37  
38  
39 306 by surgeons and the -75 °C appendiceal biopsy may not be collected. These appendiceal  
40  
41 307 samples are collected only in the Turku University Hospital and at the other study hospitals  
42  
43 308 only a swab sample (transport tube with DNA shield fluid) from the appendix of non-  
44  
45  
46 309 responders and patients with appendicitis recurrence is collected.

47  
48 310 **Additional serum samples** are collected from all the patients recruited in MAPPAC trial at  
49  
50 311 Turku University Hospital and for APPAC III trial at all five study hospitals for future  
51  
52  
53 312 immunological and inflammatory marker analysis and metabolomics approach. The serum  
54  
55 313 samples are divided into six aliquots prior freezing at -75 °C.

56  
57 314 **Questionnaire**

58  
59  
60

1  
2  
3 315 MAPPAC patients are asked to fill a primary questionnaire during the initial hospitalisation  
4  
5 316 covering topics possibly affecting their GM composition: chronic diseases, special diets,  
6  
7  
8 317 smoking and alcohol consumption, travel history, antibiotic intake, other medications (12  
9  
10 318 months prior the sampling), consumption of probiotics and other dietary supplements, recent  
11  
12 319 diarrhoea and/or vomiting, Bristol stool form scale estimate [44] measuring stool consistency  
13  
14  
15 320 (1 for very hard stool to 7 for diarrhoea) and the average number of defecations per day.  
16

### 17 321 **Follow-up during the hospitalisation**

18  
19 322 During the hospitalisation the following parameters will be recorded every 24 hours: pain  
20  
21  
22 323 assessed by Visual Analogue Scale (VAS), leukocyte count, CRP, temperature and clinical  
23  
24 324 findings at patient reassessment. If the patient is suspected of not responding to the  
25  
26  
27 325 randomized therapy based on clinical deterioration signs combined with laboratory findings  
28  
29 326 (signs of peritonitis, persisting fever, increasing pain, white blood cell count or CRP), the  
30  
31 327 patient will be operated based on the surgeon's decision and the reasons for proceeding to  
32  
33 328 appendectomy will be recorded. For appendectomy, laparoscopic approach is recommended.  
34  
35  
36 329 The operative findings and the histopathology of the appendix will be recorded. After the  
37  
38 330 initial hospitalisation, recurrent acute appendicitis will be diagnosed on a clinical basis and  
39  
40  
41 331 patients with a suspected recurrence of appendicitis will undergo a laparoscopic  
42  
43 332 appendectomy.  
44

### 45 333 **Follow-up**

46  
47  
48 334 The specific MAPPAC trial follow-up is conducted for patients also participating in the APPAC  
49  
50 335 II and III trials with collection of three faecal samples at home (at one week, six months and  
51  
52 336 one year). Follow-up samples at home are not collected in MAPPAC interventional groups  
53  
54  
55 337 undergoing appendectomy. The follow-up faecal sample is collected into 10 ml DNA/RNA  
56  
57 338 Shield Faecal Collection Tube (Zymo Research) enabling transportation and storage at room  
58  
59 339 temperature prior to DNA extraction. Patients also deliver a faecal sample into a gel tube for  
60



1  
2  
3 340 culture purposes. A follow-up questionnaire is collected at 6 and 12 months consisting of the  
4  
5 341 same questions as the preliminary questionnaire covering the time between hospital  
6  
7  
8 342 discharge and the follow-up time point. Other follow-up for patients in APPAC II trial will  
9  
10 343 include a phone interview at one week after discharge, APPAC III trial patients have their first  
11  
12 344 follow-up call 2-4 days after discharge from the hospital and then at 10 days, both trials at two  
13  
14  
15 345 months and at one, three, five and ten years. The follow-up for APPAC III patients will include  
16  
17 346 laboratory tests (leukocyte count, CRP, additional follow-up serum samples).

18  
19  
20 347

### 21 22 348 **Outcome parameters**

23  
24 349 Based on the MAPPAC trial design, no specific primary endpoint can be determined. The  
25  
26 350 following parameters will be recorded for all patients: age, gender, BMI, clinical findings on  
27  
28  
29 351 admission (tympanic temperature, nausea, pain or tenderness in the right lower abdominal  
30  
31 352 quadrant, pain migration, VAS pain scores, white blood cell count, CRP, findings on CT  
32  
33 353 imaging), and data on primary and follow-up questionnaires. Blood cultures will be obtained  
34  
35  
36 354 from patients with complicated acute appendicitis and for APPAC II and III trial patients at  
37  
38 355 Turku University Hospital.

39  
40  
41 356 The following outcome parameters will be assessed based on the sample types collected:

42  
43 357 *Parameters from the appendix i.e. patients undergoing appendectomy*

44  
45 358 Operative details and histopathology of the appendix, host transcriptomics, proteomics, and  
46  
47  
48 359 immunohistochemical analysis from appendiceal biopsy, possible appendicolith composition,  
49  
50 360 morphology, and classification.

51  
52 361 *Microbiological parameters from the rectal and appendiceal swabs, faecal and appendiceal*  
53  
54  
55 362 *samples*

56  
57 363 Microbial profile, metagenome and metatranscriptome, name of different identified bacterial  
58  
59 364 species, number of species identified both by NGS and culture methods, antimicrobial  
60

1  
2  
3 365 susceptibility test results, the presence of AMR related genes by molecular analysis methods,  
4  
5  
6 366 bacterial genome data of AMR or virulence genes, all microbial data combined with clinical and  
7  
8 367 additional data.

#### 10 368 *Serum samples*

11  
12  
13 369 In order to compare possible differences between patients with successful antibiotic therapy  
14  
15 370 to patients with either failed antibiotic therapy or complicated acute appendicitis, the serum  
16  
17 371 samples will be analysed to identify possible inflammatory or immunological markers.  
18  
19  
20 372 Biomarker analysis of numerous different cytokines, chemokines and growth factors as well  
21  
22 373 as serum metabolome will be analysed. Additional analysis include the level and activity of  
23  
24 374 CD73 and soluble vascular adhesion protein-1 (VAP-1).

25  
26  
27 375 Laboratory methods used in the trial to analyse the collected samples are described in detail  
28  
29 376 in the online supplementary material.

#### 31 377 **Statistical analysis**

32  
33  
34 378 Based on the explorative research nature of the MAPPAC study, there is not enough  
35  
36 379 information available about the study aims to enable sample size calculations. Categorical  
37  
38 380 variables of the study will be characterised using frequencies and percentages. For continuous  
39  
40  
41 381 variables means and standard deviations or medians with range and 25th and 75th  
42  
43 382 percentiles will be used. In case of categorical outcomes, groups will be compared using  
44  
45 383 Pearson's Chi-squared -test and if further analyses will be needed, logistic regression models  
46  
47  
48 384 will be used. Group differences in continuous variables will be evaluated using independent  
49  
50 385 samples t-test, analysis of variance (ANOVA) or non-parametric methods, if needed.  
51  
52 386 Associations between continuous variables will be evaluated using correlation coefficients  
53  
54  
55 387 and linear regression analysis and if adjustments are needed, linear models will be used.  
56  
57 388 Continuous outcomes measured in several time-points will be analysed using linear mixed  
58  
59 389 models. For categorical outcomes with repeated measurements generalised linear mixed  
60

1  
2  
3 390 models will be used. The assumptions of the methods will be checked for justification of the  
4  
5 391 analyses and transformations will be used for the variables, if needed. The study site  
6  
7  
8 392 differences will be evaluated in statistical models and if major differences are detected, more  
9  
10 393 complicated statistical models will be used in the analyses. Two-sided p-values will be used  
11  
12 394 and p-values less than 0.05 will be considered statistically significant. The measurements with  
13  
14  
15 395 missing data will automatically be excluded from the analyses of the variables in concern.  
16  
17 396 Statistical analyses will be performed using SAS System for Windows, Version 9.4 and JMP Pro  
18  
19 397 13 or later versions (SAS Institute, Cary, NC, USA).  
20  
21  
22 398

### 24 399 **Patients and public involvement**

26 400 The MAPPAC research questions and outcome measures were based on the results of original  
27  
28  
29 401 APPAC trial [10] and the study protocol was developed together with the study group  
30  
31 402 surgeons, clinical microbiologists and immunologists. Patients were not directly involved in  
32  
33  
34 403 the design of this study and the burden of study participation was not assessed by patients  
35  
36 404 themselves. Upon recruitment, patients are well informed of all aspects of the trial including  
37  
38 405 antibiotic or symptomatic therapy of CT-confirmed uncomplicated acute appendicitis,  
39  
40  
41 406 difference between complicated and uncomplicated acute appendicitis, treatment success,  
42  
43 407 possible late recurrence, and safety in order to help patients make an informed decision about  
44  
45 408 trial participation. Patients also receive additional instructions in a phone call made prior to  
46  
47  
48 409 follow-up sample collection at 6 and 12 months. After completion of data collection and  
49  
50 410 analysis, the patients will be informed of the study results and they will be provided with an  
51  
52 411 opportunity to ask further questions.  
53  
54  
55 412  
56  
57 413  
58  
59 414  
60

1  
2  
3  
4  
5  
6  
7  
8  
9  
10  
11  
12  
13  
14  
15  
16  
17  
18  
19  
20  
21  
22  
23  
24  
25  
26  
27  
28  
29  
30  
31  
32  
33  
34  
35  
36  
37  
38  
39  
40  
41  
42  
43  
44  
45  
46  
47  
48  
49  
50  
51  
52  
53  
54  
55  
56  
57  
58  
59  
60

## 415 **ETHICS AND DISSEMINATION**

### 416 **Ethics**

417 This protocol has been accepted by the Ethical Committee of the Hospital district of Southwest  
418 Finland (Turku University Hospital) and Finnish Medicines Agency (Fimea). The trial will be  
419 conducted in compliance with the Declaration of Helsinki.

### 420 **Data collection and confidentiality**

421 All data and samples are handled confidentially and the information in the datasets is non-  
422 identifiable. Data are gathered during the emergency room visit, hospitalisation for acute  
423 appendicitis, clinical observations, and follow-up phone calls. The main investigators will be  
424 in charge of the common database with full access to the data which is, otherwise strictly  
425 limited. As the MAPPAC and APPAC II and III trials are based on the same patient population,  
426 the interventions partly overlap and the enrolled patients are informed about this overlapping  
427 of the trials and the acquired data.

### 428 **Withdrawal**

429 Patients are informed of their right to withdraw from the study without explanation at any  
430 time. In case of patient withdrawal, they will be asked for permission to use their data.

### 431 **Dissemination plan**

432 Results from this trial and reported in articles which will be published in peer-reviewed  
433 journals. Results are also presented at national and international conferences to further  
434 distribute this research.

1  
2  
3 440 **DISCUSSION**

4  
5 441 As non-operative treatment for uncomplicated acute appendicitis has been shown to be  
6  
7  
8 442 efficient and safe also at long-term [10, 13-17] and cost-effective [18], understanding both the  
9  
10 443 etiology of the different appendicitis forms and potentially predicting the recurrences has  
11  
12 444 become of utmost clinical importance in order to thoroughly evaluate all the optimization of  
13  
14  
15 445 the different treatment options. The MAPPAC trial aims to assess this largely unknown  
16  
17 446 microbiological etiology of the different disease forms of acute appendicitis. In addition, the  
18  
19  
20 447 effects of antibiotic and placebo treatments on the GM composition and the effects of the  
21  
22 448 duration of the hospital stay on the AMR reservoir of the GM will be assessed. With the  
23  
24 449 longitudinal study design, both the immediate and long-term effects of the antibiotic treatment  
25  
26  
27 450 on GM can be analysed. As the hospital stay differs in APPAC II and APPAC III patients, the  
28  
29 451 effects of the duration of the hospital stay on the emergence of resistant bacteria and AMR  
30  
31 452 reservoir can be evaluated. Moreover, the comparison of the effects of antibiotic treatment on  
32  
33  
34 453 GM between two different administration routes (p.o. and i.v. + p.o.) is possible. This study  
35  
36 454 design carried out simultaneously with APPAC II and APPAC III clinical trials allows us to collect  
37  
38 455 a unique set of microbiological samples in a large prospective clinical setting, which may  
39  
40  
41 456 provide clinically relevant new knowledge of appendicitis microbiology and immunology  
42  
43 457 potentially having an impact on the treatment of acute appendicitis patients.

44  
45 458 In the 5-year follow up of the original APPAC trial, 39 % (n=100) of the antibiotic group patients  
46  
47  
48 459 underwent appendectomy for either during the primary hospitalization or for suspected late  
49  
50 460 appendicitis recurrence. Out of these hundred patients, 85 were operated on for suspected  
51  
52 461 recurrence and 78 patients had a histopathologically confirmed acute appendicitis [14].  
53  
54  
55 462 Understanding the pathophysiology and contributing factors in recurrent appendicitis are of  
56  
57 463 vital clinical importance in evaluating the optimal treatment paradigms for uncomplicated  
58  
59 464 acute appendicitis. Therefore, MAPPAC trial is assessing both initial non-responders to  
60

1  
2  
3  
4  
5  
6  
7  
8  
9  
10  
11  
12  
13  
14  
15  
16  
17  
18  
19  
20  
21  
22  
23  
24  
25  
26  
27  
28  
29  
30  
31  
32  
33  
34  
35  
36  
37  
38  
39  
40  
41  
42  
43  
44  
45  
46  
47  
48  
49  
50  
51  
52  
53  
54  
55  
56  
57  
58  
59  
60

antibiotic therapy and recurrent appendicitis after successful initial antibiotic treatment and these results may provide novel tools to predict the potential recurrence risk and thus help to assess the optimal treatment choice for patients with uncomplicated acute appendicitis.

### **Strengths and limitations**

MAPPAC has a strong synergy between APPAC II and III studies enabling the enrolment of both uncomplicated and complicated acute appendicitis patients in a large prospective series with associated clinical data to be assessed in conjunction with the microbiological and immunological findings. In order to thoroughly evaluate the microbiological etiology of appendicitis, MAPPAC has characteristics of an observational study. The determination of one primary outcome is insufficient for the study, as several factors are indispensable for the understanding of etiology and the effects of antibiotics on GM all provided with this unique set of microbiological samples. To our knowledge, only one previous study [27] has characterized the adult appendix microbiota during appendicitis in adult patients using NGS technique and to date no reports on the structure and physicochemical contents of appendicoliths exists. Using these assessments is a strength in our study. Further, to our knowledge this is the first trial aiming to prospectively assess the possible microbiological and/or immunological etiology of appendicitis recurrence after a successful initial conservative treatment with antibiotics or symptomatic therapy and primary non-responders to conservative treatment of uncomplicated acute appendicitis. The third strong element of the study is the accuracy of differential diagnosis between complicated and uncomplicated acute appendicitis as all patients included in the study are imaged with CT protocol. CT scan is the gold standard for acute appendicitis imaging and this near perfect accuracy of CT adds to the reliability of the clinical data and appendicitis severity also in the patients with uncomplicated acute appendicitis without a histopathological confirmation of the appendix.

1

2

3 489 The study limitations include the difficult challenge of conducting prospective clinical trials in  
4  
5 490 the emergency setting. It is expected that all eligible patients may not be evaluated for  
6  
7  
8 491 enrolment or some patients may not have all study samples available as the recruitment is  
9  
10 492 performed by a large number of surgeons on call. The lack of healthy control group is a  
11  
12 493 limitation in the study when determining the effects of antibiotics on GM, as the results cannot  
13  
14  
15 494 be fully distinguished from the effects of acute appendicitis.

16

17 495

18

19 496

20

21 497

22

23 498

24

25 499

26

27 500

28

29 501

30

31 502

32

33 503

34

35 504

36

37 505

38

39 506

40

41 507

42

43 508

44

45 509

46

47 510

48

49 511

50

51 512

52

53 513

54

55

56

For peer review only

### 514 **Authors' contributions**

515 All authors have contributed to the design of this trial protocol. PS is the chief investigator. PS,  
516 SV, AJH, EM, SJ, JG, and SS have initiated the project. The protocol was drafted by PS, which  
517 was refined by SV, AJH, EM, SS, SJ, JG, HM, EE, and SH. Statistical advice was provided by SH.  
518 SV was responsible for drafting the manuscript, which was refined by PS, AJH, and EM. All  
519 authors have read and approved the final manuscript.

520 In addition, The APPAC collaborative study group lead by primary investigator Paulina  
521 Salminen includes the following contributors: Sallinen V., Leppäniemi A., Rautio T., Meriläinen  
522 S., Nordström P., Laukkarinen J., Rantala T., Savolainen H., Aarnio M., Mattila A., Haijanen J.,  
523 Sävelä E-L., Imre I., Paajanen H., Rintala J., Pinta T., Sippola T., and Böckerman P. All  
524 contributors are local investigators who are responsible for execution of the APPAC II and/or  
525 APPAC III trials in addition to execution of the applicable parts of the MAPPAC trial and valid  
526 data gathering. They have all read and approved the final manuscript and they will be included  
527 in the future MAPPAC trial reports, when applicable. The surgical departments of the  
528 following Finnish Hospitals contribute to the execution of this trial: University hospitals of  
529 Turku, Helsinki, Oulu, Tampere, and Kuopio, central hospitals of Jyväskylä, Pori, Mikkeli,  
530 Seinäjoki, and Rovaniemi.

### 531 **Funding**

532 This work was supported by clinical research grants from Sigrid Juselius foundation, the  
533 Academy of Finland, Mary and Georg C. Ehrnrooth foundation, The Maud Kuistila Memorial  
534 Foundation, Doctoral Programme of Clinical Investigation of University of Turku, Tyks-Sapa  
535 Research Funds, Finland, Turku University and Turku University foundation. This is a  
536 researcher oriented trial.

### 537 **Competing interests**

538 Authors declare they have no competing interests.



1  
2  
3 539 **Acknowledgements**

4  
5 540 Due to the multicentre nature of the trial, not all supporting researchers are mentioned by  
6  
7  
8 541 name in the protocol article. In addition, we acknowledge all supporting surgeons,  
9  
10 542 radiologists, emergency medicine physicians, nurses and technical staff in the laboratory.

11  
12 543  
13  
14  
15 544 **REFERENCES**

- 16  
17  
18 545 1 Addiss DG, Shaffer N, Fowler BS, et al. The epidemiology of appendicitis and appendectomy  
19 546 in the United States, *Am J Epidemiol* 1990;132:910-25.
- 20  
21  
22 547 2 Ferris M, Quan S, Kaplan B, et al. The Global Incidence of Appendicitis: A Systematic Review  
23 548 of Population-based Studies, *Annals of Surgery* 2017;266:237-41  
24 549 doi:10.1097/SLA.0000000000002188.
- 25  
26  
27 550 3 Livingston EH, Fomby TB, Woodward WA, et al. Epidemiological Similarities Between  
28 551 Appendicitis and Diverticulitis Suggesting a Common Underlying Pathogenesis, *Archives of*  
29 552 *Surgery* 2011;146:308-14 doi:10.1001/archsurg.2011.2.
- 30  
31 553 4 Dai L, Shuai J. Laparoscopic versus open appendectomy in adults and children: A meta-  
32 554 analysis of randomized controlled trials, *United European Gastroenterol J* 2017;5:542-53  
33 555 doi:10.1177/2050640616661931.
- 34  
35  
36 556 5 Leung TTW, Dixon E, Gill M, et al. Bowel obstruction following appendectomy: what is the  
37 557 true incidence? *Ann Surg* 2009;250:51-3 doi:10.1097/SLA.0b013e3181ad64a7.
- 38  
39  
40 558 6 Margenthaler JA, Longo WE, Virgo KS, et al. Risk factors for adverse outcomes after the  
41 559 surgical treatment of appendicitis in adults, *Ann Surg* 2003;238:59-66  
42 560 doi:10.1097/01.SLA.0000074961.50020.f8.
- 43  
44 561 7 Hansson J, Körner U, Ludwigs K, et al. Antibiotics as first-line therapy for acute appendicitis:  
45 562 evidence for a change in clinical practice, *World J Surg* 2012;36:2028-36 doi:10.1007/s00268-  
46 563 012-1641-x.
- 47  
48  
49 564 8 Harnoss JC, Probst P, Büchler MW, et al. Antibiotics Versus Appendicectomy for the  
50 565 Treatment of Uncomplicated Acute Appendicitis: An Updated Meta-Analysis of Randomised  
51 566 Controlled Trials by Rollins et al, *World J Surg* 2017;41:2411 doi:10.1007/s00268-016-3864-  
52 567 8.
- 53  
54  
55 568 9 Sallinen V, Tikkinen KAO. Antibiotics or Appendectomy for Acute Non-Perforated  
56 569 Appendicitis--How to Interpret the Evidence? *Scand J Surg* 2016;105:3-4  
57 570 doi:10.1177/1457496916632188.
- 58  
59  
60

- 1  
2  
3 571 10 Salminen P, Paajanen H, Rautio T, et al. Antibiotic Therapy vs Appendectomy for Treatment  
4 572 of Uncomplicated Acute Appendicitis: The APPAC Randomized Clinical Trial, *JAMA*  
5 573 2015;313:2340-8.  
6  
7  
8 574 11 Styruud J, Eriksson S, Nilsson I, et al. Appendectomy versus Antibiotic Treatment in Acute  
9 575 Appendicitis. A Prospective Multicenter Randomized Controlled Trial, *World J Surg*  
10 576 2006;30:1033 doi:10.1007/s00268-005-0304-6.  
11  
12  
13 577 12 Varadhan KK, Humes DJ, Neal KR, et al. Antibiotic therapy versus appendectomy for acute  
14 578 appendicitis: a meta-analysis, *World J Surg* 2010;34:199-209 doi:10.1007/s00268-009-0343-  
15 579 5.  
16  
17 580 13 Vons C, Barry C, Maitre S, et al. Amoxicillin plus clavulanic acid versus appendicectomy for  
18 581 treatment of acute uncomplicated appendicitis: an open-label, non-inferiority, randomised  
19 582 controlled trial, *Lancet* 2011;377:1573-9 doi:10.1016/S0140-6736(11)60410-8.  
20  
21  
22 583 14 Salminen P, Tuominen R, Paajanen H, et al. Five-Year Follow-up of Antibiotic Therapy for  
23 584 Uncomplicated Acute Appendicitis in the APPAC Randomized Clinical Trial, *JAMA*  
24 585 2018;320:1259-65 doi:10.1001/jama.2018.13201 [doi].  
25  
26  
27 586 15 Rollins KE, Varadhan KK, Neal KR, et al. Antibiotics Versus Appendicectomy for the  
28 587 Treatment of Uncomplicated Acute Appendicitis: An Updated Meta-Analysis of Randomised  
29 588 Controlled Trials, *World J Surg* 2016;40:2305-18 doi:10.1007/s00268-016-3561-7 [doi].  
30  
31  
32 589 16 Sallinen V, Akl EA, You JJ, et al. Meta-analysis of antibiotics versus appendicectomy for non-  
33 590 perforated acute appendicitis, *Br J Surg* 2016;103:656-67 doi:10.1002/bjs.10147 [doi].  
34  
35 591 17 Sakran JV, Mylonas KS, Gryparis A, et al. Operation versus antibiotics--The "appendicitis  
36 592 conundrum" continues: A meta-analysis, *J Trauma Acute Care Surg* 2017;82:1129-37  
37 593 doi:10.1097/TA.0000000000001450 [doi].  
38  
39  
40 594 18 Sippola S, Grönroos J, Tuominen R, et al. Economic evaluation of antibiotic therapy versus  
41 595 appendicectomy for the treatment of uncomplicated acute appendicitis from the APPAC  
42 596 randomized clinical trial, *British Journal of Surgery* 2017;104:1355-61 doi:10.1002/bjs.10575.  
43  
44 597 19 Forbes GB, Lloyd-Davies RW. Calculous disease of the vermiform appendix, *Gut*  
45 598 1966;7:583-92 doi:10.1136/gut.7.6.583.  
46  
47  
48 599 20 Lamps LW. Infectious Causes of Appendicitis, *Infectious Disease Clinics of North America*  
49 600 2010;24:995-1018 doi:10.1016/j.idc.2010.07.012.  
50  
51 601 21 Swidsinski A, Doerffel Y, Loening-Baucke V, et al. Acute appendicitis is characterised by  
52 602 local invasion with *Fusobacterium nucleatum/necrophorum*, *Gut* 2011;60:34-40  
53 603 doi:10.1136/gut.2009.191320.  
54  
55  
56 604 22 Zhong D, Brower-Sinning R, Firek B, et al. Acute appendicitis in children is associated with  
57 605 an abundance of bacteria from the phylum *Fusobacteria*, *J Pediatr Surg* 2014;49:441-6  
58 606 doi:10.1016/j.jpedsurg.2013.06.026 [doi].  
59  
60

- 1  
2  
3 607 23 Jindal N, Kaur GD, Arora S, et al. Bacteriology of acute appendicitis with special reference to  
4 608 anaerobes, *Indian J Pathol Microbiol* 1994;37:299-305.  
5  
6  
7 609 24 Martirosian G, Bulanda M, Wojcik-Stojek B, et al. Acute appendicitis: the role of  
8 610 enterotoxigenic strains of *Bacteroides fragilis* and *Clostridium difficile*, *Med Sci Monit*  
9 611 2001;7:382-6.  
10  
11 612 25 Chen CY, Chen YC, Pu HN, et al. Bacteriology of acute appendicitis and its implication for  
12 613 the use of prophylactic antibiotics, *Surg Infect (Larchmt)* 2012;13:383-90  
14 614 doi:10.1089/sur.2011.135 [doi].  
15  
16 615 26 Reinisch A, Malkomes P, Habbe N, et al. Bad bacteria in acute appendicitis: rare but  
17 616 relevant, *Int J Colorectal Dis* 2017;32:1303-11 doi:10.1007/s00384-017-2862-0 [doi].  
18  
19  
20 617 27 Guinane CM, Tadrous A, Fouhy F, et al. Microbial composition of human appendices from  
21 618 patients following appendectomy, *MBio* 2013;4:12.  
22  
23 619 28 Dethlefsen L, Relman DA. Incomplete recovery and individualized responses of the human  
24 620 distal gut microbiota to repeated antibiotic perturbation, *Proc Natl Acad Sci U S A* 2011;108  
25 621 Suppl 1:4554-61 doi:10.1073/pnas.1000087107 [doi].  
26  
27  
28 622 29 Jernberg C, Lofmark S, Edlund C, et al. Long-term ecological impacts of antibiotic  
29 623 administration on the human intestinal microbiota, *ISME J* 2007;1:56-66 doi:ismej20073 [pii].  
30  
31 624 30 Manichanh C, Rigottier-Gois L, Bonnaud E, et al. Reduced diversity of faecal microbiota in  
32 625 Crohn's disease revealed by a metagenomic approach, *Gut* 2006;55:205-11  
33 626 doi:gut.2005.073817 [pii].  
34  
35  
36 627 31 Qin J, Li Y, Cai Z, et al. A metagenome-wide association study of gut microbiota in type 2  
37 628 diabetes, *Nature* 2012;490:55-60 doi:10.1038/nature11450 [doi].  
38  
39  
40 629 32 Lindgren M, Lofmark S, Edlund C, et al. Prolonged impact of a one-week course of  
41 630 clindamycin on *Enterococcus* spp. in human normal microbiota, *Scand J Infect Dis*  
42 631 2009;41:215-9 doi:10.1080/00365540802651897 [doi].  
43  
44 632 33 Raymond F, Ouameur AA, Deraspe M, et al. The initial state of the human gut microbiome  
45 633 determines its reshaping by antibiotics, *ISME J* 2016;10:707-20 doi:10.1038/ismej.2015.148  
46 634 [doi].  
47  
48  
49 635 34 Jakobsson HE, Jernberg C, Andersson AF, et al. Short-term antibiotic treatment has  
50 636 differing long-term impacts on the human throat and gut microbiome, *PLoS One* 2010;5:e9836  
51 637 doi:10.1371/journal.pone.0009836 [doi].  
52  
53  
54 638 35 Buelow E, Bello Gonzalez, T D J, Fuentes S, et al. Comparative gut microbiota and resistome  
55 639 profiling of intensive care patients receiving selective digestive tract decontamination and  
56 640 healthy subjects, *Microbiome* 2017;5:z doi:10.1186/s40168-017-0309-z [doi].  
57  
58 641 36 Card RM, Mafura M, Hunt T, et al. Impact of Ciprofloxacin and Clindamycin Administration  
59 642 on Gram-Negative Bacteria Isolated from Healthy Volunteers and Characterization of the  
60

1

2

3 643 Resistance Genes They Harbor, *Antimicrob Agents Chemother* 2015;59:4410-6  
4 644 doi:10.1128/AAC.00068-15 [doi].

5

6

7 645 37 Chan A, Tetzlaff JM, Altman DG, et al. SPIRIT 2013 statement: defining standard protocol  
8 646 items for clinical trials, *Ann Intern Med* 2013;158:200-7 doi:10.7326/0003-4819-158-3-  
9 647 201302050-00583.

10

11

12 648 38 Haijanen J, Sippola S, Gronroos J, et al. Optimising the antibiotic treatment of  
13 649 uncomplicated acute appendicitis: a protocol for a multicentre randomised clinical trial  
14 650 (APPAC II trial), *BMC Surg* 2018;18:y doi:10.1186/s12893-018-0451-y [doi].

15

16

17 651 39 Sippola S, Gronroos J, Sallinen V, et al. A randomised placebo-controlled double-blind  
18 652 multicentre trial comparing antibiotic therapy with placebo in the treatment of  
19 653 uncomplicated acute appendicitis: APPAC III trial study protocol, *BMJ Open* 2018;8:023623  
20 654 doi:10.1136/bmjopen-2018-023623 [doi].

21

22

23 655 40 Niiniviita H, Salminen P, Grönroos JM, et al. LOW-DOSE CT PROTOCOL OPTIMIZATION FOR  
24 656 THE ASSESSMENT OF ACUTE APPENDICITIS: THE OPTICAP PHANTOM STUDY, *Radiat Prot*  
25 657 *Dosimetry* 2017:1-9 doi:10.1093/rpd/ncx070.

26

27

28 658 41 Lewis SJ, Heaton KW. Stool form scale as a useful guide to intestinal transit time, *Scand J*  
29 659 *Gastroenterol* 1997;32:920-4 doi:10.3109/00365529709011203 [doi].

30

31

32

33

34

35

36

37

38

39

40

41

42

43

44

45

46

47

48

49

50

51

52

53

54

55

56

57

58

59

60

61

62

63

64

65

66

67

68

## 663 Abbreviations

664 **AMR:** Antimicrobial resistance

665 **BMI:** Body mass index

666 **CRP:** C-reactive protein

667 **CT:** Computed tomography

668 **GM:** Gut microbiota

669 **i.v.:** Intravenous

670 **MALDI-TOF:** Matrix Assisted Laser Desorption/Ionisation time-of-flight mass spectrometry

671 **MS:** Mass spectrometry

672 **NGS:** Next generation sequencing

673 **p.o.:** Per os

1  
2  
3  
4  
5  
6  
7  
8  
9  
10  
11  
12  
13  
14  
15  
16  
17  
18  
19  
20  
21  
22  
23  
24  
25  
26  
27  
28  
29  
30  
31  
32  
33  
34  
35  
36  
37  
38  
39  
40  
41  
42  
43  
44  
45  
46  
47  
48  
49  
50  
51  
52  
53  
54  
55  
56  
57  
58  
59  
60

674 **SPIRIT:** Standard Protocol Items: recommendations for Interventional Trials

675 **VAP-1:** Vascular adhesion protein-1

676 **VAS:** Visual analogue scale

677

678

679

**FIGURE TITLES**

681

682 Figure 1. The synergy between MAPPAC, APPAC II and APPAC III studies.

683

684 Figure 2. Flow chart of the study protocol

684

685

For peer review only

1  
2  
3  
4  
5  
6  
7  
8  
9  
10  
11  
12  
13  
14  
15  
16  
17  
18  
19  
20  
21  
22  
23  
24  
25  
26  
27  
28  
29  
30  
31  
32  
33  
34  
35  
36  
37  
38  
39

Patients with a clinical suspicion of acute appendicitis

Optimized low dose CT imaging (OPTICAP trial)

Uncomplicated acute appendicitis

Complicated acute appendicitis

refusing to participate in the APPAC II or III trials

MAPPAC enrolment at Turku University Hospital 24/7

APPAC II patient enrolment 24/7

MAPPAC at Turku University Hospital

Randomisation

- i.v. + p.o.
- p.o.

APPAC III patient enrolment on week days from 8 am to 2 pm

MAPPAC at all APPACIII study hospitals

Randomisation

- antibiotics
- placebo

Laparoscopic appendectomy

- complicated appendicitis
- uncomplicated appendicitis
- recurrent appendicitis

treatment failure or recurrent appendicitis

Microbiological and immunological samples and questionnaire

1  
2  
3  
4  
5  
6  
7  
8  
9  
10  
11  
12  
13  
14  
15  
16  
17  
18  
19  
20  
21  
22  
23  
24  
25  
26  
27  
28  
29  
30  
31  
32  
33  
34  
35  
36  
37  
38  
39  
40  
41  
42  
43  
44  
45  
46  
47  
48  
49  
50  
51  
52  
53  
54  
55  
56  
57  
58  
59

Clinical suspicion of acute appendicitis

BMI < 30 -> low-dose CT scan  
BMI > 30 -> standard dose CT scan

Exclusion:  
• inclusion criteria not met  
• declined to participate

Uncomplicated acute appendicitis

Complicated acute appendicitis

Declined to participate in APPAC II and III

Consent for MAPPAC

Consent for APPAC II and MAPPAC

Consent for APPAC III and MAPPAC

Rectal swab and pre-questionnaire at timepoint 0

Randomisation

Randomisation

i.v. + p.o. group  
i.v. ertapenem 1 g/day for two days continued by p.o. levofloxacin 500 mg/day + metronidazole 1.5 g/day for five days

p.o. group  
p.o. moxifloxacin 400 mg per day for seven day

Antibiotic group  
i.v. ertapenem 1 g/day for three days continued by p.o. levofloxacin 500 mg/day + metronidazole 1.5 g/day for four days

Placebo group  
i.v. placebo for three days continued by p.o. placebo for four days

Rectal swab at timepoint 1 (1 day)

Clinical status, temperature, VAS daily

Deteriorating in clinical status

Appendectomy

Rectal swab at timepoint 2 (2-3 days) only from APPAC III patients

Discharge from the hospital

Recurrence of appendicitis

Microbiological samples from appendix PAD, blood culture

Discharge from the hospital

Follow up:  
• Phone (2-4 days, 2 weeks, 2 months and 1,3,5 and 10 years)  
• Laboratory tests  
Fecal sample and questionnaire at timepoints 7 days, 6 and 12 months

## SUPPLEMENTARY FILE

### Laboratory methods

#### DNA extraction and analysis

##### Stool samples and rectal and appendiceal swabs

Bacterial DNA from rectal and appendiceal swabs and faecal samples are extracted with semiautomated DNA extraction kit together with NorDiag Arrow extraction instrument (Diasorin). The following sample preparation is undertaken before the extraction: 500 µl of the sample is added to 700 µl of stool stabilizer in a 1.4 mm Ceramic Powerbead Tube (Qiagen, Hilden, Germany) and homogenized with MO BIO PowerLyzer 24 Bench Top Bead-Based Homogenizer (MO BIO Laboratories, Inc., USA) at 1000 rpm for 3 minutes followed by centrifugation at 5000 x g for 5 minutes and 600 µl of the supernatant is transferred into a new tube, the centrifugation is repeated and 500 µl of the supernatant is transferred into a new tube. This pretreatment is followed by the DNA extraction, which is performed according to the manufacturer's instructions.

**Appendiceal biopsy:** Microbiological DNA is extracted from appendix biopsy stored in RNAlater with semiautomated DNA extraction kit using NorDiag Arrow extraction instrument. At first RNA later is removed by centrifugation and the pellet is resuspended into ultrapure water. Subsequently, the resuspension containing also the biopsy is treated with proteinase K in thermomixer. From the resulting solution DNA extraction is carried out according to manufacturer's instructions.

The concentration of eluted DNA from all sample types is measured with Qubit dsDNA HS or BR assay kit (Thermo Fisher Scientific) using Qubit fluorometer (Life Technologies, Carlsbad,



1  
2  
3 California, USA). DNA is divided into two aliquots and stored at -75°C for later analysis. Microbial  
4  
5 profile of samples will be analysed with appropriate methods including NGS approach.  
6  
7  
8  
9

### 10 **Analyses of transcriptome and proteome from appendiceal biopsy**

11  
12 Total RNA and proteins from the appendiceal biopsy are extracted with appropriate methods.  
13  
14 Transcriptome is analysed with RNA sequencing using Illumina Hiseq system. In addition, the  
15  
16 expression of specific genes is quantified with quantitative real-time PCR. Proteome is  
17  
18 characterized using mass spectrometry-based methods with qualitative and quantitative  
19  
20 approach.  
21  
22  
23  
24  
25  
26

### 27 **Culture methods**

28  
29 Appendiceal swabs are cultured with both aerobic and anaerobic culture methods. For aerobic  
30  
31 culture the following growth media are used: CHROMagar Orientation (Becton Dickinson,  
32  
33 Franklin Lakes, New Jersey, USA), Trypticase soy agar with 5% sheep blood (Becton Dickinson),  
34  
35 Yersinia selective agar and Streptococcus selective agar (in house production). If the  
36  
37 appendectomy is performed during the office hours, an additional anaerobic culture is made in  
38  
39 connection with the sample collection. Samples for anaerobic culturing are collected with a sterile  
40  
41 cotton swab from the appendix and cultured for fastidious anaerobe agar with blood (FAA) and  
42  
43 kanamycin-vancomycin laked blood agar (KVLB) (both in house production), which are  
44  
45 immediately transferred into anaerobic jar with anaerobic gas generating sachet (Anaerogen 3,5  
46  
47 l, Thermo Fisher Scientific).  
48  
49  
50  
51  
52  
53  
54  
55  
56  
57  
58  
59  
60

1  
2  
3 Cultures are incubated at +35 °C for 18-24 hours. Morphologically distinct colonies are  
4  
5 subcultured until a pure culture is obtained. Isolated species are frozen in a mixture of skim milk  
6  
7 and glycerol at -75 °C.  
8  
9

### 10 11 12 **MALDI-TOF mass spectrometry**

13  
14 The identification of isolated bacteria is done with Bruker matrix-assisted laser  
15  
16 desorption/ionisation time-of-flight mass spectrometry (MALDI-TOF MS). Isolates are inoculated  
17  
18 and cultured for 18-48 hours at +35 °C before the analysis. For the analysis, colony is applied  
19  
20 either directly or through ethanol/formic acid extraction on a steel plate and HCCA matrix ( $\alpha$ -  
21  
22 cyano-4-hydroxycinnamic acid in 50% acetonitrile-2.5% trifluoroacetic acid (Bruker Daltonics,  
23  
24 Bremen, Germany)) is added according to the manufacturer's instructions. The identification is  
25  
26 done using Microflex LT instrument and MALDI Biotyper software (Bruker Daltonics). If isolates  
27  
28 cannot be identified due to the absence of reference peaks in the database, the isolate is identified  
29  
30 with sequencing the 16S rRNA gene.  
31  
32  
33  
34  
35  
36  
37

### 38 **Antimicrobial susceptibility testing**

39  
40 Phenotypic antimicrobial susceptibility testing for the isolated aerobic and anaerobic bacteria is  
41  
42 performed by disk diffusion and MIC methods, according to the European Committee on  
43  
44 Antimicrobial Susceptibility Testing (EUCAST) guidelines. For certain bacteria, the Clinical and  
45  
46 Laboratory Standards Institute (CLSI) guidelines can be used.  
47  
48

49  
50 Further molecular analysis for antimicrobial resistance or virulence genes using e.g., PCR, Sanger  
51  
52 sequencing and whole genome sequencing (WGS) are also performed for selected isolates.  
53  
54

### 55 **Appendicolith analysis**

1  
2  
3 Appendicoliths are assessed both on the surface and cross-sectional morphology. Based on the  
4 morphological characteristics and a degree of hardness, all appendicoliths will be classified. The  
5 morphological characteristics and a degree of hardness, all appendicoliths will be classified. The  
6 composition of selected appendicoliths are analysed with physical and chemical methods.  
7  
8  
9

### 10 11 12 **Immunological analysis** 13

14  
15 The appendiceal biopsies are analysed immunohistochemically by determining the presence of  
16 different cell types and blood vessel surface markers. Neutrophils, leukocytes and monocytes will  
17 be analysed by cell type in larger groups and special interest will be focused on lymphocyte  
18 subtypes (i.e., CD4/CD8 and more detailed subgroup analyses such as regulatory T cells) and  
19 monocyte markers (i.e., macrophage M1/M2 / receptor MHCII). Moreover, certain inflammation  
20 induced markers on endothelium such as VAP-1, E-selectin and P-selectin will be evaluated. In order  
21 to compare possible differences between patients with successful antibiotic therapy to patients with  
22 failed antibiotic therapy or complicated acute appendicitis the serum samples will be screened to  
23 identify possible inflammatory or immunological markers for identifying the different forms of the  
24 disease. For example, cytokines, chemokines and growth factors will be analysed using BioRad Pro  
25 multiplex assay system. Moreover, we will use in house analyses to measure soluble VAP-1  
26 (inflammatory) and CD73 (anti-inflammatory). The results obtained from immunological analyses  
27 will be correlated to the clinical parameters and to the microbiological findings.  
28  
29  
30  
31  
32  
33  
34  
35  
36  
37  
38  
39  
40  
41  
42  
43  
44  
45  
46  
47  
48  
49  
50  
51  
52  
53  
54  
55  
56  
57  
58  
59  
60

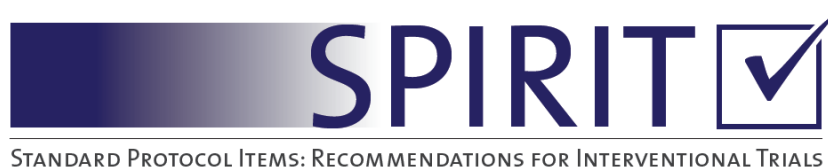

STANDARD PROTOCOL ITEMS: RECOMMENDATIONS FOR INTERVENTIONAL TRIALS

SPIRIT 2013 Checklist: Recommended items to address in a clinical trial protocol and related documents\*

| Section/item                      | Item No | Description                                                                                                                                                                                                                                                                              | Page Number on which item is reported |
|-----------------------------------|---------|------------------------------------------------------------------------------------------------------------------------------------------------------------------------------------------------------------------------------------------------------------------------------------------|---------------------------------------|
| <b>Administrative information</b> |         |                                                                                                                                                                                                                                                                                          |                                       |
| Title                             | 1       | Descriptive title identifying the study design, population, interventions, and, if applicable, trial acronym                                                                                                                                                                             | 1                                     |
| Trial registration                | 2a      | Trial identifier and registry name. If not yet registered, name of intended registry                                                                                                                                                                                                     | 3                                     |
|                                   | 2b      | All items from the World Health Organization Trial Registration Data Set                                                                                                                                                                                                                 | n/a                                   |
| Protocol version                  | 3       | Date and version identifier                                                                                                                                                                                                                                                              | n/a                                   |
| Funding                           | 4       | Sources and types of financial, material, and other support                                                                                                                                                                                                                              | 22                                    |
| Roles and responsibilities        | 5a      | Names, affiliations, and roles of protocol contributors                                                                                                                                                                                                                                  | 1,22                                  |
|                                   | 5b      | Name and contact information for the trial sponsor                                                                                                                                                                                                                                       | 1                                     |
|                                   | 5c      | Role of study sponsor and funders, if any, in study design; collection, management, analysis, and interpretation of data; writing of the report; and the decision to submit the report for publication, including whether they will have ultimate authority over any of these activities | 22                                    |
|                                   | 5d      | Composition, roles, and responsibilities of the coordinating centre, steering committee, endpoint adjudication committee, data management team, and other individuals or groups overseeing the trial, if applicable (see Item 21a for data monitoring committee)                         | 7-8                                   |
| <b>Introduction</b>               |         |                                                                                                                                                                                                                                                                                          |                                       |

|                                                           |     |                                                                                                                                                                                                                                                                                                                                                                                |           |
|-----------------------------------------------------------|-----|--------------------------------------------------------------------------------------------------------------------------------------------------------------------------------------------------------------------------------------------------------------------------------------------------------------------------------------------------------------------------------|-----------|
| Background and rationale                                  | 6a  | Description of research question and justification for undertaking the trial, including summary of relevant studies (published and unpublished) examining benefits and harms for each intervention                                                                                                                                                                             | 5-7       |
|                                                           | 6b  | Explanation for choice of comparators                                                                                                                                                                                                                                                                                                                                          | 6-7       |
| Objectives                                                | 7   | Specific objectives or hypotheses                                                                                                                                                                                                                                                                                                                                              | 7         |
| Trial design                                              | 8   | Description of trial design including type of trial (eg, parallel group, crossover, factorial, single group), allocation ratio, and framework (eg, superiority, equivalence, noninferiority, exploratory)                                                                                                                                                                      | 7         |
| <b>Methods: Participants, interventions, and outcomes</b> |     |                                                                                                                                                                                                                                                                                                                                                                                |           |
| Study setting                                             | 9   | Description of study settings (eg, community clinic, academic hospital) and list of countries where data will be collected. Reference to where list of study sites can be obtained                                                                                                                                                                                             | 8         |
| Eligibility criteria                                      | 10  | Inclusion and exclusion criteria for participants. If applicable, eligibility criteria for study centres and individuals who will perform the interventions (eg, surgeons, psychotherapists)                                                                                                                                                                                   | 9-11      |
| Interventions                                             | 11a | Interventions for each group with sufficient detail to allow replication, including how and when they will be administered                                                                                                                                                                                                                                                     | 11-12     |
|                                                           | 11b | Criteria for discontinuing or modifying allocated interventions for a given trial participant (eg, drug dose change in response to harms, participant request, or improving/worsening disease)                                                                                                                                                                                 | 14        |
|                                                           | 11c | Strategies to improve adherence to intervention protocols, and any procedures for monitoring adherence (eg, drug tablet return, laboratory tests)                                                                                                                                                                                                                              | 14-15, 17 |
|                                                           | 11d | Relevant concomitant care and interventions that are permitted or prohibited during the trial                                                                                                                                                                                                                                                                                  | n/a       |
| Outcomes                                                  | 12  | Primary, secondary, and other outcomes, including the specific measurement variable (eg, systolic blood pressure), analysis metric (eg, change from baseline, final value, time to event), method of aggregation (eg, median, proportion), and time point for each outcome. Explanation of the clinical relevance of chosen efficacy and harm outcomes is strongly recommended | 15-16     |

|                                                                     |     |                                                                                                                                                                                                                                                                                                                                                          |                 |
|---------------------------------------------------------------------|-----|----------------------------------------------------------------------------------------------------------------------------------------------------------------------------------------------------------------------------------------------------------------------------------------------------------------------------------------------------------|-----------------|
| Participant timeline                                                | 13  | Time schedule of enrolment, interventions (including any run-ins and washouts), assessments, and visits for participants. A schematic diagram is highly recommended (see Figure)                                                                                                                                                                         | 12-15, figure 2 |
| Sample size                                                         | 14  | Estimated number of participants needed to achieve study objectives and how it was determined, including clinical and statistical assumptions supporting any sample size calculations                                                                                                                                                                    | 16, n/a         |
| Recruitment                                                         | 15  | Strategies for achieving adequate participant enrolment to reach target sample size                                                                                                                                                                                                                                                                      | 11, 17          |
| <b>Methods: Assignment of interventions (for controlled trials)</b> |     |                                                                                                                                                                                                                                                                                                                                                          |                 |
| Allocation:                                                         |     |                                                                                                                                                                                                                                                                                                                                                          | n/a             |
| Sequence generation                                                 | 16a | Method of generating the allocation sequence (eg, computer-generated random numbers), and list of any factors for stratification. To reduce predictability of a random sequence, details of any planned restriction (eg, blocking) should be provided in a separate document that is unavailable to those who enrol participants or assign interventions | n/a             |
| Allocation concealment mechanism                                    | 16b | Mechanism of implementing the allocation sequence (eg, central telephone; sequentially numbered, opaque, sealed envelopes), describing any steps to conceal the sequence until interventions are assigned                                                                                                                                                | n/a             |
| Implementation                                                      | 16c | Who will generate the allocation sequence, who will enrol participants, and who will assign participants to interventions                                                                                                                                                                                                                                | n/a             |
| Blinding (masking)                                                  | 17a | Who will be blinded after assignment to interventions (eg, trial participants, care providers, outcome assessors, data analysts), and how                                                                                                                                                                                                                | n/a             |
|                                                                     | 17b | If blinded, circumstances under which unblinding is permissible, and procedure for revealing a participant's allocated intervention during the trial                                                                                                                                                                                                     | n/a             |
| <b>Methods: Data collection, management, and analysis</b>           |     |                                                                                                                                                                                                                                                                                                                                                          |                 |

|                                                          |                            |     |                                                                                                                                                                                                                                                                                                                                                                                                              |                               |
|----------------------------------------------------------|----------------------------|-----|--------------------------------------------------------------------------------------------------------------------------------------------------------------------------------------------------------------------------------------------------------------------------------------------------------------------------------------------------------------------------------------------------------------|-------------------------------|
| 1<br>2<br>3<br>4<br>5<br>6<br>7<br>8<br>9<br>10<br>11    | Data collection methods    | 18a | Plans for assessment and collection of outcome, baseline, and other trial data, including any related processes to promote data quality (eg, duplicate measurements, training of assessors) and a description of study instruments (eg, questionnaires, laboratory tests) along with their reliability and validity, if known. Reference to where data collection forms can be found, if not in the protocol | 12-17, supplementary material |
| 12<br>13<br>14<br>15<br>16<br>17                         |                            | 18b | Plans to promote participant retention and complete follow-up, including list of any outcome data to be collected for participants who discontinue or deviate from intervention protocols                                                                                                                                                                                                                    | 17                            |
| 18<br>19<br>20<br>21<br>22<br>23<br>24<br>25             | Data management            | 19  | Plans for data entry, coding, security, and storage, including any related processes to promote data quality (eg, double data entry; range checks for data values). Reference to where details of data management procedures can be found, if not in the protocol                                                                                                                                            | 18                            |
| 26<br>27<br>28<br>29<br>30<br>31                         | Statistical methods        | 20a | Statistical methods for analysing primary and secondary outcomes. Reference to where other details of the statistical analysis plan can be found, if not in the protocol                                                                                                                                                                                                                                     | 16                            |
| 32<br>33<br>34                                           |                            | 20b | Methods for any additional analyses (eg, subgroup and adjusted analyses)                                                                                                                                                                                                                                                                                                                                     | 17                            |
| 35<br>36<br>37<br>38<br>39<br>40                         |                            | 20c | Definition of analysis population relating to protocol non-adherence (eg, as randomised analysis), and any statistical methods to handle missing data (eg, multiple imputation)                                                                                                                                                                                                                              | n/a                           |
| 41<br>42                                                 | <b>Methods: Monitoring</b> |     |                                                                                                                                                                                                                                                                                                                                                                                                              |                               |
| 43<br>44<br>45<br>46<br>47<br>48<br>49<br>50<br>51<br>52 | Data monitoring            | 21a | Composition of data monitoring committee (DMC); summary of its role and reporting structure; statement of whether it is independent from the sponsor and competing interests; and reference to where further details about its charter can be found, if not in the protocol. Alternatively, an explanation of why a DMC is not needed                                                                        | 22                            |
| 53<br>54<br>55<br>56<br>57<br>58<br>59<br>60             |                            | 21b | Description of any interim analyses and stopping guidelines, including who will have access to these interim results and make the final decision to terminate the trial                                                                                                                                                                                                                                      | n/a                           |

|                                 |     |                                                                                                                                                                                                                                                                                     |        |
|---------------------------------|-----|-------------------------------------------------------------------------------------------------------------------------------------------------------------------------------------------------------------------------------------------------------------------------------------|--------|
| Harms                           | 22  | Plans for collecting, assessing, reporting, and managing solicited and spontaneously reported adverse events and other unintended effects of trial interventions or trial conduct                                                                                                   | 17, 18 |
| Auditing                        | 23  | Frequency and procedures for auditing trial conduct, if any, and whether the process will be independent from investigators and the sponsor                                                                                                                                         | n/a    |
| <b>Ethics and dissemination</b> |     |                                                                                                                                                                                                                                                                                     |        |
| Research ethics approval        | 24  | Plans for seeking research ethics committee/institutional review board (REC/IRB) approval                                                                                                                                                                                           | 18     |
| Protocol amendments             | 25  | Plans for communicating important protocol modifications (eg, changes to eligibility criteria, outcomes, analyses) to relevant parties (eg, investigators, REC/IRBs, trial participants, trial registries, journals, regulators)                                                    | n/a    |
| Consent or assent               | 26a | Who will obtain informed consent or assent from potential trial participants or authorised surrogates, and how (see Item 32)                                                                                                                                                        | 8-9    |
|                                 | 26b | Additional consent provisions for collection and use of participant data and biological specimens in ancillary studies, if applicable                                                                                                                                               | 9, 18  |
| Confidentiality                 | 27  | How personal information about potential and enrolled participants will be collected, shared, and maintained in order to protect confidentiality before, during, and after the trial                                                                                                | 18     |
| Declaration of interests        | 28  | Financial and other competing interests for principal investigators for the overall trial and each study site                                                                                                                                                                       | 22     |
| Access to data                  | 29  | Statement of who will have access to the final trial dataset, and disclosure of contractual agreements that limit such access for investigators                                                                                                                                     | 18     |
| Ancillary and post-trial care   | 30  | Provisions, if any, for ancillary and post-trial care, and for compensation to those who suffer harm from trial participation                                                                                                                                                       | n/a    |
| Dissemination policy            | 31a | Plans for investigators and sponsor to communicate trial results to participants, healthcare professionals, the public, and other relevant groups (eg, via publication, reporting in results databases, or other data sharing arrangements), including any publication restrictions | 18     |



|                            |     |                                                                                                                                                                                                |                               |
|----------------------------|-----|------------------------------------------------------------------------------------------------------------------------------------------------------------------------------------------------|-------------------------------|
|                            | 31b | Authorship eligibility guidelines and any intended use of professional writers                                                                                                                 | n/a                           |
|                            | 31c | Plans, if any, for granting public access to the full protocol, participant-level dataset, and statistical code                                                                                | n/a                           |
| <b>Appendices</b>          |     |                                                                                                                                                                                                |                               |
| Informed consent materials | 32  | Model consent form and other related documentation given to participants and authorised surrogates                                                                                             | in finnish only               |
| Biological specimens       | 33  | Plans for collection, laboratory evaluation, and storage of biological specimens for genetic or molecular analysis in the current trial and for future use in ancillary studies, if applicable | 12-15, supplementary material |

\*It is strongly recommended that this checklist be read in conjunction with the SPIRIT 2013 Explanation & Elaboration for important clarification on the items. Amendments to the protocol should be tracked and dated. The SPIRIT checklist is copyrighted by the SPIRIT Group under the Creative Commons "[Attribution-NonCommercial-NoDerivs 3.0 Unported](https://creativecommons.org/licenses/by-nc-nd/3.0/)" license.

# BMJ Open

**A Prospective Multicenter Cohort on Acute Appendicitis and Microbiota – Etiology and Effects of Antimicrobial Treatment:  
Study protocol for the MAPPAC (Microbiology Appendicitis Acuta) Trial**

|                                 |                                                                                                                                                                                                                                                                                                                                                                                                                                                                                                                                                                                                                                                                                                                                                                                                                                                                                                                                                                                                                                                                                                                                                                                                                                                                                                                                                       |
|---------------------------------|-------------------------------------------------------------------------------------------------------------------------------------------------------------------------------------------------------------------------------------------------------------------------------------------------------------------------------------------------------------------------------------------------------------------------------------------------------------------------------------------------------------------------------------------------------------------------------------------------------------------------------------------------------------------------------------------------------------------------------------------------------------------------------------------------------------------------------------------------------------------------------------------------------------------------------------------------------------------------------------------------------------------------------------------------------------------------------------------------------------------------------------------------------------------------------------------------------------------------------------------------------------------------------------------------------------------------------------------------------|
| Journal:                        | <i>BMJ Open</i>                                                                                                                                                                                                                                                                                                                                                                                                                                                                                                                                                                                                                                                                                                                                                                                                                                                                                                                                                                                                                                                                                                                                                                                                                                                                                                                                       |
| Manuscript ID                   | bmjopen-2019-031137.R1                                                                                                                                                                                                                                                                                                                                                                                                                                                                                                                                                                                                                                                                                                                                                                                                                                                                                                                                                                                                                                                                                                                                                                                                                                                                                                                                |
| Article Type:                   | Protocol                                                                                                                                                                                                                                                                                                                                                                                                                                                                                                                                                                                                                                                                                                                                                                                                                                                                                                                                                                                                                                                                                                                                                                                                                                                                                                                                              |
| Date Submitted by the Author:   | 20-Jun-2019                                                                                                                                                                                                                                                                                                                                                                                                                                                                                                                                                                                                                                                                                                                                                                                                                                                                                                                                                                                                                                                                                                                                                                                                                                                                                                                                           |
| Complete List of Authors:       | <p>Vanhatalo, Sanja; University of Turku, Institute of Biomedicine, Research Center for Cancer, Infections and Immunity; Turku University Hospital, Division of Digestive Surgery and Urology</p> <p>Munukka, Eveliina; University of Turku Faculty of Medicine; Turku University Hospital, Department of Clinical Microbiology</p> <p>Sippola, Suvi; Turku University Hospital, Division of Digestive Surgery and Urology; University of Turku, Department of Surgery</p> <p>Jalkanen, Sirpa; University of Turku, Medicity and Institute of Biomedicine</p> <p>Grönroos, Juha; Turku University Hospital, Division of Digestive Surgery and Urology; University of Turku, Department of Surgery</p> <p>Marttila, Harri; Turku University Hospital, Department of Hospital Hygiene and Infection Control</p> <p>Eerola, Erkki; University of Turku, Institute of Biomedicine, Research Center for Cancer, Infections and Immunity; Turku University Hospital, Department of Clinical Microbiology</p> <p>Hurme, Saija; University of Turku, Department of Biostatistics</p> <p>Hakanen, Antti; University of Turku, Institute of Biomedicine, Research Center for Cancer, Infections and Immunity; Turku University Hospital, Department of Clinical Microbiology</p> <p>Salminen, Paulina; Turun Yliopisto, Surgery; Turku University Hospital,</p> |
| <b>Primary Subject Heading</b>: | Gastroenterology and hepatology                                                                                                                                                                                                                                                                                                                                                                                                                                                                                                                                                                                                                                                                                                                                                                                                                                                                                                                                                                                                                                                                                                                                                                                                                                                                                                                       |
| Secondary Subject Heading:      | Infectious diseases                                                                                                                                                                                                                                                                                                                                                                                                                                                                                                                                                                                                                                                                                                                                                                                                                                                                                                                                                                                                                                                                                                                                                                                                                                                                                                                                   |
| Keywords:                       | appendicitis, appendectomy, appendicitis etiology, appendicolith, microbiota, antimicrobial resistance                                                                                                                                                                                                                                                                                                                                                                                                                                                                                                                                                                                                                                                                                                                                                                                                                                                                                                                                                                                                                                                                                                                                                                                                                                                |
|                                 |                                                                                                                                                                                                                                                                                                                                                                                                                                                                                                                                                                                                                                                                                                                                                                                                                                                                                                                                                                                                                                                                                                                                                                                                                                                                                                                                                       |

SCHOLARONE™  
Manuscripts

1  
2  
3  
4  
5  
6  
7  
8  
9  
10  
11  
12  
13  
14  
15  
16  
17  
18  
19  
20  
21  
22  
23  
24  
25  
26  
27  
28  
29  
30  
31  
32  
33  
34  
35  
36  
37  
38  
39  
40  
41  
42  
43  
44  
45  
46  
47  
48  
49  
50  
51  
52  
53  
54  
55  
56  
57  
58  
59  
60

1  
2  
3 1  
4  
5 2 **A Prospective Multicenter Cohort on Acute Appendicitis and Microbiota – Etiology and**  
6  
7  
8 3 **Effects of Antimicrobial Treatment:**  
9  
10 4 **Study protocol for the MAPPAC (Microbiology Appendicitis Acuta) Trial**  
11  
12  
13 5  
14  
15 6

16  
17 7 Vanhatalo S., MSc <sup>1,2</sup>, Munukka E., PhD <sup>3,4</sup>, Sippola S., MD <sup>2,5</sup>, Jalkanen S., MD, PhD <sup>6</sup>, Grönroos J.,  
18  
19 8 MD, PhD <sup>2,5</sup>, Marttila H., MD, PhD <sup>7</sup>, Eerola E., MD, PhD <sup>1,4</sup>, Hurme S., MSc <sup>8</sup>, Hakanen A.J., MD,  
20  
21 9 PhD <sup>1,4</sup>, Salminen P., MD, PhD <sup>2,5,9</sup>  
22  
23

- 24 10 1. Research Center for Cancer, Infections and Immunity, Institute of Biomedicine, University  
25 11 of Turku, Finland  
26 12 2. Division of Digestive Surgery and Urology, Turku University Hospital, Turku, Finland  
27 13 3. Faculty of Medicine, University of Turku, Finland  
28 14 4. Department of Clinical Microbiology, Turku University Hospital, Finland  
29 15 5. Department of Surgery, University of Turku, Turku, Finland  
30 16 6. MediCity and Institute of Biomedicine, University of Turku  
31 17 7. Department of Hospital Hygiene and Infection Control, Turku University Hospital, Turku,  
32 18 Finland  
33 19 8. Department of Biostatistics, University of Turku, Turku, Finland  
34 20 9. Satasairaala Central Hospital, Pori, Finland  
35  
36  
37  
38  
39  
40  
41  
42  
43  
44

45 25 Correspondence:

46  
47 26 Paulina Salminen, MD, PhD  
48 27 Division of Digestive Surgery and Urology  
49 28 Turku University Hospital  
50 29 Kiinamylynkatu 4-8, 20520 Turku, Finland  
51 30 Tel. +358 2 313 0542, +358 40 718 1896  
52 31 Fax. +358 2 313 2284  
53 32 E-mail: [paulina.salminen@tyks.fi](mailto:paulina.salminen@tyks.fi)  
54  
55  
56  
57

58 34 Word count: 4145  
59  
60

**ABSTRACT**

**Introduction:** Based on epidemiological and clinical data acute appendicitis can present either as uncomplicated or complicated. The etiology of these different appendicitis forms remains unknown. Antibiotic therapy has been shown to be safe, efficient and cost-effective for computed tomography (CT) confirmed uncomplicated acute appendicitis. Complicated acute appendicitis most often requires emergency appendectomy. Despite appendicitis being one of the most common surgical emergencies, there are very few reports on appendicitis etiology and pathophysiology focusing on the differences between uncomplicated and complicated appendicitis. MAPPAC trial aims to evaluate these microbiological and immunological aspects including immune response in the etiology of these different forms also assessing both antibiotics non-responders and appendicitis recurrence. In addition, MAPPAC also aims to determine antibiotic and placebo effects on gut microbiota composition and antimicrobial resistance.

**Methods and analysis:** MAPPAC is a prospective clinical trial with both single- and multicentre arm conducted in close synergy with concurrent trials APPAC II (p.o. vs. i.v+p.o. antibiotics, NCT03236961) and APPAC III (double-blind trial placebo vs. antibiotics, NCT03234296) randomized clinical trials. Based on the enrolment for these trials, patients with CT-confirmed uncomplicated acute appendicitis are recruited also to the MAPPAC study. In addition to these conservatively treated randomized patients with uncomplicated acute appendicitis, MAPPAC will recruit patients with uncomplicated and complicated appendicitis undergoing appendectomy. Rectal and appendiceal swabs, appendicolith, faecal, and serum samples, appendiceal biopsies, and clinical data are collected during the hospital stay for microbiological and immunological analysis in both study arms with the longitudinal study arm collecting fecal samples also during follow-up up to 12 months after appendicitis treatment.

1  
2  
3 59 **Ethics and dissemination:** This study has been approved by the Ethics Committee of the  
4  
5 60 Hospital District of Southwest Finland (Turku University Hospital) and the Finnish Medicines  
6  
7  
8 61 Agency (Fimea). Results of the trial will be published in peer-reviewed journals.  
9

10 62 **Trial registration:** Eudra-CT: 2016-003655-29 (2017-01-12), [clinicaltrials.gov](http://clinicaltrials.gov) NCT03257423.  
11  
12  
13 63  
14  
15 64

16 65 **KEYWORDS**

17  
18 66 Appendicitis, appendectomy, appendicitis etiology, appendicolith, microbiota, antimicrobial  
19  
20  
21 67 resistance  
22  
23 68  
24  
25 69  
26 70  
27  
28  
29  
30  
31  
32  
33  
34  
35  
36  
37  
38  
39  
40  
41  
42  
43  
44  
45  
46  
47  
48  
49  
50  
51  
52  
53  
54  
55  
56  
57  
58  
59  
60

### 71 **Strengths and limitations of this study**

- 72 - To our knowledge, MAPPAC (Microbiology APPendicitis ACuta) is the first prospective  
73 trial comparing the role of microbiology and immunology including immune response  
74 in the etiology of uncomplicated and complicated acute appendicitis in a large patient  
75 cohort consisting of CT-diagnosed patients also specifically evaluating appendicoliths  
76 and recurrent appendicitis after initial successful conservative treatment.
- 77 - The strong synergy between two ongoing randomized clinical trials (APPAC II and  
78 APPAC III) enabling a large prospective patient cohort of acute appendicitis patients  
79 with associated clinical data to be assessed with the microbiological and immunological  
80 findings.
- 81 - The application of next generation sequencing combined with traditional culturing  
82 methods will provide extensive information about the microbiological factors in the  
83 etiology of complicated and uncomplicated acute appendicitis also presenting a  
84 challenge in differentiating between etiologic and non-etiological microbiota in the  
85 specimens.
- 86 - The comprehensive approach of the MAPPAC study acquiring a large set of samples in  
87 the emergency surgery setting presents a challenge to surgeons on call and some  
88 patients may not have all study samples available.

## 96 INTRODUCTION

97 Acute appendicitis is one of the most common causes of abdominal pain in emergency  
98 departments. The lifetime risk of acute appendicitis in males is 8.6% and 6.7% in females [1]  
99 with recent meta-analysis showing an increasing trend in appendicitis incidence in the  
100 industrialised countries [2]. Based on epidemiological and clinical data, acute appendicitis can  
101 present either as uncomplicated or complicated with the majority of cases being  
102 uncomplicated.

103 The different epidemiological trends of uncomplicated and complicated acute appendicitis  
104 indicate different pathophysiology [3]. Despite the high incidence of acute appendicitis, there  
105 are very few reports on appendicitis etiology and pathophysiology especially focusing on the  
106 possible differences between uncomplicated and complicated acute appendicitis. Complicated  
107 acute appendicitis, defined as a finding of perforation, appendicolith, abscess or a suspicion of  
108 tumor, requires emergency appendectomy. Appendicolith is a calcified faecal concretion in  
109 the appendix and it is the most common form of complicated acute appendicitis. Even though  
110 the first thorough study on appendicoliths was already reported in 1966 [4], information  
111 about appendiceal calculi is scarce. Obstruction of the appendiceal lumen caused by an  
112 appendicolith, lymphoid hyperplasia, or swelling has been evaluated to be the primary cause  
113 of appendicitis and bacterial overgrowth has been considered a consequence [5]. However,  
114 bacterial infection has also been proposed as the primary cause of appendicitis [6, 7].  
115 *Bacteroides* species are reported to be one of most common bacterial findings in appendicitis  
116 [8, 9]. Further, certain members of the *Fusobacteria*, especially *F. nucleatum* and *F.*  
117 *necrophorum*, are present in most appendicitis samples [6]. The most common aerobic  
118 bacteria organism detected by culturing is *Escherichia coli*, but also *Klebsiella pneumoniae*,  
119 *Streptococcus spp.*, *Enterococcus spp.* and *Pseudomonas aeruginosa* have been reported [10,  
120 11]. To our knowledge, only one study with a very small number of patients has characterised



1  
2  
3 121 the adult appendiceal microbiota profile with next generation sequencing (NGS) methods.  
4  
5 122 Appendix seems to have diverse microbiota including both commensal species from gut  
6  
7  
8 123 microbiota (GM) and opportunistic pathogens [12, 13]. Since the interindividual variability  
9  
10 124 in the microbial composition of the appendix samples is high [12], a larger number of  
11  
12 125 appendicitis patients is needed to draw the microbiological conclusions. Since most of the  
13  
14  
15 126 species identified from the appendix with both culturing and NGS methods can also be part of  
16  
17 127 normal gut microbiota it is challenging to determine their role in the infection [14]. In  
18  
19  
20 128 addition, the immune response and predisposition for infection by specific bacteria varies  
21  
22 129 between individuals. Consequently, innate immunity is considered to be a contributing factor  
23  
24 130 in the development of complicated appendicitis [15]. In conclusion, several factors have been  
25  
26  
27 131 proposed to take part in the development of appendicitis, most importantly obstruction of the  
28  
29 132 lumen and bacterial infection with this research largely focusing on complicated acute  
30  
31 133 appendicitis [5-7, 16, 17].  
32  
33  
34 134 Antimicrobials decrease GM diversity, richness and species variation, and cause a perturbation  
35  
36 135 in its overall balance. Particularly broad-spectrum antibiotics have been shown to have a long-  
37  
38  
39 136 term effect on GM profile. [18, 19] A prolonged disturbance in GM and the following imbalance  
40  
41 137 with the host and its immune system have been associated with a variety of diseases, such as  
42  
43 138 inflammatory bowel disease [20] and type 2 diabetes [21]. Antibiotic use can further lead to  
44  
45  
46 139 increased prevalence of antibiotic resistant bacteria and antibiotic resistance genes [22-24].  
47  
48 140 Although the effects of antibiotic treatment on the development of antimicrobial resistance  
49  
50 141 (AMR) development is less clear in countries with lower prevalence of resistant bacteria [25,  
51  
52  
53 142 26], the evaluation of antibiotic treatment effects on GM is essential in the treatment of acute  
54  
55 143 appendicitis.  
56  
57  
58  
59  
60

1  
2  
3  
4  
5  
6  
7  
8  
9  
10  
11  
12  
13  
14  
15  
16  
17  
18  
19  
20  
21  
22  
23  
24  
25  
26  
27  
28  
29  
30  
31  
32  
33  
34  
35  
36  
37  
38  
39  
40  
41  
42  
43  
44  
45  
46  
47  
48  
49  
50  
51  
52  
53  
54  
55  
56  
57  
58  
59  
60

144 Appendectomy has unquestionably been the standard treatment for acute appendicitis for over  
145 a century with more than 300 000 appendectomies performed annually in the United States  
146 [3]. The original APPAC (APPendicitis ACuta) trial reported that at long-term follow-up, the  
147 majority of patients with computed tomography (CT) confirmed uncomplicated acute  
148 appendicitis were successfully treated with antibiotics, and those patients that required later  
149 appendectomy did not have increased or major complications [27, 28]. Antibiotic therapy for  
150 CT-confirmed uncomplicated acute appendicitis has been shown to be safe, efficient and cost-  
151 effective both in adult and paediatric patients [29-33]. APPAC II trial aims to optimise antibiotic  
152 treatment for CT confirmed uncomplicated acute appendicitis in order to both shorten the  
153 hospital stay and restrict the antibacterial spectrum. The APPAC III trial aims to assess  
154 symptomatic treatment of uncomplicated acute appendicitis and the role of antibiotics in the  
155 resolution of uncomplicated appendicitis. The MAPPAC (Microbiology APPendicitis ACuta) trial  
156 patient enrolment is based on the ongoing APPAC II and APPAC III randomised multicentre  
157 clinical trials of our study group. To our knowledge, there are so far no similar large  
158 microbiological studies focusing on acute appendicitis performed in conjunction with large  
159 clinical trials with prospective access to both uncomplicated and complicated appendicitis  
160 patients. MAPPAC trial aims to evaluate the possible role and differences in the microbiological  
161 etiology of complicated and uncomplicated appendicitis with a special reference to the  
162 presence of an appendicolith. In addition, MAPPAC aims to evaluate the immunological and  
163 microbiological factors involved in appendicitis recurrence after successful initial antibiotic  
164 therapy. In the longitudinal study arm we also aim to assess the effects of antibiotic and placebo  
165 treatment on the GM profile and the effects of hospital stay duration on the AMR reservoir of  
166 the GM.

1  
2  
3  
4  
5  
6  
7  
8  
9  
10  
11  
12  
13  
14  
15  
16  
17  
18  
19  
20  
21  
22  
23  
24  
25  
26  
27  
28  
29  
30  
31  
32  
33  
34  
35  
36  
37  
38  
39  
40  
41  
42  
43  
44  
45  
46  
47  
48  
49  
50  
51  
52  
53  
54  
55  
56  
57  
58  
59  
60

## 168 **METHODS AND ANALYSIS**

### 169 **Study Design**

170 MAPPAC is a prospective clinical trial with a single-centre and a multicentre arm. The single-  
171 centre study arm at Turku University Hospital, aims to determine the possible differences in  
172 the etiology of complicated and uncomplicated acute appendicitis with a special reference to  
173 the role and etiology of appendicolith. In the multi-centre longitudinal arm, MAPPAC trial  
174 concentrates on assessment of possible immunological and microbiological factors involved  
175 in initial non-responders or appendicitis recurrence after successful initial antibiotic therapy  
176 at long-term follow-up. In this longitudinal multicentre study arm we also aim to evaluate the  
177 effects of antibiotic and placebo treatment on the GM and the effects of the duration of the  
178 hospital stay on the possible AMR reservoir within the GM. MAPPAC protocol was drafted in  
179 accordance with the SPIRIT statement [34]. The trial has been registered at both EudraCT  
180 (2016-003655-29) and clinicaltrials.gov (NCT03257423).

181 The three ongoing study entities (APPAC II, APPAC III, and MAPPAC) are strongly  
182 interconnected having a common study aim and a patient enrolment population (Figure 1).  
183 APPAC II trial is a randomised open-label, non-inferiority multicentre trial to compare  
184 intravenous antibiotic therapy followed by per oral (p.o.) antibiotics with p.o. monotherapy  
185 in the treatment of uncomplicated acute appendicitis (NCT03236961)[35]. APPAC III trial is a  
186 randomised double-blind, placebo-controlled, superiority multicentre study to compare  
187 antibiotic therapy with placebo in the treatment of uncomplicated acute appendicitis  
188 (NCT03234296) [36]. All incoming patients are informed of all ongoing trials. All patients  
189 invited to participate in APPAC II and III trials will be invited to participate in the MAPPAC  
190 trial. Patients recruited for the APPAC II or III trial are asked to sign a separate consent form  
191 for the MAPPAC trial allowing for the use of their data and collection of microbiological  
192 samples. The study flow is illustrated in Figure 2.

1  
2  
3  
4  
5  
6  
7  
8  
9  
10  
11  
12  
13  
14  
15  
16  
17  
18  
19  
20  
21  
22  
23  
24  
25  
26  
27  
28  
29  
30  
31  
32  
33  
34  
35  
36  
37  
38  
39  
40  
41  
42  
43  
44  
45  
46  
47  
48  
49  
50  
51  
52  
53  
54  
55  
56  
57  
58  
59  
60

### 193 **Patient selection**

194 Eligible for inclusion are all adult patients 18 – 60 years old presenting with either a CT-  
195 confirmed uncomplicated or complicated appendicitis or patients with a suspected recurrent  
196 appendicitis after initial successful antibiotic therapy for uncomplicated acute appendicitis.  
197 MAPPAC single-centre arm will enroll patients with both uncomplicated (both APPAC II and  
198 III trials and patients declining to participate in these trials undergoing appendectomy) and  
199 complicated acute appendicitis (patients excluded from APPAC II and APPAC III trials) at  
200 Turku University Hospital. The enrolment of uncomplicated acute appendicitis patients  
201 participating in the APPAC III trials will be performed at all APPAC III hospitals (all five Finnish  
202 university hospitals: Turku, Helsinki, Tampere, Oulu, and Kuopio). In addition, all of the  
203 APPAC II and III trial patients having to undergo appendectomy either for a treatment failure  
204 during the primary hospitalisation or for suspected recurrence after a successful initial non-  
205 operative treatment will be enrolled in the MAPPAC trial at all ten study hospitals (all five  
206 university and five central hospitals in Finland: Jyväskylä, Pori, Mikkeli, Seinäjoki and  
207 Rovaniemi).

208

209

210

### 211 **Study setting and feasibility**

212 The study was initiated at Turku University Hospital in April 2017, with the study  
213 commencing at all study centres by fall 2017. The majority of MAPPAC patient enrolment is  
214 evaluated to be completed in conjunction with the APPAC II and III trials latest by fall 2020.  
215 Patient recruitment in the MAPPAC trial will continue for a minimum of five years after APPAC  
216 II and III trial enrolment completion based on the planned microbiological assessment of late  
217 appendicitis recurrence.

1  
2  
3  
4  
5  
6  
7  
8  
9  
10  
11  
12  
13  
14  
15  
16  
17  
18  
19  
20  
21  
22  
23  
24  
25  
26  
27  
28  
29  
30  
31  
32  
33  
34  
35  
36  
37  
38  
39  
40  
41  
42  
43  
44  
45  
46  
47  
48  
49  
50  
51  
52  
53  
54  
55  
56  
57  
58  
59  
60

## 218 **Interventional groups**

219 Four interventional groups within MAPPAC are defined as follows:

- 220 1. Patients with uncomplicated acute appendicitis participating in the APPAC II trial at  
221 Turku University Hospital (MAPPAC single-centre treatment arm) receiving either i.v.  
222 antibiotic therapy followed by p.o. antibiotics (i.v. + p.o.) or patients receiving p.o.  
223 antibiotic monotherapy (p.o.). *I.v. + p.o.* group receives intravenous ertapenem 1 g once  
224 daily for two days followed by p.o. levofloxacin 500 mg once daily and metronidazole  
225 500 mg three times per day for 5 days. *P.o.* group receives *p.o.* moxifloxacin 400 mg  
226 once daily for seven days.
- 227 2. Patients with uncomplicated acute appendicitis participating in the double-blinded  
228 APPAC III trial at all five university hospitals (MAPPAC multicentre treatment arm)  
229 receiving either antibiotic therapy or placebo treatment. *Antibiotic treatment* is  
230 intravenous ertapenem 1 g once per day for three days followed by p.o. levofloxacin  
231 500 mg once per day and metronidazole 500 mg three times per day for four days.  
232 *Placebo treatment* entails intravenous placebo once per day for three days followed by  
233 per oral placebo three times per day for four days.
- 234 3. Patients with uncomplicated acute appendicitis or suspected recurrent appendicitis  
235 undergoing appendectomy  
236 The patients in this group will undergo laparoscopic appendectomy either after  
237 declining to participate in the APPAC II or APPAC III trials (MAPPAC single-centre  
238 treatment arm at Turku University Hospital) or after suspected treatment failure of  
239 non-operative treatment or after presenting with suspected appendicitis recurrence  
240 after initial successful non-operative treatment (MAPPAC multicentre treatment arm,  
241 all APPAC II and APPAC III hospitals)
- 242 4. Patients with complicated acute appendicitis undergoing appendectomy

1  
2  
3 243 The patients in this group will undergo laparoscopic appendectomy and are eligible for  
4  
5 244 enrolment only in the MAPPAC single-centre study arm at Turku University Hospital.  
6  
7

8 245  
9  
10 246 **Sample collection**

11  
12 247 **Rectal swabs** are collected from all patients in the emergency department prior to antibiotic  
13  
14  
15 248 treatment or surgery (timepoint 0). Further, rectal swabs are collected on the 1<sup>st</sup> day for  
16  
17 249 APPAC II patients and for APPAC III patients on the 1<sup>st</sup> day (Turku University Hospital) and  
18  
19 250 on the 3<sup>rd</sup> day (all five university hospitals). At each time point, two rectal swabs are collected:  
20  
21  
22 251 Amies-Coal transport swab for culturing methods (Sarstedt, Nümbrecht, Germany) and  
23  
24 252 Puritan DNA/RNA swab (Puritan Medical products, Guilford, Maine) with shield fluid (Zymo  
25  
26 253 Research, Irvine, Canada) for microbial DNA extraction. The shield fluid in this collection tube  
27  
28  
29 254 allows the transportation at room temperature.

30  
31 255 **Samples from the appendix** are collected from patients undergoing appendectomy for  
32  
33 256 complicated or uncomplicated acute appendicitis and from patients with suspected disease  
34  
35  
36 257 progression during the primary hospitalisation or appendicitis recurrence after successful  
37  
38 258 initial non-operative therapy. Samples include routine histology as well as specific trial swabs  
39  
40  
41 259 and biopsies. The appendix is opened vertically with a sterile scalpel and two swabs are taken  
42  
43 260 similar to the rectal swab (one for culture and one for DNA extraction). Three biopsies are  
44  
45 261 taken at a distance of approximately 2 cm from the base of the appendix. All biopsies are  
46  
47  
48 262 stored at -75 °C, one immediately and the rest two are first embedded in RNAlater solution  
49  
50 263 (Thermo Fisher Scientific, Waltham, MA, USA). Possible appendicoliths are collected into a  
51  
52 264 sterile container, frozen and stored at -75 °C. If appendectomy is performed during office  
53  
54  
55 265 hours, appendiceal samples are collected by study personnel and an additional swab for  
56  
57 266 anaerobic culture is then collected and cultured in connection with collection and  
58  
59  
60 267 immediately transferred into an anaerobic jar. During on call hours, the samples are collected

1  
2  
3 268 by surgeons and the -75 °C appendiceal biopsy may not be collected. These appendiceal  
4  
5  
6 269 samples are collected only in the Turku University Hospital and at the other study hospitals  
7  
8 270 only a swab sample (transport tube with DNA shield fluid) from the appendix of non-  
9  
10 271 responders and patients with appendicitis recurrence is collected.

11  
12  
13 272 **Additional serum samples** are collected from all the patients recruited in MAPPAC trial at  
14  
15 273 Turku University Hospital and for APPAC III trial at all five study hospitals for the  
16  
17 274 identification of possible disease-form specific inflammatory biomarkers in serum. The serum  
18  
19  
20 275 samples are divided into six aliquots prior freezing at -75 °C.

### 21 22 276 **Questionnaire**

23  
24 277 MAPPAC patients are asked to fill a primary questionnaire during the initial hospitalisation  
25  
26  
27 278 covering topics possibly affecting their GM profile: chronic diseases, special diets, smoking  
28  
29 279 and alcohol consumption, travel history, antibiotic intake, other medications (12 months  
30  
31 280 prior the sampling), consumption of probiotics and other dietary supplements, recent  
32  
33 281 diarrhoea and/or vomiting, Bristol stool form scale estimate [37] measuring stool consistency  
34  
35  
36 282 (1 for very hard stool to 7 for diarrhoea) and the average number of defecations per day.

### 37 38 283 **Follow-up during the hospitalisation**

39  
40  
41 284 During the hospitalisation the following parameters will be recorded every 24 hours: pain  
42  
43 285 assessed by Visual Analogue Scale (VAS), leukocyte count, C-reactive protein (CRP),  
44  
45 286 temperature and clinical findings at patient reassessment. If the patient is suspected of not  
46  
47  
48 287 responding to the randomized therapy based on clinical deterioration signs combined with  
49  
50 288 laboratory findings (signs of peritonitis, persisting fever, increasing pain, white blood cell  
51  
52 289 count or CRP), the patient will be operated based on the surgeon's decision and the reasons  
53  
54  
55 290 for proceeding to appendectomy will be recorded. For appendectomy, laparoscopic approach  
56  
57 291 is recommended. The operative findings and the histopathology of the appendix will be  
58  
59  
60 292 recorded. After the initial hospitalisation, recurrent acute appendicitis will be diagnosed on a

1  
2  
3 293 clinical basis and patients with a suspected recurrence of appendicitis will undergo a  
4  
5 294 laparoscopic appendectomy.

### 8 295 **Follow-up**

10 296 The specific MAPPAC trial follow-up is conducted for patients also participating in the APPAC  
11  
12 297 II and III trials with collection of three faecal samples at home (at one week, six months and  
13  
14  
15 298 one year). Follow-up samples at home are not collected in MAPPAC interventional groups  
16  
17 299 undergoing appendectomy. The follow-up faecal sample is collected into 10 ml DNA/RNA  
18  
19 300 Shield Faecal Collection Tube (Zymo Research) enabling transportation and storage at room  
20  
21  
22 301 temperature prior to DNA extraction. Patients also deliver a faecal sample into a gel tube for  
23  
24 302 culture purposes. A follow-up questionnaire is collected at 6 and 12 months consisting of the  
25  
26 303 same questions as the preliminary questionnaire covering the time between hospital  
27  
28  
29 304 discharge and the follow-up time point. Other follow-up for patients in APPAC II trial will  
30  
31 305 include a phone interview at one week after discharge, APPAC III trial patients have their first  
32  
33 306 follow-up call 2-4 days after discharge from the hospital and then at 10 days, both trials at two  
34  
35  
36 307 months and at one, three, five and ten years. The follow-up for APPAC III patients will include  
37  
38 308 laboratory tests (leukocyte count, CRP, additional follow-up serum samples).

### 43 310 **Outcome parameters**

45 311 Based on the MAPPAC trial design, no specific primary endpoint can be determined. The  
46  
47 312 following parameters will be recorded for all patients: age, gender, Body mass index, clinical  
48  
49  
50 313 findings on admission (tympanic temperature, nausea, pain or tenderness in the right lower  
51  
52 314 abdominal quadrant, pain migration, VAS pain scores, white blood cell count, CRP, findings on  
53  
54  
55 315 CT imaging), and data on primary and follow-up questionnaires. Blood cultures will be  
56  
57 316 obtained from patients with complicated acute appendicitis and for APPAC II and III trial  
58  
59 317 patients at Turku University Hospital.



1  
2  
3  
4  
5  
6  
7  
8  
9  
10  
11  
12  
13  
14  
15  
16  
17  
18  
19  
20  
21  
22  
23  
24  
25  
26  
27  
28  
29  
30  
31  
32  
33  
34  
35  
36  
37  
38  
39  
40  
41  
42  
43  
44  
45  
46  
47  
48  
49  
50  
51  
52  
53  
54  
55  
56  
57  
58  
59  
60

318 The following outcome parameters will be assessed based on the sample types collected:

319 *Parameters from the appendix i.e. patients undergoing appendectomy*

320 Operative details and histopathology of the appendix, host transcriptomics, proteomics, and  
321 immunohistochemical analysis from appendiceal biopsy, possible appendicolith composition,  
322 morphology, and classification.

323 *Microbiological parameters from the rectal and appendiceal swabs, faecal and appendiceal*  
324 *samples*

325 Microbial profile, metagenome and metatranscriptome, name of different identified bacterial  
326 species, number of species identified both by NGS and culture methods, antimicrobial  
327 susceptibility test results, the presence of AMR related genes by molecular analysis methods,  
328 bacterial genome data of AMR or virulence genes, all microbial data combined with clinical and  
329 additional data.

330 *Serum samples*

331 In order to compare possible differences between patients with successful antibiotic therapy  
332 to patients with either failed antibiotic therapy or complicated acute appendicitis, the serum  
333 samples will be analysed to identify possible inflammatory or immunological markers.  
334 Different cytokines, chemokines and growth factors as well as serum metabolome will be  
335 included in these analyses. Additional analysis include the level and activity of CD73 and  
336 soluble vascular adhesion protein-1 (VAP-1). List for analytes that will be screened is  
337 provided in the supplementary methods.

338  
339 Laboratory methods used in the trial to analyse the collected samples are described in detail  
340 in the online supplementary material.

1  
2  
3 343 **Statistical analysis**

4  
5 344 Based on the explorative research nature of the MAPPAC study, there is not enough  
6  
7  
8 345 information available about the study aims to enable sample size calculations. Categorical  
9  
10 346 variables of the study will be characterised using frequencies and percentages. For continuous  
11  
12 347 variables means and standard deviations or medians with range and 25th and 75th  
13  
14  
15 348 percentiles will be used. In case of categorical outcomes, groups will be compared using  
16  
17 349 Pearson's Chi-squared -test and if further analyses will be needed, logistic regression models  
18  
19  
20 350 will be used. Group differences in continuous variables will be evaluated using independent  
21  
22 351 samples t-test, analysis of variance (ANOVA) or non-parametric methods, if needed.  
23  
24 352 Associations between continuous variables will be evaluated using correlation coefficients  
25  
26 353 and linear regression analysis and if adjustments are needed, linear models will be used.  
27  
28  
29 354 Continuous outcomes measured in several time-points will be analysed using linear mixed  
30  
31 355 models. For categorical outcomes with repeated measurements generalised linear mixed  
32  
33 356 models will be used. The assumptions of the methods will be checked for justification of the  
34  
35  
36 357 analyses and transformations will be used for the variables, if needed. The study site  
37  
38 358 differences will be evaluated in statistical models and if major differences are detected, more  
39  
40  
41 359 complicated statistical models will be used in the analyses. Two-sided p-values will be used  
42  
43 360 and p-values less than 0.05 will be considered statistically significant. The measurements with  
44  
45 361 missing data will automatically be excluded from the analyses of the variables in concern.  
46  
47  
48 362 Statistical analyses will be performed using SAS System for Windows, Version 9.4 and JMP Pro  
49  
50 363 13 or later versions (SAS Institute, Cary, NC, USA).

51  
52 364

53  
54  
55 365 **Patients and public involvement**

56  
57 366 The MAPPAC research questions and outcome measures were based on the results of original  
58  
59 367 APPAC trial [27] and the study protocol was developed together with the study group  
60

1  
2  
3 368 surgeons, clinical microbiologists and immunologists. Patients were not directly involved in  
4  
5 369 the design of this study and the burden of study participation was not assessed by patients  
6  
7  
8 370 themselves. Upon recruitment, patients are well informed of all aspects of the trial including  
9  
10 371 antibiotic or symptomatic therapy of CT-confirmed uncomplicated acute appendicitis,  
11  
12 372 difference between complicated and uncomplicated acute appendicitis, treatment success,  
13  
14  
15 373 possible late recurrence, and safety in order to help patients make an informed decision about  
16  
17 374 trial participation. Patients also receive additional instructions in a phone call made prior to  
18  
19  
20 375 follow-up sample collection at 6 and 12 months. After completion of data collection and  
21  
22 376 analysis, the patients will be informed of the study results and they will be provided with an  
23  
24 377 opportunity to ask further questions.  
25

26 378

27

28

29 379

30

31 380

32

33

34 381

35

36 382

37

38 383

39

40

41 384

42

43 385

44

45 386

46

47

48 387

49

50 388

51

52 389

53

54

55 390

56

57 391

58

59 392

60

## **ETHICS AND DISSEMINATION**

### **Ethics**

This protocol has been accepted by the Ethical Committee of the Hospital district of Southwest Finland (Turku University Hospital) and Finnish Medicines Agency (Fimea). The trial will be conducted in compliance with the Declaration of Helsinki.

### **Data collection and confidentiality**

All data and samples are handled confidentially and the information in the datasets is non-identifiable. Data are gathered during the emergency room visit, hospitalisation for acute appendicitis, clinical observations, and follow-up phone calls. The main investigators will be in charge of the common database with full access to the data which is, otherwise strictly limited. As the MAPPAC and APPAC II and III trials are based on the same patient population, the interventions partly overlap and the enrolled patients are informed about this overlapping of the trials and the acquired data.

1  
2  
3  
4  
5  
6  
7  
8  
9  
10  
11  
12  
13  
14  
15  
16  
17  
18  
19  
20  
21  
22  
23  
24  
25  
26  
27  
28  
29  
30  
31  
32  
33  
34  
35  
36  
37  
38  
39  
40  
41  
42  
43  
44  
45  
46  
47  
48  
49  
50  
51  
52  
53  
54  
55  
56  
57  
58  
59  
60

### 393 **Withdrawal**

394 Patients are informed of their right to withdraw from the study without explanation at any  
395 time. In case of patient withdrawal, they will be asked for permission to use their data.

### 396 **Dissemination plan**

397 Results from this trial and reported in articles which will be published in peer-reviewed  
398 journals. Results are also presented at national and international conferences to further  
399 distribute this research.

For peer review only

1  
2  
3  
4  
5  
6  
7  
8  
9  
10  
11  
12  
13  
14  
15  
16  
17  
18  
19  
20  
21  
22  
23  
24  
25  
26  
27  
28  
29  
30  
31  
32  
33  
34  
35  
36  
37  
38  
39  
40  
41  
42  
43  
44  
45  
46  
47  
48  
49  
50  
51  
52  
53  
54  
55  
56  
57  
58  
59  
60**DISCUSSION**

As non-operative treatment for uncomplicated acute appendicitis has been shown to be efficient and safe also at long-term [27-30, 33, 38] and cost-effective [39], understanding both the etiology of the different appendicitis forms and potentially predicting the recurrences has become of utmost clinical importance in order to thoroughly evaluate all the optimization of the different treatment options. The MAPPAC trial aims to assess this largely unknown microbiological etiology of the different disease forms of acute appendicitis. Further, the whole microbial entity i.e. profile both in the appendix and in gut is studied, and their role in the disease severity and form is assessed. In addition, the effects of antibiotic and placebo treatments on the GM profile and the effects of the duration of the hospital stay on the AMR reservoir of the GM will be assessed. With the longitudinal study design, both the immediate and long-term effects of the antibiotic treatment on GM can be analysed. As the hospital stay differs in APPAC II and APPAC III patients, the effects of the duration of the hospital stay on the emergence of resistant bacteria and AMR reservoir can be evaluated. Moreover, the comparison of the effects of antibiotic treatment on GM between two different administration routes (p.o. and i.v. + p.o.) is possible.

In the 5-year follow up of the original APPAC trial, 39 % (n=100) of the antibiotic group patients underwent appendectomy for either during the primary hospitalization or for suspected late appendicitis recurrence. Out of these hundred patients, 85 were operated on for suspected recurrence and 78 patients had a histopathologically confirmed acute appendicitis [28]. Understanding the pathophysiology and contributing factors in recurrent appendicitis are of vital clinical importance in evaluating the optimal treatment paradigms for uncomplicated acute appendicitis. Therefore, MAPPAC trial is assessing both initial non-responders to antibiotic therapy and recurrent appendicitis after successful initial antibiotic treatment and

1  
2  
3  
4  
5  
6  
7  
8  
9  
10  
11  
12  
13  
14  
15  
16  
17  
18  
19  
20  
21  
22  
23  
24  
25  
26  
27  
28  
29  
30  
31  
32  
33  
34  
35  
36  
37  
38  
39  
40  
41  
42  
43  
44  
45  
46  
47  
48  
49  
50  
51  
52  
53  
54  
55  
56  
57  
58  
59  
60

442 these results may provide novel tools to predict the potential recurrence risk and thus help to  
443 assess the optimal treatment choice for patients with uncomplicated acute appendicitis.

### 444 **Strengths and limitations**

445 MAPPAC has a strong synergy between APPAC II and III studies enabling the enrolment of both  
446 uncomplicated and complicated acute appendicitis patients in a large prospective series with  
447 associated clinical data to be assessed in conjunction with the microbiological and  
448 immunological findings. In many aspects, MAPPAC is an exploratory study of possible  
449 associations of whole microbial community and host immune characteristics with  
450 uncomplicated vs. complicated appendicitis and antibiotic response among patients in clinical  
451 trials treated with and without antibiotics. MAPPAC trial aims to generate hypotheses to better  
452 understand the role of disease progression and host susceptibility for future studies; i.e.  
453 determination of one primary outcome is insufficient for the study, as several factors are  
454 indispensable for the understanding of etiology and the effects of antibiotics on GM all provided  
455 with this unique set of microbiological samples. To our knowledge, only one previous study  
456 [12] has characterized the adult appendix microbiota during appendicitis in adult patients  
457 using NGS technique and to date no reports on the structure and physicochemical contents of  
458 appendicoliths exists. Using these assessments is a strength in our study. Further, to our  
459 knowledge this is the first trial aiming to prospectively assess the possible microbiological  
460 and/or immunological etiology of appendicitis recurrence after a successful initial conservative  
461 treatment with antibiotics or symptomatic therapy and primary non-responders to  
462 conservative treatment of uncomplicated acute appendicitis. One of the main hypothesis of the  
463 MAPPAC study is that the microbial composition of appendix differs between CT differentiated  
464 complicated and uncomplicated appendicitis. Therefore, strong element of the study is that all  
465 patients included in the study are imaged with CT protocol. CT scan is the gold standard for

1  
2  
3 466 acute appendicitis imaging and this near perfect accuracy of CT adds to the reliability of the  
4  
5 467 clinical data and appendicitis severity also in the patients with uncomplicated acute  
6  
7  
8 468 appendicitis without a histopathological confirmation of the appendix.

9  
10 469 The study limitations include the difficult challenge of conducting prospective clinical trials in  
11  
12 470 the emergency setting. It is expected that all eligible patients may not be evaluated for  
13  
14  
15 471 enrolment or some patients may not have all study samples available as the recruitment is  
16  
17 472 performed by a large number of surgeons on call. The lack of healthy control group is a  
18  
19  
20 473 limitation in the study regarding both the etiology and in determining the effects of antibiotics  
21  
22 474 on GM, as the results cannot be fully distinguished from the effects of acute appendicitis.

23  
24 475

25  
26  
27 476

28  
29 477

30  
31 478

32  
33  
34 479

35  
36 480

37  
38 481

39  
40  
41 482

42  
43 483

44  
45 484

46  
47  
48 485

49  
50 486

51  
52 487

53  
54  
55 488

56  
57 489

58  
59 490

60

### 491 **Authors' contributions**

492 All authors have contributed to the design of this trial protocol. PS is the chief investigator. PS,  
493 SV, AJH, EM, SJ, JG, and SS have initiated the project. The protocol was drafted by PS, which  
494 was refined by SV, AJH, EM, SS, SJ, JG, HM, EE, and SH. Statistical advice was provided by SH.  
495 SV was responsible for drafting the manuscript, which was refined by PS, AJH, and EM. All  
496 authors have read and approved the final manuscript.

497 In addition, The APPAC collaborative study group lead by primary investigator Paulina  
498 Salminen includes the following contributors: Sallinen V., Leppäniemi A., Rautio T., Meriläinen  
499 S., Nordström P., Laukkarinen J., Rantala T., Savolainen H., Aarnio M., Mattila A., Haijanen J.,  
500 Sävelä E-L., Imre I., Paajanen H., Rintala J., Pinta T., Sippola T., and Böckerman P. All  
501 contributors are local investigators who are responsible for execution of the APPAC II and/or  
502 APPAC III trials in addition to execution of the applicable parts of the MAPPAC trial and valid  
503 data gathering. They have all read and approved the final manuscript and they will be included  
504 in the future MAPPAC trial reports, when applicable. The surgical departments of the  
505 following Finnish Hospitals contribute to the execution of this trial: University hospitals of  
506 Turku, Helsinki, Oulu, Tampere, and Kuopio, central hospitals of Jyväskylä, Pori, Mikkeli,  
507 Seinäjoki, and Rovaniemi.

### 508 **Funding**

509 This work was supported by clinical research grants from Sigrid Juselius foundation, the  
510 Academy of Finland, Mary and Georg C. Ehrnrooth foundation, The Maud Kuistila Memorial  
511 Foundation, Doctoral Programme of Clinical Investigation of University of Turku, Tyks-Sapa  
512 Research Funds, Finland, Turku University and Turku University foundation. This is a  
513 researcher oriented trial.

### 514 **Competing interests**

515 Authors declare they have no competing interests.



1  
2  
3 516 **Acknowledgements**

4  
5 517 Due to the multicentre nature of the trial, not all supporting researchers are mentioned by  
6  
7  
8 518 name in the protocol article. In addition, we acknowledge all supporting surgeons,  
9  
10 519 radiologists, emergency medicine physicians, nurses and technical staff in the laboratory.

11  
12  
13 520

14  
15 521 **REFERENCES**

16 522

17 523

18

19

20 524 1 Addiss DG, Shaffer N, Fowler BS, et al. The epidemiology of appendicitis and appendectomy  
21 525 in the United States, *Am J Epidemiol* 1990;132:910-25.

22

23 526

24 527

25 528

26

27

28 529 2 Ferris M, Quan S, Kaplan B, et al. The Global Incidence of Appendicitis: A Systematic Review  
29 530 of Population-based Studies, *Annals of Surgery* 2017;266:237-41  
30 531 doi:10.1097/SLA.0000000000002188.

31

32 532

33 533

34

35

36 534

37 535

38

39

40 536

41 537

42 538

43

44 539

45 540

46 541

47

48

49 542

50 543

51

52 544

53 545

54 546

55

56

57 547

58 548

59 549

60

10 Chen CY, Chen YC, Pu HN, et al. Bacteriology of acute appendicitis and its implication for  
the use of prophylactic antibiotics, *Surg Infect (Larchmt)* 2012;13:383-90  
doi:10.1089/sur.2011.135 [doi].

1

2

3 550 11 Reinisch A, Malkomes P, Habbe N, et al. Bad bacteria in acute appendicitis: rare but  
4 551 relevant, *Int J Colorectal Dis* 2017;32:1303-11 doi:10.1007/s00384-017-2862-0 [doi].

6 552 12 Guinane CM, Tadrous A, Fouhy F, et al. Microbial composition of human appendices from  
8 553 patients following appendectomy, *MBio* 2013;4:12.

10 554 13 Peeters T, Penders J, Smeekens SP, et al. The fecal and mucosal microbiome in acute  
11 555 appendicitis patients: an observational study, *Future Microbiol* 2019;14:111-27  
12 556 doi:10.2217/fmb-2018-0203 [doi].

14 557 14 Bennion RS, Baron EJ, Thompson JE, Jr, et al. The bacteriology of gangrenous and  
16 558 perforated appendicitis--revisited, *Ann Surg* 1990;211:165-71 doi:10.1097/00000658-  
17 559 199002000-00008 [doi].

19 560 15 Rivera-Chavez FA, Peters-Hybki DL, Barber RC, et al. Innate immunity genes influence the  
21 561 severity of acute appendicitis, *Ann Surg* 2004;240:269-77 doi:00000658-200408000-00012  
22 562 [pii].

24 563 16 Reinisch A, Malkomes P, Habbe N, et al. Bad bacteria in acute appendicitis: rare but  
25 564 relevant, *Int J Colorectal Dis* 2017;32:1303-11 doi:10.1007/s00384-017-2862-0.

27 565 17 Martirosian G, Bulanda M, Wojcik-Stojek B, et al. Acute appendicitis: the role of  
29 566 enterotoxigenic strains of *Bacteroides fragilis* and *Clostridium difficile*, *Med Sci Monit*  
30 567 2001;7:382-6.

32 568 18 Dethlefsen L, Relman DA. Incomplete recovery and individualized responses of the human  
33 569 distal gut microbiota to repeated antibiotic perturbation, *Proc Natl Acad Sci U S A* 2011;108  
35 570 Suppl 1:4554-61 doi:10.1073/pnas.1000087107 [doi].

37 571 19 Jernberg C, Lofmark S, Edlund C, et al. Long-term ecological impacts of antibiotic  
38 572 administration on the human intestinal microbiota, *ISME J* 2007;1:56-66 doi:ismej20073 [pii].

40 573 20 Manichanh C, Rigottier-Gois L, Bonnaud E, et al. Reduced diversity of faecal microbiota in  
42 574 Crohn's disease revealed by a metagenomic approach, *Gut* 2006;55:205-11  
43 575 doi:gut.2005.073817 [pii].

45 576 21 Qin J, Li Y, Cai Z, et al. A metagenome-wide association study of gut microbiota in type 2  
46 577 diabetes, *Nature* 2012;490:55-60 doi:10.1038/nature11450 [doi].

48 578 22 Lindgren M, Lofmark S, Edlund C, et al. Prolonged impact of a one-week course of  
50 579 clindamycin on *Enterococcus* spp. in human normal microbiota, *Scand J Infect Dis*  
51 580 2009;41:215-9 doi:10.1080/00365540802651897 [doi].

53 581 23 Raymond F, Ouameur AA, Deraspe M, et al. The initial state of the human gut microbiome  
54 582 determines its reshaping by antibiotics, *ISME J* 2016;10:707-20 doi:10.1038/ismej.2015.148  
56 583 [doi].

57

58

59

60

- 1  
2  
3 584 24 Jakobsson HE, Jernberg C, Andersson AF, et al. Short-term antibiotic treatment has  
4 585 differing long-term impacts on the human throat and gut microbiome, *PLoS One* 2010;5:e9836  
5 586 doi:10.1371/journal.pone.0009836 [doi].  
7  
8 587 25 Buelow E, Bello Gonzalez, T D J, Fuentes S, et al. Comparative gut microbiota and resistome  
9 588 profiling of intensive care patients receiving selective digestive tract decontamination and  
10 589 healthy subjects, *Microbiome* 2017;5:z doi:10.1186/s40168-017-0309-z [doi].  
11  
12  
13 590 26 Card RM, Mafura M, Hunt T, et al. Impact of Ciprofloxacin and Clindamycin Administration  
14 591 on Gram-Negative Bacteria Isolated from Healthy Volunteers and Characterization of the  
15 592 Resistance Genes They Harbor, *Antimicrob Agents Chemother* 2015;59:4410-6  
16 593 doi:10.1128/AAC.00068-15 [doi].  
17  
18  
19 594 27 Salminen P, Paajanen H, Rautio T, et al. Antibiotic Therapy vs Appendectomy for Treatment  
20 595 of Uncomplicated Acute Appendicitis: The APPAC Randomized Clinical Trial, *JAMA*  
21 596 2015;313:2340-8.  
22  
23 597 28 Salminen P, Tuominen R, Paajanen H, et al. Five-Year Follow-up of Antibiotic Therapy for  
24 598 Uncomplicated Acute Appendicitis in the APPAC Randomized Clinical Trial, *JAMA*  
25 599 2018;320:1259-65 doi:10.1001/jama.2018.13201 [doi].  
26  
27  
28 600 29 Sakran JV, Mylonas KS, Gryparis A, et al. Operation versus antibiotics--The "appendicitis  
29 601 conundrum" continues: A meta-analysis, *J Trauma Acute Care Surg* 2017;82:1129-37  
30 602 doi:10.1097/TA.0000000000001450 [doi].  
31  
32  
33 603 30 Sallinen V, Akl EA, You JJ, et al. Meta-analysis of antibiotics versus appendectomy for non-  
34 604 perforated acute appendicitis, *Br J Surg* 2016;103:656-67 doi:10.1002/bjs.10147 [doi].  
35  
36 605 31 Podda M, Gerardi C, Cillara N, et al. Antibiotic Treatment and Appendectomy for  
37 606 Uncomplicated Acute Appendicitis in Adults and Children: A Systematic Review and Meta-  
38 607 analysis, *Ann Surg* 2019 doi:10.1097/SLA.0000000000003225 [doi].  
39  
40  
41 608 32 Harnoss JC, Probst P, Büchler MW, et al. Antibiotics Versus Appendectomy for the  
42 609 Treatment of Uncomplicated Acute Appendicitis: An Updated Meta-Analysis of Randomised  
43 610 Controlled Trials by Rollins et al, *World J Surg* 2017;41:2411 doi:10.1007/s00268-016-3864-  
44 611 8.  
45  
46  
47 612 33 Rollins KE, Varadhan KK, Neal KR, et al. Antibiotics Versus Appendectomy for the  
48 613 Treatment of Uncomplicated Acute Appendicitis: An Updated Meta-Analysis of Randomised  
49 614 Controlled Trials, *World J Surg* 2016;40:2305-18 doi:10.1007/s00268-016-3561-7 [doi].  
50  
51 615 34 Chan A, Tetzlaff JM, Altman DG, et al. SPIRIT 2013 statement: defining standard protocol  
52 616 items for clinical trials, *Ann Intern Med* 2013;158:200-7 doi:10.7326/0003-4819-158-3-  
53 617 201302050-00583.  
54  
55  
56 618 35 Haijanen J, Sippola S, Gronroos J, et al. Optimising the antibiotic treatment of  
57 619 uncomplicated acute appendicitis: a protocol for a multicentre randomised clinical trial  
58 620 (APPAC II trial), *BMC Surg* 2018;18:y doi:10.1186/s12893-018-0451-y [doi].  
59  
60

1

2

3 621 36 Sippola S, Gronroos J, Sallinen V, et al. A randomised placebo-controlled double-blind  
 4 622 multicentre trial comparing antibiotic therapy with placebo in the treatment of  
 5 623 uncomplicated acute appendicitis: APPAC III trial study protocol, *BMJ Open* 2018;8:023623  
 7 624 doi:10.1136/bmjopen-2018-023623 [doi].

8

9 625 37 Lewis SJ, Heaton KW. Stool form scale as a useful guide to intestinal transit time, *Scand J*  
 10 626 *Gastroenterol* 1997;32:920-4 doi:10.3109/00365529709011203 [doi].

11

12 627 38 Vons C, Barry C, Maitre S, et al. Amoxicillin plus clavulanic acid versus appendicectomy for  
 13 628 treatment of acute uncomplicated appendicitis: an open-label, non-inferiority, randomised  
 15 629 controlled trial, *Lancet* 2011;377:1573-9 doi:10.1016/S0140-6736(11)60410-8.

16

17 630 39 Sippola S, Grönroos J, Tuominen R, et al. Economic evaluation of antibiotic therapy versus  
 18 631 appendicectomy for the treatment of uncomplicated acute appendicitis from the APPAC  
 19 632 randomized clinical trial, *British Journal of Surgery* 2017;104:1355-61 doi:10.1002/bjs.10575.

21

22 633

## 23 634 **Abbreviations**

24

25 635 **AMR:** Antimicrobial resistance

26

27 636 **CRP:** C-reactive protein

29

30 637 **CT:** Computed tomography

31

32 638 **GM:** Gut microbiota

33

34 639 **i.v.:** Intravenous

36

37 640 **MALDI-TOF:** Matrix Assisted Laser Desorption/Ionisation time-of-flight mass spectrometry

38

39 641 **MS:** Mass spectrometry

40

41 642 **NGS:** Next generation sequencing

43

44 643 **p.o.:** Per os

45

46 644 **SPIRIT:** Standard Protocol Items: recommendations for Interventional Trials

47

48 645 **VAP-1:** Vascular adhesion protein-1

50

51 646 **VAS:** Visual analogue scale

52

53 647

55

56 648

## 57 649 **FIGURE LEGENDS**

58

59 651 Figure 1. The synergy between MAPPAC, APPAC II and APPAC III studies.

60

1  
2  
3  
4  
5  
6  
7  
8  
9  
10  
11  
12  
13  
14  
15  
16  
17  
18  
19  
20  
21  
22  
23  
24  
25  
26  
27  
28  
29  
30  
31  
32  
33  
34  
35  
36  
37  
38  
39  
40  
41  
42  
43  
44  
45  
46  
47  
48  
49  
50  
51  
52  
53  
54  
55  
56  
57  
58  
59  
60

652 Figure 2. Flow chart of the study protocol

653  
654

For peer review only

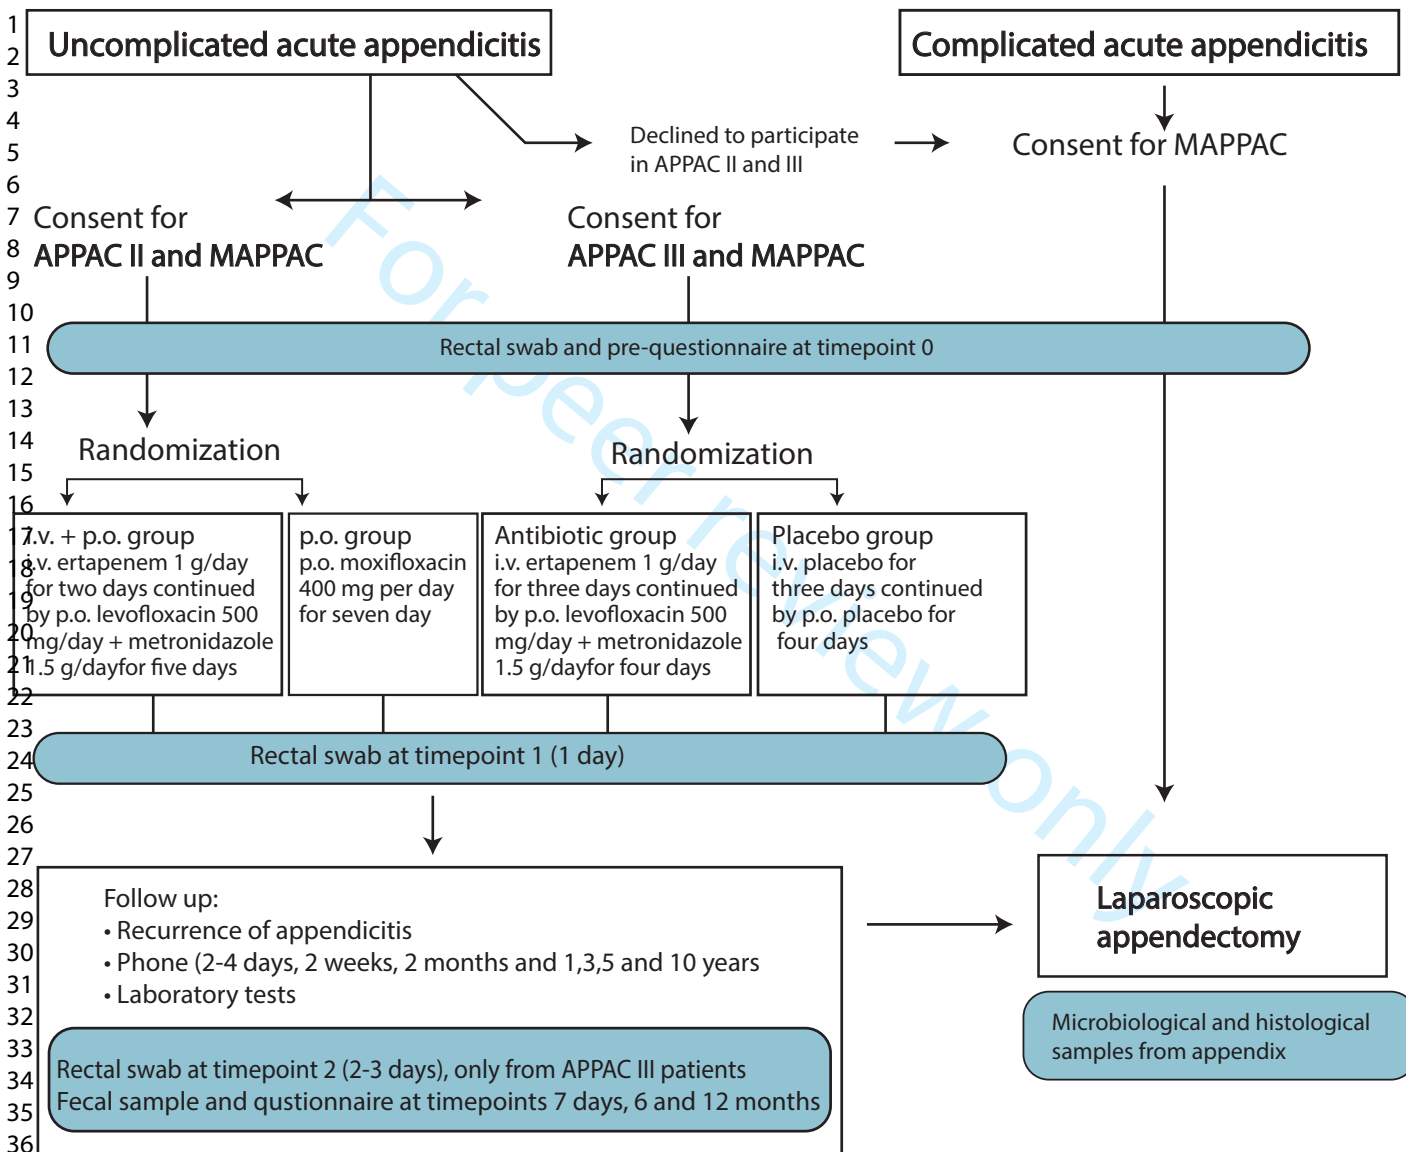

1  
2  
3  
4  
5  
6  
7  
8  
9  
10  
11  
12  
13  
14  
15  
16  
17  
18  
19  
20  
21  
22  
23  
24  
25  
26  
27  
28  
29  
30  
31  
32  
33  
34  
35  
36  
37  
38  
39  
40  
41  
42  
43  
44  
45  
46  
47  
48  
49  
50  
51  
52  
53  
54  
55  
56  
57  
58  
59  
60

Clinical suspicion of acute appendicitis

CT imaging

Uncomplicated acute appendicitis

Complicated acute appendicitis

refusing to participate in the APPAC II or III trials

APPAC II patient enrollment

APPAC III patient enrollment

Laparoscopic appendectomy

MAPPAC at Turku University Hospital

During hospital pharmacy office hours  
MAPPAC at all APPACIII study hospitals

- complicated appendicitis
  - uncomplicated appendicitis
  - recurrent appendicitis
- MAPPAC enrollment at Turku University Hospital

Randomization

Randomization

i.v. + p.o.

p.o.

antibiotics

placebo

treatment failure or recurrent appendicitis

Microbiological and immunological samples and questionnaire

## SUPPLEMENTARY FILE

### Laboratory methods

#### DNA extraction and analysis

##### Stool samples and rectal and appendiceal swabs

Bacterial DNA from rectal and appendiceal swabs and faecal samples are extracted with semiautomated DNA extraction kit together with NorDiag Arrow extraction instrument (Diasorin). The following sample preparation is undertaken before the extraction: 500 µl of the sample is added to 700 µl of stool stabilizer in a 1.4 mm Ceramic Powerbead Tube (Qiagen, Hilden, Germany) and homogenized with MO BIO PowerLyzer 24 Bench Top Bead-Based Homogenizer (MO BIO Laboratories, Inc., USA) at 1000 rpm for 3 minutes followed by centrifugation at 5000 x g for 5 minutes and 600 µl of the supernatant is transferred into a new tube, the centrifugation is repeated and 500 µl of the supernatant is transferred into a new tube. This pretreatment is followed by the DNA extraction, which is performed according to the manufacturer's instructions.

**Appendiceal biopsy:** Microbiological DNA is extracted from appendix biopsy stored in RNAlater with semiautomated DNA extraction kit using NorDiag Arrow extraction instrument. At first RNA later is removed by centrifugation and the pellet is resuspended into ultrapure water. Subsequently, the resuspension containing also the biopsy is treated with proteinase K in thermomixer. From the resulting solution DNA extraction is carried out according to manufacturer's instructions.

The concentration of eluted DNA from all sample types is measured with Qubit dsDNA HS or BR assay kit (Thermo Fisher Scientific) using Qubit fluorometer (Life Technologies, Carlsbad, California, USA). DNA is divided into two aliquots and stored at -75°C for later analysis. Microbial



1  
2  
3 profile of samples will be analysed with NGS approach using appropriate methods and Illumina  
4  
5 Miseq system.  
6  
7  
8  
9

### 10 **Analyses of metagenome, transcriptome and proteome from appendiceal biopsy**

11  
12 Total RNA and proteins from the appendiceal biopsy are extracted with appropriate methods.  
13  
14 Transcriptome and metagenome are analysed with Illumina Hiseq system. In addition, the  
15  
16 expression of specific genes is quantified with quantitative real-time PCR. Proteome is  
17  
18 characterized using mass spectrometry-based methods with qualitative and quantitative  
19  
20 approach.  
21  
22  
23  
24  
25

### 26 **Culture methods**

27  
28 Appendiceal swabs are cultured with both aerobic and anaerobic culture methods. For aerobic  
29  
30 culture the following growth media are used: CHROMagar Orientation (Becton Dickinson,  
31  
32 Franklin Lakes, New Jersey, USA), Trypticase soy agar with 5% sheep blood (Becton Dickinson),  
33  
34 Yersinia selective agar and Streptococcus selective agar (in house production). If the  
35  
36 appendectomy is performed during the office hours, an additional anaerobic culture is made in  
37  
38 connection with the sample collection. Samples for anaerobic culturing are collected with a sterile  
39  
40 cotton swab from the appendix and cultured for fastidious anaerobe agar with blood (FAA) and  
41  
42 kanamycin-vancomycin laked blood agar (KVLB) (both in house production), which are  
43  
44 immediately transferred into anaerobic jar with anaerobic gas generating sachet (Anaerogen 3,5  
45  
46 l, Thermo Fisher Scientific).  
47  
48  
49  
50  
51  
52  
53  
54  
55  
56  
57  
58  
59  
60

1  
2  
3 Cultures are incubated at +35 °C for 18-24 hours. Morphologically distinct colonies are  
4  
5 subcultured until a pure culture is obtained. Isolated species are frozen in a mixture of skim milk  
6  
7 and glycerol at -75 °C.  
8  
9

### 12 **MALDI-TOF mass spectrometry**

14  
15 The identification of isolated bacteria is done with Bruker matrix-assisted laser  
16  
17 desorption/ionisation time-of-flight mass spectrometry (MALDI-TOF MS). Isolates are inoculated  
18  
19 and cultured for 18-48 hours at +35 °C before the analysis. For the analysis, colony is applied  
20  
21 either directly or through ethanol/formic acid extraction on a steel plate and HCCA matrix ( $\alpha$ -  
22  
23 cyano-4-hydroxycinnamic acid in 50% acetonitrile-2.5% trifluoroacetic acid (Bruker Daltonics,  
24  
25 Bremen, Germany)) is added according to the manufacturer's instructions. The identification is  
26  
27 done using Microflex LT instrument and MALDI Biotyper software (Bruker Daltonics). If isolates  
28  
29 cannot be identified due to the absence of reference peaks in the database, the isolate is identified  
30  
31 with sequencing the 16S rRNA gene.  
32  
33  
34  
35  
36  
37

### 38 **Antimicrobial susceptibility testing**

39  
40 Phenotypic antimicrobial susceptibility testing for the isolated aerobic and anaerobic bacteria is  
41  
42 performed by disk diffusion and MIC methods, according to the European Committee on  
43  
44 Antimicrobial Susceptibility Testing (EUCAST) guidelines. For certain bacteria, the Clinical and  
45  
46 Laboratory Standards Institute (CLSI) guidelines can be used.  
47  
48

49  
50 Further molecular analysis for antimicrobial resistance or virulence genes using e.g., PCR, Sanger  
51  
52 sequencing and whole genome sequencing (WGS) are also performed for selected isolates.  
53  
54

### 55 **Appendicolith analysis**

1  
2  
3 Appendicoliths are assessed both on the surface and cross-sectional morphology. Based on the  
4 morphological characteristics and a degree of hardness, all appendicoliths will be classified. The  
5  
6 morphological characteristics and a degree of hardness, all appendicoliths will be classified. The  
7  
8 composition of selected appendicoliths are analysed with physical and chemical methods.  
9

## 10 11 12 **Immunological analysis**

13  
14  
15 The appendiceal biopsies are analysed immunohistochemically by determining the presence of  
16  
17 different cell types and blood vessel surface markers. Neutrophils, leukocytes and monocytes will  
18  
19 be analysed and special interest will be focused on lymphocyte subtypes (i.e., CD4/CD8 and more  
20  
21 detailed subgroup analyses such as regulatory T cells) and monocyte markers (i.e., macrophage  
22  
23 M1/M2 / receptor MHCII). Moreover, certain inflammation induced markers on endothelium such  
24  
25 as VAP-1, E-selectin and P-selectin will be evaluated. In order to compare possible differences  
26  
27 between patients with successful antibiotic therapy to patients with failed antibiotic therapy or  
28  
29 complicated acute appendicitis the serum samples will be screened to identify possible inflammatory  
30  
31 or immunological markers for identifying the different forms of the disease. Cytokines, chemokines  
32  
33 and growth factors will be tested using Bio-Plex Pro Human Cytokine 48-Plex Screening Panel (BIO-  
34  
35 RAD) containing the following analytes: Basic FGF, CTACK, eotaxin, G-CSF, GM-CSF, GRO-a, HGF,  
36  
37 ICAM-1, IFN-a2, IFN-g, IL-1a, IL-1b, IL-1ra, IL-2, IL-2Ra, IL-3, IL-4, IL-5, IL-6, IL-7, IL-8, IL-9, IL-10, IL-  
38  
39 12 (p40), IL-12 (p70), IL-13, IL-15, IL-16, IL-17A, IL-18, IP-10, LIF, MCP-1 (MCAF), MCP-3, M-CSF, MIF,  
40  
41 MIG, MIP-1a, MIP-1b, b-NGF, PDGF-BB, RANTES, SCF, SCGF-b, SDF-1a, TNF-a, TNF-b, TRAIL, VCAM-1  
42  
43 and VEGF-A. Moreover, we will use in house analyses to measure soluble VAP-1 (inflammatory) and  
44  
45 CD73 (anti-inflammatory). In addition, metabolomics approach using nuclear magnetic resonance  
46  
47 (NMR) spectroscopy and liquid chromatography-mass spectrometry (LC-MS) metabolomics  
48  
49 platforms will be used for biomarker analysis. The results obtained from immunological analyses will  
50  
51 be correlated to the clinical parameters and to the microbiological findings.  
52  
53  
54  
55  
56  
57  
58  
59  
60



STANDARD PROTOCOL ITEMS: RECOMMENDATIONS FOR INTERVENTIONAL TRIALS

SPIRIT 2013 Checklist: Recommended items to address in a clinical trial protocol and related documents\*

| Section/item                      | Item No | Description                                                                                                                                                                                                                                                                              | Page Number on which item is reported |
|-----------------------------------|---------|------------------------------------------------------------------------------------------------------------------------------------------------------------------------------------------------------------------------------------------------------------------------------------------|---------------------------------------|
| <b>Administrative information</b> |         |                                                                                                                                                                                                                                                                                          |                                       |
| Title                             | 1       | Descriptive title identifying the study design, population, interventions, and, if applicable, trial acronym                                                                                                                                                                             | 1                                     |
| Trial registration                | 2a      | Trial identifier and registry name. If not yet registered, name of intended registry                                                                                                                                                                                                     | 3                                     |
|                                   | 2b      | All items from the World Health Organization Trial Registration Data Set                                                                                                                                                                                                                 | n/a                                   |
| Protocol version                  | 3       | Date and version identifier                                                                                                                                                                                                                                                              | n/a                                   |
| Funding                           | 4       | Sources and types of financial, material, and other support                                                                                                                                                                                                                              | 22                                    |
| Roles and responsibilities        | 5a      | Names, affiliations, and roles of protocol contributors                                                                                                                                                                                                                                  | 1,22                                  |
|                                   | 5b      | Name and contact information for the trial sponsor                                                                                                                                                                                                                                       | 1                                     |
|                                   | 5c      | Role of study sponsor and funders, if any, in study design; collection, management, analysis, and interpretation of data; writing of the report; and the decision to submit the report for publication, including whether they will have ultimate authority over any of these activities | 22                                    |
|                                   | 5d      | Composition, roles, and responsibilities of the coordinating centre, steering committee, endpoint adjudication committee, data management team, and other individuals or groups overseeing the trial, if applicable (see Item 21a for data monitoring committee)                         | 7-8                                   |
| <b>Introduction</b>               |         |                                                                                                                                                                                                                                                                                          |                                       |

|                                                           |     |                                                                                                                                                                                                                                                                                                                                                                                |           |
|-----------------------------------------------------------|-----|--------------------------------------------------------------------------------------------------------------------------------------------------------------------------------------------------------------------------------------------------------------------------------------------------------------------------------------------------------------------------------|-----------|
| Background and rationale                                  | 6a  | Description of research question and justification for undertaking the trial, including summary of relevant studies (published and unpublished) examining benefits and harms for each intervention                                                                                                                                                                             | 5-7       |
|                                                           | 6b  | Explanation for choice of comparators                                                                                                                                                                                                                                                                                                                                          | 6-7       |
| Objectives                                                | 7   | Specific objectives or hypotheses                                                                                                                                                                                                                                                                                                                                              | 7         |
| Trial design                                              | 8   | Description of trial design including type of trial (eg, parallel group, crossover, factorial, single group), allocation ratio, and framework (eg, superiority, equivalence, noninferiority, exploratory)                                                                                                                                                                      | 7         |
| <b>Methods: Participants, interventions, and outcomes</b> |     |                                                                                                                                                                                                                                                                                                                                                                                |           |
| Study setting                                             | 9   | Description of study settings (eg, community clinic, academic hospital) and list of countries where data will be collected. Reference to where list of study sites can be obtained                                                                                                                                                                                             | 8         |
| Eligibility criteria                                      | 10  | Inclusion and exclusion criteria for participants. If applicable, eligibility criteria for study centres and individuals who will perform the interventions (eg, surgeons, psychotherapists)                                                                                                                                                                                   | 9-11      |
| Interventions                                             | 11a | Interventions for each group with sufficient detail to allow replication, including how and when they will be administered                                                                                                                                                                                                                                                     | 11-12     |
|                                                           | 11b | Criteria for discontinuing or modifying allocated interventions for a given trial participant (eg, drug dose change in response to harms, participant request, or improving/worsening disease)                                                                                                                                                                                 | 14        |
|                                                           | 11c | Strategies to improve adherence to intervention protocols, and any procedures for monitoring adherence (eg, drug tablet return, laboratory tests)                                                                                                                                                                                                                              | 14-15, 17 |
|                                                           | 11d | Relevant concomitant care and interventions that are permitted or prohibited during the trial                                                                                                                                                                                                                                                                                  | n/a       |
| Outcomes                                                  | 12  | Primary, secondary, and other outcomes, including the specific measurement variable (eg, systolic blood pressure), analysis metric (eg, change from baseline, final value, time to event), method of aggregation (eg, median, proportion), and time point for each outcome. Explanation of the clinical relevance of chosen efficacy and harm outcomes is strongly recommended | 15-16     |

|                                                                     |     |                                                                                                                                                                                                                                                                                                                                                          |                 |
|---------------------------------------------------------------------|-----|----------------------------------------------------------------------------------------------------------------------------------------------------------------------------------------------------------------------------------------------------------------------------------------------------------------------------------------------------------|-----------------|
| Participant timeline                                                | 13  | Time schedule of enrolment, interventions (including any run-ins and washouts), assessments, and visits for participants. A schematic diagram is highly recommended (see Figure)                                                                                                                                                                         | 12-15, figure 2 |
| Sample size                                                         | 14  | Estimated number of participants needed to achieve study objectives and how it was determined, including clinical and statistical assumptions supporting any sample size calculations                                                                                                                                                                    | 16, n/a         |
| Recruitment                                                         | 15  | Strategies for achieving adequate participant enrolment to reach target sample size                                                                                                                                                                                                                                                                      | 11, 17          |
| <b>Methods: Assignment of interventions (for controlled trials)</b> |     |                                                                                                                                                                                                                                                                                                                                                          |                 |
| Allocation:                                                         |     |                                                                                                                                                                                                                                                                                                                                                          | n/a             |
| Sequence generation                                                 | 16a | Method of generating the allocation sequence (eg, computer-generated random numbers), and list of any factors for stratification. To reduce predictability of a random sequence, details of any planned restriction (eg, blocking) should be provided in a separate document that is unavailable to those who enrol participants or assign interventions | n/a             |
| Allocation concealment mechanism                                    | 16b | Mechanism of implementing the allocation sequence (eg, central telephone; sequentially numbered, opaque, sealed envelopes), describing any steps to conceal the sequence until interventions are assigned                                                                                                                                                | n/a             |
| Implementation                                                      | 16c | Who will generate the allocation sequence, who will enrol participants, and who will assign participants to interventions                                                                                                                                                                                                                                | n/a             |
| Blinding (masking)                                                  | 17a | Who will be blinded after assignment to interventions (eg, trial participants, care providers, outcome assessors, data analysts), and how                                                                                                                                                                                                                | n/a             |
|                                                                     | 17b | If blinded, circumstances under which unblinding is permissible, and procedure for revealing a participant's allocated intervention during the trial                                                                                                                                                                                                     | n/a             |
| <b>Methods: Data collection, management, and analysis</b>           |     |                                                                                                                                                                                                                                                                                                                                                          |                 |

|                                                          |                            |     |                                                                                                                                                                                                                                                                                                                                                                                                              |                               |
|----------------------------------------------------------|----------------------------|-----|--------------------------------------------------------------------------------------------------------------------------------------------------------------------------------------------------------------------------------------------------------------------------------------------------------------------------------------------------------------------------------------------------------------|-------------------------------|
| 1<br>2<br>3<br>4<br>5<br>6<br>7<br>8<br>9<br>10<br>11    | Data collection methods    | 18a | Plans for assessment and collection of outcome, baseline, and other trial data, including any related processes to promote data quality (eg, duplicate measurements, training of assessors) and a description of study instruments (eg, questionnaires, laboratory tests) along with their reliability and validity, if known. Reference to where data collection forms can be found, if not in the protocol | 12-17, supplementary material |
| 12<br>13<br>14<br>15<br>16<br>17                         |                            | 18b | Plans to promote participant retention and complete follow-up, including list of any outcome data to be collected for participants who discontinue or deviate from intervention protocols                                                                                                                                                                                                                    | 17                            |
| 18<br>19<br>20<br>21<br>22<br>23<br>24<br>25             | Data management            | 19  | Plans for data entry, coding, security, and storage, including any related processes to promote data quality (eg, double data entry; range checks for data values). Reference to where details of data management procedures can be found, if not in the protocol                                                                                                                                            | 18                            |
| 26<br>27<br>28<br>29<br>30<br>31                         | Statistical methods        | 20a | Statistical methods for analysing primary and secondary outcomes. Reference to where other details of the statistical analysis plan can be found, if not in the protocol                                                                                                                                                                                                                                     | 16                            |
| 32<br>33<br>34                                           |                            | 20b | Methods for any additional analyses (eg, subgroup and adjusted analyses)                                                                                                                                                                                                                                                                                                                                     | 17                            |
| 35<br>36<br>37<br>38<br>39<br>40                         |                            | 20c | Definition of analysis population relating to protocol non-adherence (eg, as randomised analysis), and any statistical methods to handle missing data (eg, multiple imputation)                                                                                                                                                                                                                              | n/a                           |
| 41<br>42                                                 | <b>Methods: Monitoring</b> |     |                                                                                                                                                                                                                                                                                                                                                                                                              |                               |
| 43<br>44<br>45<br>46<br>47<br>48<br>49<br>50<br>51<br>52 | Data monitoring            | 21a | Composition of data monitoring committee (DMC); summary of its role and reporting structure; statement of whether it is independent from the sponsor and competing interests; and reference to where further details about its charter can be found, if not in the protocol. Alternatively, an explanation of why a DMC is not needed                                                                        | 22                            |
| 53<br>54<br>55<br>56<br>57<br>58<br>59<br>60             |                            | 21b | Description of any interim analyses and stopping guidelines, including who will have access to these interim results and make the final decision to terminate the trial                                                                                                                                                                                                                                      | n/a                           |

|                                 |     |                                                                                                                                                                                                                                                                                     |        |
|---------------------------------|-----|-------------------------------------------------------------------------------------------------------------------------------------------------------------------------------------------------------------------------------------------------------------------------------------|--------|
| Harms                           | 22  | Plans for collecting, assessing, reporting, and managing solicited and spontaneously reported adverse events and other unintended effects of trial interventions or trial conduct                                                                                                   | 17, 18 |
| Auditing                        | 23  | Frequency and procedures for auditing trial conduct, if any, and whether the process will be independent from investigators and the sponsor                                                                                                                                         | n/a    |
| <b>Ethics and dissemination</b> |     |                                                                                                                                                                                                                                                                                     |        |
| Research ethics approval        | 24  | Plans for seeking research ethics committee/institutional review board (REC/IRB) approval                                                                                                                                                                                           | 18     |
| Protocol amendments             | 25  | Plans for communicating important protocol modifications (eg, changes to eligibility criteria, outcomes, analyses) to relevant parties (eg, investigators, REC/IRBs, trial participants, trial registries, journals, regulators)                                                    | n/a    |
| Consent or assent               | 26a | Who will obtain informed consent or assent from potential trial participants or authorised surrogates, and how (see Item 32)                                                                                                                                                        | 8-9    |
|                                 | 26b | Additional consent provisions for collection and use of participant data and biological specimens in ancillary studies, if applicable                                                                                                                                               | 9, 18  |
| Confidentiality                 | 27  | How personal information about potential and enrolled participants will be collected, shared, and maintained in order to protect confidentiality before, during, and after the trial                                                                                                | 18     |
| Declaration of interests        | 28  | Financial and other competing interests for principal investigators for the overall trial and each study site                                                                                                                                                                       | 22     |
| Access to data                  | 29  | Statement of who will have access to the final trial dataset, and disclosure of contractual agreements that limit such access for investigators                                                                                                                                     | 18     |
| Ancillary and post-trial care   | 30  | Provisions, if any, for ancillary and post-trial care, and for compensation to those who suffer harm from trial participation                                                                                                                                                       | n/a    |
| Dissemination policy            | 31a | Plans for investigators and sponsor to communicate trial results to participants, healthcare professionals, the public, and other relevant groups (eg, via publication, reporting in results databases, or other data sharing arrangements), including any publication restrictions | 18     |



|                            |     |                                                                                                                                                                                                |                               |
|----------------------------|-----|------------------------------------------------------------------------------------------------------------------------------------------------------------------------------------------------|-------------------------------|
|                            | 31b | Authorship eligibility guidelines and any intended use of professional writers                                                                                                                 | n/a                           |
|                            | 31c | Plans, if any, for granting public access to the full protocol, participant-level dataset, and statistical code                                                                                | n/a                           |
| <b>Appendices</b>          |     |                                                                                                                                                                                                |                               |
| Informed consent materials | 32  | Model consent form and other related documentation given to participants and authorised surrogates                                                                                             | in finnish only               |
| Biological specimens       | 33  | Plans for collection, laboratory evaluation, and storage of biological specimens for genetic or molecular analysis in the current trial and for future use in ancillary studies, if applicable | 12-15, supplementary material |

\*It is strongly recommended that this checklist be read in conjunction with the SPIRIT 2013 Explanation & Elaboration for important clarification on the items. Amendments to the protocol should be tracked and dated. The SPIRIT checklist is copyrighted by the SPIRIT Group under the Creative Commons "[Attribution-NonCommercial-NoDerivs 3.0 Unported](https://creativecommons.org/licenses/by-nc-nd/3.0/)" license.

# BMJ Open

## A Prospective Multicenter Cohort Trial on Acute Appendicitis and Microbiota – Etiology and Effects of Antimicrobial Treatment: Study protocol for the MAPPAC (Microbiology Appendicitis Acuta) Trial

|                                 |                                                                                                                                                                                                                                                                                                                                                                                                                                                                                                                                                                                                                                                                                                                                                                                                                                                                                                                                                                                                                                                                                                                                                                                                                                                                                                                                                       |
|---------------------------------|-------------------------------------------------------------------------------------------------------------------------------------------------------------------------------------------------------------------------------------------------------------------------------------------------------------------------------------------------------------------------------------------------------------------------------------------------------------------------------------------------------------------------------------------------------------------------------------------------------------------------------------------------------------------------------------------------------------------------------------------------------------------------------------------------------------------------------------------------------------------------------------------------------------------------------------------------------------------------------------------------------------------------------------------------------------------------------------------------------------------------------------------------------------------------------------------------------------------------------------------------------------------------------------------------------------------------------------------------------|
| Journal:                        | <i>BMJ Open</i>                                                                                                                                                                                                                                                                                                                                                                                                                                                                                                                                                                                                                                                                                                                                                                                                                                                                                                                                                                                                                                                                                                                                                                                                                                                                                                                                       |
| Manuscript ID                   | bmjopen-2019-031137.R2                                                                                                                                                                                                                                                                                                                                                                                                                                                                                                                                                                                                                                                                                                                                                                                                                                                                                                                                                                                                                                                                                                                                                                                                                                                                                                                                |
| Article Type:                   | Protocol                                                                                                                                                                                                                                                                                                                                                                                                                                                                                                                                                                                                                                                                                                                                                                                                                                                                                                                                                                                                                                                                                                                                                                                                                                                                                                                                              |
| Date Submitted by the Author:   | 19-Jul-2019                                                                                                                                                                                                                                                                                                                                                                                                                                                                                                                                                                                                                                                                                                                                                                                                                                                                                                                                                                                                                                                                                                                                                                                                                                                                                                                                           |
| Complete List of Authors:       | <p>Vanhatalo, Sanja; University of Turku, Institute of Biomedicine, Research Center for Cancer, Infections and Immunity; Turku University Hospital, Division of Digestive Surgery and Urology</p> <p>Munukka, Eveliina; University of Turku Faculty of Medicine; Turku University Hospital, Department of Clinical Microbiology</p> <p>Sippola, Suvi; Turku University Hospital, Division of Digestive Surgery and Urology; University of Turku, Department of Surgery</p> <p>Jalkanen, Sirpa; University of Turku, Medicity and Institute of Biomedicine</p> <p>Grönroos, Juha; Turku University Hospital, Division of Digestive Surgery and Urology; University of Turku, Department of Surgery</p> <p>Marttila, Harri; Turku University Hospital, Department of Hospital Hygiene and Infection Control</p> <p>Eerola, Erkki; University of Turku, Institute of Biomedicine, Research Center for Cancer, Infections and Immunity; Turku University Hospital, Department of Clinical Microbiology</p> <p>Hurme, Saija; University of Turku, Department of Biostatistics</p> <p>Hakanen, Antti; University of Turku, Institute of Biomedicine, Research Center for Cancer, Infections and Immunity; Turku University Hospital, Department of Clinical Microbiology</p> <p>Salminen, Paulina; Turun Yliopisto, Surgery; Turku University Hospital,</p> |
| <b>Primary Subject Heading</b>: | Gastroenterology and hepatology                                                                                                                                                                                                                                                                                                                                                                                                                                                                                                                                                                                                                                                                                                                                                                                                                                                                                                                                                                                                                                                                                                                                                                                                                                                                                                                       |
| Secondary Subject Heading:      | Infectious diseases                                                                                                                                                                                                                                                                                                                                                                                                                                                                                                                                                                                                                                                                                                                                                                                                                                                                                                                                                                                                                                                                                                                                                                                                                                                                                                                                   |
| Keywords:                       | appendicitis, appendectomy, appendicitis etiology, appendicolith, microbiota, antimicrobial resistance                                                                                                                                                                                                                                                                                                                                                                                                                                                                                                                                                                                                                                                                                                                                                                                                                                                                                                                                                                                                                                                                                                                                                                                                                                                |
|                                 |                                                                                                                                                                                                                                                                                                                                                                                                                                                                                                                                                                                                                                                                                                                                                                                                                                                                                                                                                                                                                                                                                                                                                                                                                                                                                                                                                       |

SCHOLARONE™  
Manuscripts

1  
2  
3  
4  
5  
6  
7  
8  
9  
10  
11  
12  
13  
14  
15  
16  
17  
18  
19  
20  
21  
22  
23  
24  
25  
26  
27  
28  
29  
30  
31  
32  
33  
34  
35  
36  
37  
38  
39  
40  
41  
42  
43  
44  
45  
46  
47  
48  
49  
50  
51  
52  
53  
54  
55  
56  
57  
58  
59  
60

1  
2  
3 1  
4  
5 2 **A Prospective Multicenter Cohort Trial on Acute Appendicitis and Microbiota – Etiology**  
6  
7  
8 3 **and Effects of Antimicrobial Treatment: Study protocol for the MAPPAC (Microbiology**  
9  
10 4 **Appendicitis Acuta) Trial**  
11

12 5  
13  
14 6  
15  
16  
17 7 Vanhatalo S., MSc <sup>1,2</sup>, Munukka E., PhD <sup>3,4</sup>, Sippola S., MD <sup>2,5</sup>, Jalkanen S., MD, PhD <sup>6</sup>, Grönroos J.,  
18  
19 8 MD, PhD <sup>2,5</sup>, Marttila H., MD, PhD <sup>7</sup>, Eerola E., MD, PhD <sup>1,4</sup>, Hurme S., MSc <sup>8</sup>, Hakanen A.J., MD,  
20  
21 9 PhD <sup>1,4</sup>, Salminen P., MD, PhD <sup>2,5,9</sup>  
22  
23

- 24 10 1. Research Center for Cancer, Infections and Immunity, Institute of Biomedicine, University  
25 11 of Turku, Finland  
26 12 2. Division of Digestive Surgery and Urology, Turku University Hospital, Turku, Finland  
27 13 3. Faculty of Medicine, University of Turku, Finland  
28 14 4. Department of Clinical Microbiology, Turku University Hospital, Finland  
29 15 5. Department of Surgery, University of Turku, Turku, Finland  
30 16 6. MediCity and Institute of Biomedicine, University of Turku  
31 17 7. Department of Hospital Hygiene and Infection Control, Turku University Hospital, Turku,  
32 18 Finland  
33 19 8. Department of Biostatistics, University of Turku, Turku, Finland  
34 20 9. Satasairaala Central Hospital, Pori, Finland  
35  
36  
37  
38  
39  
40  
41 23

42  
43 24 **Correspondence:**  
44

45 25 Paulina Salminen, MD, PhD  
46 26 Division of Digestive Surgery and Urology  
47 27 Turku University Hospital  
48 28 Kiinamylynkatu 4-8, 20520 Turku, Finland  
49 29 Tel. +358 2 313 0542, +358 40 718 1896  
50 30 Fax. +358 2 313 2284  
51 31 E-mail: [paulina.salminen@tyks.fi](mailto:paulina.salminen@tyks.fi)  
52 32  
53  
54

55  
56 33 **Word count: 4143**  
57  
58 34  
59  
60

**ABSTRACT**

**Introduction:** Based on epidemiological and clinical data acute appendicitis can present either as uncomplicated or complicated. The etiology of these different appendicitis forms remains unknown. Antibiotic therapy has been shown to be safe, efficient and cost-effective for computed tomography (CT) confirmed uncomplicated acute appendicitis. Despite appendicitis being one of the most common surgical emergencies, there are very few reports on appendicitis etiology and pathophysiology focusing on the differences between uncomplicated and complicated appendicitis. MAPPAC (Microbiology APPendicitis ACuta) trial aims to evaluate these microbiological and immunological aspects including immune response in the etiology of these different forms also assessing both antibiotics non-responders and appendicitis recurrence. In addition, MAPPAC aims to determine antibiotic and placebo effects on gut microbiota composition and antimicrobial resistance.

**Methods and analysis:** MAPPAC is a prospective clinical trial with both single- and multicentre arm conducted in close synergy with concurrent trials APPAC II (p.o. vs. i.v+p.o. antibiotics, NCT03236961) and APPAC III (double-blind trial placebo vs. antibiotics, NCT03234296) randomized clinical trials. Based on the enrolment for these trials, patients with CT-confirmed uncomplicated acute appendicitis are recruited also to the MAPPAC study. In addition to these conservatively treated randomized patients with uncomplicated acute appendicitis, MAPPAC will recruit patients with uncomplicated and complicated appendicitis undergoing appendectomy. Rectal and appendiceal swabs, appendicolith, faecal, and serum samples, appendiceal biopsies, and clinical data are collected during the hospital stay for microbiological and immunological analysis in both study arms with the longitudinal study arm collecting fecal samples also during follow-up up to 12 months after appendicitis treatment.

**Ethics and dissemination:** This study has been approved by the Ethics Committee of the Hospital District of Southwest Finland (Turku University Hospital, approval number

1  
2  
3 60 ATMK:142/1800/2016) and the Finnish Medicines Agency (Fimea). Results of the trial will be  
4  
5  
6 61 published in peer-reviewed journals.

7  
8 62 **Trial registration:** Eudra-CT: 2016-003655-29 (2017-01-12), [clinicaltrials.gov](http://clinicaltrials.gov) NCT03257423.  
9

10 63

11  
12 64

13 65 **KEYWORDS**

14  
15  
16 66 Appendicitis, appendectomy, appendicitis etiology, appendicolith, microbiota, antimicrobial  
17  
18 67 resistance  
19

20  
21 68

22  
23 69

24 70  
25  
26  
27  
28  
29  
30  
31  
32  
33  
34  
35  
36  
37  
38  
39  
40  
41  
42  
43  
44  
45  
46  
47  
48  
49  
50  
51  
52  
53  
54  
55  
56  
57  
58  
59  
60

For peer review only

## 71 **Strengths and limitations of this study**

- 72 - To our knowledge, MAPPAC (Microbiology APPendicitis ACuta) is the first prospective  
73 trial comparing the role of microbiology and immunology including immune response  
74 in the etiology of uncomplicated and complicated acute appendicitis in a large patient  
75 cohort consisting of CT-diagnosed patients also specifically evaluating appendicoliths  
76 and recurrent appendicitis after initial successful conservative treatment.
- 77 - The strong synergy between two ongoing randomized clinical trials (APPAC II and  
78 APPAC III) enabling a large prospective patient cohort of acute appendicitis patients  
79 with associated clinical data to be assessed with the microbiological and immunological  
80 findings.
- 81 - The application of next generation sequencing combined with traditional culturing  
82 methods will provide extensive information about the microbiological factors in the  
83 etiology of complicated and uncomplicated acute appendicitis also presenting a  
84 challenge in differentiating between etiologic and non-etiological microbiota in the  
85 specimens.
- 86 - The comprehensive approach of the MAPPAC study acquiring a large set of samples in  
87 the emergency surgery setting presents a challenge to surgeons on call and some  
88 patients may not have all study samples available.

## 96 INTRODUCTION

97 Acute appendicitis is one of the most common causes of abdominal pain in emergency  
98 departments. The lifetime risk of acute appendicitis in males is 8.6% and 6.7% in females [1]  
99 with recent meta-analysis showing an increasing trend in appendicitis incidence in the  
100 industrialised countries [2]. Based on epidemiological and clinical data, acute appendicitis can  
101 present either as uncomplicated or complicated with the majority of cases being  
102 uncomplicated.

103 The different epidemiological trends of uncomplicated and complicated acute appendicitis  
104 indicate different pathophysiology [3]. Despite the high incidence of acute appendicitis, there  
105 are very few reports on appendicitis etiology and pathophysiology especially focusing on the  
106 possible differences between uncomplicated and complicated acute appendicitis. Complicated  
107 acute appendicitis in this trial is defined as a finding of perforation, appendicolith, abscess or  
108 a suspicion of tumor. Appendicolith is a calcified faecal concretion in the appendix and it is the  
109 most common form of complicated acute appendicitis. Even though the first thorough study  
110 on appendicoliths was already reported in 1966 [4], information about appendiceal calculi is  
111 scarce. Obstruction of the appendiceal lumen caused by an appendicolith, lymphoid  
112 hyperplasia, or swelling has been evaluated to be the primary cause of appendicitis and  
113 bacterial overgrowth has been considered a consequence [5]. However, bacterial infection has  
114 also been proposed as the primary cause of appendicitis [6, 7]. *Bacteroides* species are  
115 reported to be one of most common bacterial findings in appendicitis [8, 9]. Further, certain  
116 members of the *Fusobacteria*, especially *F. nucleatum* and *F. necrophorum*, are present in most  
117 appendicitis samples [6]. The most common aerobic bacteria organism detected by culturing  
118 is *Escherichia coli*, but also *Klebsiella pneumoniae*, *Streptococcus spp.*, *Enterococcus spp.* and  
119 *Pseudomonas aeruginosa* have been reported [10, 11]. To our knowledge, only one study with  
120 a very small number of patients has characterised the adult appendiceal microbiota profile



1  
2  
3 121 with next generation sequencing (NGS) methods. Appendix seems to have diverse microbiota  
4  
5 122 including both commensal species from gut microbiota (GM) and opportunistic pathogens  
6  
7  
8 123 [12, 13]. Since the interindividual variability in the microbial composition of the appendix  
9  
10 124 samples is high [12], a larger number of appendicitis patients is needed to draw the  
11  
12 125 microbiological conclusions. Since most of the species identified from the appendix with both  
13  
14  
15 126 culturing and NGS methods can also be part of normal gut microbiota it is challenging to  
16  
17 127 determine their role in the infection [14]. In addition, the immune response and  
18  
19  
20 128 predisposition for infection by specific bacteria varies between individuals. Consequently,  
21  
22 129 innate immunity is considered to be a contributing factor in the development of complicated  
23  
24 130 appendicitis [15]. In conclusion, several factors have been proposed to take part in the  
25  
26 131 development of appendicitis, most importantly obstruction of the lumen and bacterial  
27  
28  
29 132 infection with this research largely focusing on complicated acute appendicitis [5-7, 16, 17].  
30  
31  
32 133 Antimicrobials decrease GM diversity, richness and species variation, and cause a perturbation  
33  
34 134 in its overall balance. Particularly broad-spectrum antibiotics have been shown to have a long-  
35  
36 135 term effect on GM profile. [18, 19] A prolonged disturbance in GM and the following imbalance  
37  
38  
39 136 with the host and its immune system have been associated with a variety of diseases, such as  
40  
41 137 inflammatory bowel disease [20] and type 2 diabetes [21]. Antibiotic use can further lead to  
42  
43 138 increased prevalence of antibiotic resistant bacteria and antibiotic resistance genes [22-24].  
44  
45  
46 139 Although the effects of antibiotic treatment on the development of antimicrobial resistance  
47  
48 140 (AMR) development is less clear in countries with lower prevalence of resistant bacteria [25,  
49  
50 141 26], the evaluation of antibiotic treatment effects on GM is essential in the treatment of acute  
51  
52  
53 142 appendicitis.  
54  
55  
56 143 Appendectomy has unquestionably been the standard treatment for acute appendicitis for over  
57  
58 144 a century with more than 300 000 appendectomies performed annually in the United States  
59  
60

1  
2  
3 145 [3]. The original APPAC (APPendicitis ACuta) trial reported that at long-term follow-up, the  
4  
5 146 majority of patients with computed tomography (CT) confirmed uncomplicated acute  
6  
7  
8 147 appendicitis were successfully treated with antibiotics, and those patients that required later  
9  
10 148 appendectomy did not have increased or major complications [27, 28]. Antibiotic therapy for  
11  
12 149 CT-confirmed uncomplicated acute appendicitis has been shown to be safe, efficient and cost-  
13  
14  
15 150 effective both in adult and paediatric patients [29-33]. APPAC II trial aims to optimise antibiotic  
16  
17 151 treatment for CT confirmed uncomplicated acute appendicitis in order to both shorten the  
18  
19  
20 152 hospital stay and restrict the antibacterial spectrum. The APPAC III trial aims to assess  
21  
22 153 symptomatic treatment of uncomplicated acute appendicitis and the role of antibiotics in the  
23  
24 154 resolution of uncomplicated appendicitis. The MAPPAC (Microbiology APPendicitis ACuta) trial  
25  
26 155 patient enrolment is based on the ongoing APPAC II and APPAC III randomised multicentre  
27  
28  
29 156 clinical trials of our study group. To our knowledge, there are so far no similar large  
30  
31 157 microbiological studies focusing on acute appendicitis performed in conjunction with large  
32  
33  
34 158 clinical trials with prospective access to both uncomplicated and complicated appendicitis  
35  
36 159 patients. MAPPAC trial aims to evaluate the possible role and differences in the microbiological  
37  
38 160 etiology of complicated and uncomplicated appendicitis with a special reference to the  
39  
40  
41 161 presence of an appendicolith. In addition, MAPPAC aims to evaluate the immunological and  
42  
43 162 microbiological factors involved in appendicitis recurrence after successful initial antibiotic  
44  
45 163 therapy. In the longitudinal study arm we also aim to assess the effects of antibiotic and placebo  
46  
47  
48 164 treatment on the GM profile and the effects of hospital stay duration on the AMR reservoir of  
49  
50 165 the GM.

## 57 167 **METHODS AND ANALYSIS**

### 59 168 **Study Design**

1  
2  
3 169 MAPPAC is a prospective clinical trial with a single-centre and a multicentre arm. The single-  
4  
5  
6 170 centre study arm at Turku University Hospital, aims to determine the possible differences in  
7  
8 171 the etiology of complicated and uncomplicated acute appendicitis with a special reference to  
9  
10 172 the role and etiology of appendicolith. In the multi-centre longitudinal arm, MAPPAC trial  
11  
12  
13 173 concentrates on assessment of possible immunological and microbiological factors involved  
14  
15 174 in initial non-responders or appendicitis recurrence after successful initial antibiotic therapy  
16  
17 175 at long-term follow-up. In this longitudinal multicentre study arm we also aim to evaluate the  
18  
19  
20 176 effects of antibiotic and placebo treatment on the GM and the effects of the duration of the  
21  
22 177 hospital stay on the possible AMR reservoir within the GM. MAPPAC protocol was drafted in  
23  
24 178 accordance with the SPIRIT statement [34]. The trial has been registered at both EudraCT  
25  
26  
27 179 (2016-003655-29) and clinicaltrials.gov (NCT03257423).  
28  
29 180 The three ongoing study entities (APPAC II, APPAC III, and MAPPAC) are strongly  
30  
31 181 interconnected having a common study aim and a patient enrolment population (Figure 1).  
32  
33  
34 182 APPAC II trial is a randomised open-label, non-inferiority multicentre trial to compare  
35  
36 183 intravenous antibiotic therapy followed by per oral (p.o.) antibiotics with p.o. monotherapy  
37  
38 184 in the treatment of uncomplicated acute appendicitis (NCT03236961)[35]. APPAC III trial is a  
39  
40  
41 185 randomised double-blind, placebo-controlled, superiority multicentre study to compare  
42  
43 186 antibiotic therapy with placebo in the treatment of uncomplicated acute appendicitis  
44  
45 187 (NCT03234296) [36]. All incoming patients are informed of all ongoing trials. All patients  
46  
47  
48 188 invited to participate in APPAC II and III trials will be invited to participate in the MAPPAC  
49  
50 189 trial. Patients recruited for the APPAC II or III trial are asked to sign a separate consent form  
51  
52 190 for the MAPPAC trial allowing for the use of their data and collection of microbiological  
53  
54  
55 191 samples. The study flow is illustrated in Figure 2.  
56  
57  
58  
59  
60

1  
2  
3  
4  
5  
6  
7  
8  
9  
10  
11  
12  
13  
14  
15  
16  
17  
18  
19  
20  
21  
22  
23  
24  
25  
26  
27  
28  
29  
30  
31  
32  
33  
34  
35  
36  
37  
38  
39  
40  
41  
42  
43  
44  
45  
46  
47  
48  
49  
50  
51  
52  
53  
54  
55  
56  
57  
58  
59  
60

## 192 **Patient selection**

193 Eligible for inclusion are all adult patients 18 – 60 years old presenting with either a CT-  
194 confirmed uncomplicated or complicated appendicitis or patients with a suspected recurrent  
195 appendicitis after initial successful antibiotic therapy for uncomplicated acute appendicitis.  
196 MAPPAC single-centre arm will enroll patients with both uncomplicated (both APPAC II and  
197 III trials and patients declining to participate in these trials undergoing appendectomy) and  
198 complicated acute appendicitis (patients excluded from APPAC II and APPAC III trials) at  
199 Turku University Hospital. The enrolment of uncomplicated acute appendicitis patients  
200 participating in the APPAC III trials will be performed at all APPAC III hospitals (all five Finnish  
201 university hospitals: Turku, Helsinki, Tampere, Oulu, and Kuopio). In addition, all of the  
202 APPAC II and III trial patients having to undergo appendectomy either for a treatment failure  
203 during the primary hospitalisation or for suspected recurrence after a successful initial non-  
204 operative treatment will be enrolled in the MAPPAC trial at all ten study hospitals (all five  
205 university and five central hospitals in Finland: Jyväskylä, Pori, Mikkeli, Seinäjoki and  
206 Rovaniemi).

## 210 **Study setting and feasibility**

211 The study was initiated at Turku University Hospital in April 2017, with the study  
212 commencing at all study centres by fall 2017. The majority of MAPPAC patient enrolment is  
213 evaluated to be completed in conjunction with the APPAC II and III trials latest by fall 2020.  
214 Patient recruitment in the MAPPAC trial will continue for a minimum of five years after APPAC  
215 II and III trial enrolment completion based on the planned microbiological assessment of late  
216 appendicitis recurrence.

1  
2  
3  
4  
5  
6  
7  
8  
9  
10  
11  
12  
13  
14  
15  
16  
17  
18  
19  
20  
21  
22  
23  
24  
25  
26  
27  
28  
29  
30  
31  
32  
33  
34  
35  
36  
37  
38  
39  
40  
41  
42  
43  
44  
45  
46  
47  
48  
49  
50  
51  
52  
53  
54  
55  
56  
57  
58  
59  
60

## 217 **Interventional groups**

218 Four interventional groups within MAPPAC are defined as follows:

- 219 1. Patients with uncomplicated acute appendicitis participating in the APPAC II trial at  
220 Turku University Hospital (MAPPAC single-centre treatment arm) receiving either i.v.  
221 antibiotic therapy followed by p.o. antibiotics (i.v. + p.o.) or patients receiving p.o.  
222 antibiotic monotherapy (p.o.). *I.v. + p.o.* group receives intravenous ertapenem 1 g once  
223 daily for two days followed by p.o. levofloxacin 500 mg once daily and metronidazole  
224 500 mg three times per day for 5 days. *P.o.* group receives *p.o.* moxifloxacin 400 mg  
225 once daily for seven days.
- 226 2. Patients with uncomplicated acute appendicitis participating in the double-blinded  
227 APPAC III trial at all five university hospitals (MAPPAC multicentre treatment arm)  
228 receiving either antibiotic therapy or placebo treatment. *Antibiotic treatment* is  
229 intravenous ertapenem 1 g once per day for three days followed by p.o. levofloxacin  
230 500 mg once per day and metronidazole 500 mg three times per day for four days.  
231 *Placebo treatment* entails intravenous placebo once per day for three days followed by  
232 per oral placebo three times per day for four days.
- 233 3. Patients with uncomplicated acute appendicitis or suspected recurrent appendicitis  
234 undergoing appendectomy  
235 The patients in this group will undergo laparoscopic appendectomy either after  
236 declining to participate in the APPAC II or APPAC III trials (MAPPAC single-centre  
237 treatment arm at Turku University Hospital) or after suspected treatment failure of  
238 non-operative treatment or after presenting with suspected appendicitis recurrence  
239 after initial successful non-operative treatment (MAPPAC multicentre treatment arm,  
240 all APPAC II and APPAC III hospitals)
- 241 4. Patients with complicated acute appendicitis undergoing appendectomy

1  
2  
3 242 The patients in this group will undergo laparoscopic appendectomy and are eligible for  
4  
5 243 enrolment only in the MAPPAC single-centre study arm at Turku University Hospital.  
6  
7

8 244  
9  
10 245 **Sample collection**

11  
12 246 **Rectal swabs** are collected from all patients in the emergency department prior to antibiotic  
13  
14  
15 247 treatment or surgery (timepoint 0). Further, rectal swabs are collected on the 1<sup>st</sup> day for  
16  
17 248 APPAC II patients and for APPAC III patients on the 1<sup>st</sup> day (Turku University Hospital) and  
18  
19  
20 249 on the 3<sup>rd</sup> day (all five university hospitals). At each time point, two rectal swabs are collected:  
21  
22 250 Amies-Coal transport swab for culturing methods (Sarstedt, Nümbrecht, Germany) and  
23  
24 251 Puritan DNA/RNA swab (Puritan Medical products, Guilford, Maine) with shield fluid (Zymo  
25  
26 252 Research, Irvine, Canada) for microbial DNA extraction. The shield fluid in this collection tube  
27  
28  
29 253 allows the transportation at room temperature.

30  
31 254 **Samples from the appendix** are collected from patients undergoing appendectomy for  
32  
33 255 complicated or uncomplicated acute appendicitis and from patients with suspected disease  
34  
35  
36 256 progression during the primary hospitalisation or appendicitis recurrence after successful  
37  
38 257 initial non-operative therapy. Samples include routine histology as well as specific trial swabs  
39  
40  
41 258 and biopsies. The appendix is opened vertically with a sterile scalpel and two swabs are taken  
42  
43 259 similar to the rectal swab (one for culture and one for DNA extraction). Three biopsies are  
44  
45 260 taken at a distance of approximately 2 cm from the base of the appendix. All biopsies are  
46  
47  
48 261 stored at -75 °C, one immediately and the rest two are first embedded in RNAlater solution  
49  
50 262 (Thermo Fisher Scientific, Waltham, MA, USA). Possible appendicoliths are collected into a  
51  
52 263 sterile container, frozen and stored at -75 °C. If appendectomy is performed during office  
53  
54  
55 264 hours, appendiceal samples are collected by study personnel and an additional swab for  
56  
57 265 anaerobic culture is then collected and cultured in connection with collection and  
58  
59  
60 266 immediately transferred into an anaerobic jar. During on call hours, the samples are collected

1  
2  
3 267 by surgeons and the -75 °C appendiceal biopsy may not be collected. These appendiceal  
4  
5  
6 268 samples are collected only in the Turku University Hospital and at the other study hospitals  
7  
8 269 only a swab sample (transport tube with DNA shield fluid) from the appendix of non-  
9  
10 270 responders and patients with appendicitis recurrence is collected.

11  
12  
13 271 **Additional serum samples** are collected from all the patients recruited in MAPPAC trial at  
14  
15 272 Turku University Hospital and for APPAC III trial at all five study hospitals for the  
16  
17 273 identification of possible disease-form specific inflammatory biomarkers in serum. The serum  
18  
19  
20 274 samples are divided into six aliquots prior freezing at -75 °C.

### 21 22 275 **Questionnaire**

23  
24 276 MAPPAC patients are asked to fill a primary questionnaire during the initial hospitalisation  
25  
26  
27 277 covering topics possibly affecting their GM profile: chronic diseases, special diets, smoking  
28  
29 278 and alcohol consumption, travel history, antibiotic intake, other medications (12 months  
30  
31  
32 279 prior the sampling), consumption of probiotics and other dietary supplements, recent  
33  
34 280 diarrhoea and/or vomiting, Bristol stool form scale estimate [37] measuring stool consistency  
35  
36 281 (1 for very hard stool to 7 for diarrhoea) and the average number of defecations per day.

### 37 38 282 **Follow-up during the hospitalisation**

39  
40  
41 283 During the hospitalisation the following parameters will be recorded every 24 hours: pain  
42  
43 284 assessed by Visual Analogue Scale (VAS), leukocyte count, C-reactive protein (CRP),  
44  
45  
46 285 temperature and clinical findings at patient reassessment. If the patient is suspected of not  
47  
48 286 responding to the randomized therapy based on clinical deterioration signs combined with  
49  
50 287 laboratory findings (signs of peritonitis, persisting fever, increasing pain, white blood cell  
51  
52  
53 288 count or CRP), the patient will be operated based on the surgeon's decision and the reasons  
54  
55 289 for proceeding to appendectomy will be recorded. For appendectomy, laparoscopic approach  
56  
57 290 is recommended. The operative findings and the histopathology of the appendix will be  
58  
59  
60 291 recorded. After the initial hospitalisation, recurrent acute appendicitis will be diagnosed on a

1  
2  
3 292 clinical basis and patients with a suspected recurrence of appendicitis will undergo a  
4  
5 293 laparoscopic appendectomy.

### 8 294 **Follow-up**

10 295 The specific MAPPAC trial follow-up is conducted for patients also participating in the APPAC  
11  
12 296 II and III trials with collection of three faecal samples at home (at one week, six months and  
13  
14  
15 297 one year). Follow-up samples at home are not collected in MAPPAC interventional groups  
16  
17 298 undergoing appendectomy. The follow-up faecal sample is collected into 10 ml DNA/RNA  
18  
19 299 Shield Faecal Collection Tube (Zymo Research) enabling transportation and storage at room  
20  
21  
22 300 temperature prior to DNA extraction. Patients also deliver a faecal sample into a gel tube for  
23  
24 301 culture purposes. A follow-up questionnaire is collected at 6 and 12 months consisting of the  
25  
26 302 same questions as the preliminary questionnaire covering the time between hospital  
27  
28  
29 303 discharge and the follow-up time point. Other follow-up for patients in APPAC II trial will  
30  
31 304 include a phone interview at one week after discharge, APPAC III trial patients have their first  
32  
33 305 follow-up call 2-4 days after discharge from the hospital and then at 10 days, both trials at two  
34  
35  
36 306 months and at one, three, five and ten years. The follow-up for APPAC III patients will include  
37  
38 307 laboratory tests (leukocyte count, CRP, additional follow-up serum samples).

### 43 309 **Outcome parameters**

45 310 Based on the MAPPAC trial design, no specific primary endpoint can be determined. The  
46  
47 311 following parameters will be recorded for all patients: age, gender, Body mass index, clinical  
48  
49  
50 312 findings on admission (tympanic temperature, nausea, pain or tenderness in the right lower  
51  
52 313 abdominal quadrant, pain migration, VAS pain scores, white blood cell count, CRP, findings on  
53  
54  
55 314 CT imaging), and data on primary and follow-up questionnaires. Blood cultures will be  
56  
57 315 obtained from patients with complicated acute appendicitis and for APPAC II and III trial  
58  
59 316 patients at Turku University Hospital.



1  
2  
3  
4  
5  
6  
7  
8  
9  
10  
11  
12  
13  
14  
15  
16  
17  
18  
19  
20  
21  
22  
23  
24  
25  
26  
27  
28  
29  
30  
31  
32  
33  
34  
35  
36  
37  
38  
39  
40  
41  
42  
43  
44  
45  
46  
47  
48  
49  
50  
51  
52  
53  
54  
55  
56  
57  
58  
59  
60

317 The following outcome parameters will be assessed based on the sample types collected:

318 *Parameters from the appendix i.e. patients undergoing appendectomy*

319 Operative details and histopathology of the appendix, host transcriptomics, proteomics, and  
320 immunohistochemical analysis from appendiceal biopsy, possible appendicolith composition,  
321 morphology, and classification.

322 *Microbiological parameters from the rectal and appendiceal swabs, faecal and appendiceal*  
323 *samples*

324 Microbial profile, metagenome and metatranscriptome, name of different identified bacterial  
325 species, number of species identified both by NGS and culture methods, antimicrobial  
326 susceptibility test results, the presence of AMR related genes by molecular analysis methods,  
327 bacterial genome data of AMR or virulence genes, all microbial data combined with clinical and  
328 additional data.

329 *Serum samples*

330 In order to compare possible differences between patients with successful antibiotic therapy  
331 to patients with either failed antibiotic therapy or complicated acute appendicitis, the serum  
332 samples will be analysed to identify possible inflammatory or immunological markers.  
333 Different cytokines, chemokines and growth factors as well as serum metabolome will be  
334 included in these analyses. Additional analysis include the level and activity of CD73 and  
335 soluble vascular adhesion protein-1 (VAP-1). List for analytes that will be screened is  
336 provided in the supplementary methods.

337  
338 Laboratory methods used in the trial to analyse the collected samples are described in detail  
339 in the online supplementary material.

1  
2  
3 342 **Statistical analysis**

4  
5 343 Based on the explorative research nature of the MAPPAC study, there is not enough  
6  
7  
8 344 information available about the study aims to enable sample size calculations. Categorical  
9  
10 345 variables of the study will be characterised using frequencies and percentages. For continuous  
11  
12 346 variables means and standard deviations or medians with range and 25th and 75th  
13  
14  
15 347 percentiles will be used. In case of categorical outcomes, groups will be compared using  
16  
17 348 Pearson's Chi-squared -test and if further analyses will be needed, logistic regression models  
18  
19 349 will be used. Group differences in continuous variables will be evaluated using independent  
20  
21  
22 350 samples t-test, analysis of variance (ANOVA) or non-parametric methods, if needed.  
23  
24 351 Associations between continuous variables will be evaluated using correlation coefficients  
25  
26 352 and linear regression analysis and if adjustments are needed, linear models will be used.  
27  
28  
29 353 Continuous outcomes measured in several time-points will be analysed using linear mixed  
30  
31 354 models. For categorical outcomes with repeated measurements generalised linear mixed  
32  
33 355 models will be used. The assumptions of the methods will be checked for justification of the  
34  
35  
36 356 analyses and transformations will be used for the variables, if needed. The study site  
37  
38 357 differences will be evaluated in statistical models and if major differences are detected, more  
39  
40  
41 358 complicated statistical models will be used in the analyses. Two-sided p-values will be used  
42  
43 359 and p-values less than 0.05 will be considered statistically significant. The measurements with  
44  
45 360 missing data will automatically be excluded from the analyses of the variables in concern.  
46  
47  
48 361 Statistical analyses will be performed using SAS System for Windows, Version 9.4 and JMP Pro  
49  
50 362 13 or later versions (SAS Institute, Cary, NC, USA).

51  
52 363  
53  
54  
55 364 **Patients and public involvement**

56  
57 365 The MAPPAC research questions and outcome measures were based on the results of original  
58  
59 366 APPAC trial [27] and the study protocol was developed together with the study group

1  
2  
3 367 surgeons, clinical microbiologists and immunologists. Patients were not directly involved in  
4  
5 368 the design of this study and the burden of study participation was not assessed by patients  
6  
7  
8 369 themselves. Upon recruitment, patients are well informed of all aspects of the trial including  
9  
10 370 antibiotic or symptomatic therapy of CT-confirmed uncomplicated acute appendicitis,  
11  
12 371 difference between complicated and uncomplicated acute appendicitis, treatment success,  
13  
14  
15 372 possible late recurrence, and safety in order to help patients make an informed decision about  
16  
17 373 trial participation. Patients also receive additional instructions in a phone call made prior to  
18  
19  
20 374 follow-up sample collection at 6 and 12 months. After completion of data collection and  
21  
22 375 analysis, the patients will be informed of the study results and they will be provided with an  
23  
24 376 opportunity to ask further questions.  
25  
26  
27 377

## 28 29 378 **ETHICS AND DISSEMINATION**

### 30 31 379 **Ethics**

32  
33  
34 380 This protocol has been accepted by the Ethical Committee of the Hospital district of Southwest  
35  
36 381 Finland (Turku University Hospital) and Finnish Medicines Agency (Fimea). The trial will be  
37  
38 382 conducted in compliance with the Declaration of Helsinki.  
39

### 40 41 383 **Data collection and confidentiality**

42  
43 384 All data and samples are handled confidentially and the information in the datasets is non-  
44  
45 385 identifiable. Data are gathered during the emergency room visit, hospitalisation for acute  
46  
47  
48 386 appendicitis, clinical observations, and follow-up phone calls. The main investigators will be  
49  
50 387 in charge of the common database with full access to the data which is, otherwise strictly  
51  
52 388 limited. As the MAPPAC and APPAC II and III trials are based on the same patient population,  
53  
54  
55 389 the interventions partly overlap and the enrolled patients are informed about this overlapping  
56  
57 390 of the trials and the acquired data.  
58  
59  
60 391

1  
2  
3  
4  
5  
6  
7  
8  
9  
10  
11  
12  
13  
14  
15  
16  
17  
18  
19  
20  
21  
22  
23  
24  
25  
26  
27  
28  
29  
30  
31  
32  
33  
34  
35  
36  
37  
38  
39  
40  
41  
42  
43  
44  
45  
46  
47  
48  
49  
50  
51  
52  
53  
54  
55  
56  
57  
58  
59  
60

### 392 **Withdrawal**

393 Patients are informed of their right to withdraw from the study without explanation at any  
394 time. In case of patient withdrawal, they will be asked for permission to use their data.

### 395 **Dissemination plan**

396 Results from this trial and reported in articles which will be published in peer-reviewed  
397 journals. Results are also presented at national and international conferences to further  
398 distribute this research.

For peer review only

1  
2  
3  
4  
5  
6  
7  
8  
9  
10  
11  
12  
13  
14  
15  
16  
17  
18  
19  
20  
21  
22  
23  
24  
25  
26  
27  
28  
29  
30  
31  
32  
33  
34  
35  
36  
37  
38  
39  
40  
41  
42  
43  
44  
45  
46  
47  
48  
49  
50  
51  
52  
53  
54  
55  
56  
57  
58  
59  
60**DISCUSSION**

As non-operative treatment for uncomplicated acute appendicitis has been shown to be efficient and safe also at long-term [27-30, 33, 38] and cost-effective [39], understanding both the etiology of the different appendicitis forms and potentially predicting the recurrences has become of utmost clinical importance in order to thoroughly evaluate all the optimization of the different treatment options. The MAPPAC trial aims to assess this largely unknown microbiological etiology of the different disease forms of acute appendicitis. Further, the whole microbial entity i.e. profile both in the appendix and in gut is studied, and their role in the disease severity and form is assessed. In addition, the effects of antibiotic and placebo treatments on the GM profile and the effects of the duration of the hospital stay on the AMR reservoir of the GM will be assessed. With the longitudinal study design, both the immediate and long-term effects of the antibiotic treatment on GM can be analysed. As the hospital stay differs in APPAC II and APPAC III patients, the effects of the duration of the hospital stay on the emergence of resistant bacteria and AMR reservoir can be evaluated. Moreover, the comparison of the effects of antibiotic treatment on GM between two different administration routes (p.o. and i.v. + p.o.) is possible.

In the 5-year follow up of the original APPAC trial, 39 % (n=100) of the antibiotic group patients underwent appendectomy for either during the primary hospitalization or for suspected late appendicitis recurrence. Out of these hundred patients, 85 were operated on for suspected recurrence and 78 patients had a histopathologically confirmed acute appendicitis [28]. Understanding the pathophysiology and contributing factors in recurrent appendicitis are of vital clinical importance in evaluating the optimal treatment paradigms for uncomplicated acute appendicitis. Therefore, MAPPAC trial is assessing both initial non-responders to antibiotic therapy and recurrent appendicitis after successful initial antibiotic treatment and

1  
2  
3 441 these results may provide novel tools to predict the potential recurrence risk and thus help to  
4  
5 442 assess the optimal treatment choice for patients with uncomplicated acute appendicitis.  
6  
7  
8

### 9 443 **Strengths and limitations**

10  
11 444 MAPPAC has a strong synergy between APPAC II and III studies enabling the enrolment of both  
12  
13 445 uncomplicated and complicated acute appendicitis patients in a large prospective series with  
14  
15  
16 446 associated clinical data to be assessed in conjunction with the microbiological and  
17  
18 447 immunological findings. In many aspects, MAPPAC is an exploratory study of possible  
19  
20 448 associations of whole microbial community and host immune characteristics with  
21  
22  
23 449 uncomplicated vs. complicated appendicitis and antibiotic response among patients in clinical  
24  
25 450 trials treated with and without antibiotics. MAPPAC trial aims to generate hypotheses to better  
26  
27 451 understand the role of disease progression and host susceptibility for future studies; i.e.  
28  
29  
30 452 determination of one primary outcome is insufficient for the study, as several factors are  
31  
32 453 indispensable for the understanding of etiology and the effects of antibiotics on GM all provided  
33  
34 454 with this unique set of microbiological samples. To our knowledge, only one previous study  
35  
36  
37 455 [12] has characterized the adult appendix microbiota during appendicitis in adult patients  
38  
39 456 using NGS technique and to date no reports on the structure and physicochemical contents of  
40  
41  
42 457 appendicoliths exists. Using these assessments is a strength in our study. Further, to our  
43  
44 458 knowledge this is the first trial aiming to prospectively assess the possible microbiological  
45  
46 459 and/or immunological etiology of appendicitis recurrence after a successful initial conservative  
47  
48  
49 460 treatment with antibiotics or symptomatic therapy and primary non-responders to  
50  
51 461 conservative treatment of uncomplicated acute appendicitis. One of the main hypothesis of the  
52  
53 462 MAPPAC study is that the microbial composition of appendix differs between CT differentiated  
54  
55  
56 463 complicated and uncomplicated appendicitis. Therefore, strong element of the study is that all  
57  
58 464 patients included in the study are imaged with CT protocol. CT scan is the gold standard for  
59  
60

1  
2  
3 465 acute appendicitis imaging and this near perfect accuracy of CT adds to the reliability of the  
4  
5  
6 466 clinical data and appendicitis severity also in the patients with uncomplicated acute  
7  
8 467 appendicitis without a histopathological confirmation of the appendix.

9  
10 468 The study limitations include the difficult challenge of conducting prospective clinical trials in  
11  
12  
13 469 the emergency setting. It is expected that all eligible patients may not be evaluated for  
14  
15 470 enrolment or some patients may not have all study samples available as the recruitment is  
16  
17 471 performed by a large number of surgeons on call. The lack of healthy control group is a  
18  
19  
20 472 limitation in the study regarding both the etiology and in determining the effects of antibiotics  
21  
22 473 on GM, as the results cannot be fully distinguished from the effects of acute appendicitis.

23  
24 474

25  
26  
27 475

28  
29 476

30  
31 477

32  
33  
34 478

35  
36 479

37  
38 480

39  
40  
41 481

42  
43 482

44  
45 483

46  
47  
48 484

49  
50 485

51  
52 486

53  
54  
55 487

56  
57 488

58  
59 489

60

1  
2  
3  
4  
5  
6  
7  
8  
9  
10  
11  
12  
13  
14  
15  
16  
17  
18  
19  
20  
21  
22  
23  
24  
25  
26  
27  
28  
29  
30  
31  
32  
33  
34  
35  
36  
37  
38  
39  
40  
41  
42  
43  
44  
45  
46  
47  
48  
49  
50  
51  
52  
53  
54  
55  
56  
57  
58  
59  
60

### **490 Authors' contributions**

491 All authors have contributed to the design of this trial protocol. PS is the chief investigator. PS,  
492 SV, AJH, EM, SJ, JG, and SS have initiated the project. The protocol was drafted by PS, which  
493 was refined by SV, AJH, EM, SS, SJ, JG, HM, EE, and SH. Statistical advice was provided by SH.  
494 SV was responsible for drafting the manuscript, which was refined by PS, AJH, and EM. All  
495 authors have read and approved the final manuscript.

### **496 Funding**

497 This work was supported by clinical research grants from Sigrid Juselius foundation, the  
498 Academy of Finland, Mary and Georg C. Ehrnrooth foundation, The Maud Kuistila Memorial  
499 Foundation, Doctoral Programme of Clinical Investigation of University of Turku, Tyks-Sapa  
500 Research Funds, Finland, Turku University and Turku University foundation. This is a  
501 researcher oriented trial.

### **502 Competing interests**

503 Authors declare they have no competing interests.

### **504 Acknowledgements**

505 Due to the multicentre nature of the trial, not all supporting researchers are mentioned by  
506 name in the protocol article. In addition, The APPAC collaborative study group lead by primary  
507 investigator Paulina Salminen includes the following contributors: Sallinen V., Leppäniemi A.,  
508 Rautio T., Meriläinen S., Nordström P., Laukkarinen J., Rantala T., Savolainen H., Aarnio M.,  
509 Mattila A., Haijanen J., Sävelä E-L., Imre I., Paajanen H., Rintala J., Pinta T., Sippola T., and  
510 Böckerman P. Local investigators, who are responsible for execution of the APPAC II and/or  
511 APPAC III trials in addition to execution of the applicable parts of the MAPPAC trial and valid  
512 data gathering. The surgical departments of the following Finnish Hospitals contribute to the  
513 execution of this trial: University hospitals of Turku, Helsinki, Oulu, Tampere, and Kuopio,  
514 central hospitals of Jyväskylä, Pori, Mikkeli, Seinäjoki, and Rovaniemi. In addition, we



1  
2  
3 515 acknowledge all supporting surgeons, radiologists, emergency medicine physicians, nurses  
4  
5 516 and technical staff in the laboratory.  
6  
7

8 517

9  
10 518 **REFERENCES**

11 519

12 520

13 521

14  
15 521 1 Addiss DG, Shaffer N, Fowler BS, et al. The epidemiology of appendicitis and appendectomy  
16 522 in the United States, *Am J Epidemiol* 1990;132:910-25.

17

18 523 2 Ferris M, Quan S, Kaplan B, et al. The Global Incidence of Appendicitis: A Systematic Review  
19 524 of Population-based Studies, *Annals of Surgery* 2017;266:237-41  
20 525 doi:10.1097/SLA.0000000000002188.

21 526

22  
23 526 3 Livingston EH, Fomby TB, Woodward WA, et al. Epidemiological Similarities Between  
24 527 Appendicitis and Diverticulitis Suggesting a Common Underlying Pathogenesis, *Archives of*  
25 528 *Surgery* 2011;146:308-14 doi:10.1001/archsurg.2011.2.

26

27  
28 529 4 Forbes GB, Lloyd-Davies RW. Calculous disease of the vermiform appendix, *Gut* 1966;7:583-  
29 530 92 doi:10.1136/gut.7.6.583.

30

31 531 5 Lamps LW. Infectious Causes of Appendicitis, *Infectious Disease Clinics of North America*  
32 532 2010;24:995-1018 doi:10.1016/j.idc.2010.07.012.

33

34  
35 533 6 Swidsinski A, Doerffel Y, Loening-Baucke V, et al. Acute appendicitis is characterised by local  
36 534 invasion with *Fusobacterium nucleatum/necrophorum*, *Gut* 2011;60:34-40  
37 535 doi:10.1136/gut.2009.191320.

38

39 536 7 Zhong D, Brower-Sinning R, Firek B, et al. Acute appendicitis in children is associated with  
40 537 an abundance of bacteria from the phylum *Fusobacteria*, *J Pediatr Surg* 2014;49:441-6  
41 538 doi:10.1016/j.jpedsurg.2013.06.026 [doi].

42

43  
44 539 8 Jindal N, Kaur GD, Arora S, et al. Bacteriology of acute appendicitis with special reference to  
45 540 anaerobes, *Indian J Pathol Microbiol* 1994;37:299-305.

46

47  
48 541 9 Martirosian G, Bulanda M, Wojcik-Stojek B, et al. Acute appendicitis: the role of  
49 542 enterotoxigenic strains of *Bacteroides fragilis* and *Clostridium difficile*, *Med Sci Monit*  
50 543 2001;7:382-6.

51

52 544 10 Chen CY, Chen YC, Pu HN, et al. Bacteriology of acute appendicitis and its implication for  
53 545 the use of prophylactic antibiotics, *Surg Infect (Larchmt)* 2012;13:383-90  
54 546 doi:10.1089/sur.2011.135 [doi].

55

56  
57 547 11 Reinisch A, Malkomes P, Habbe N, et al. Bad bacteria in acute appendicitis: rare but  
58 548 relevant, *Int J Colorectal Dis* 2017;32:1303-11 doi:10.1007/s00384-017-2862-0 [doi].

59

60

1

2

3 549 12 Guinane CM, Tadrous A, Fouhy F, et al. Microbial composition of human appendices from  
4 550 patients following appendectomy, *MBio* 2013;4:12.

6

7 551 13 Peeters T, Penders J, Smeekens SP, et al. The fecal and mucosal microbiome in acute  
8 552 appendicitis patients: an observational study, *Future Microbiol* 2019;14:111-27  
9 553 doi:10.2217/fmb-2018-0203 [doi].

10

11 554 14 Bennion RS, Baron EJ, Thompson JE, Jr, et al. The bacteriology of gangrenous and  
12 555 perforated appendicitis--revisited, *Ann Surg* 1990;211:165-71 doi:10.1097/00000658-  
14 556 199002000-00008 [doi].

15

16 557 15 Rivera-Chavez FA, Peters-Hybki DL, Barber RC, et al. Innate immunity genes influence the  
17 558 severity of acute appendicitis, *Ann Surg* 2004;240:269-77 doi:00000658-200408000-00012  
18 559 [pii].

20

21 560 16 Reinisch A, Malkomes P, Habbe N, et al. Bad bacteria in acute appendicitis: rare but  
22 561 relevant, *Int J Colorectal Dis* 2017;32:1303-11 doi:10.1007/s00384-017-2862-0.

23

24 562 17 Martirosian G, Bulanda M, Wojcik-Stojek B, et al. Acute appendicitis: the role of  
25 563 enterotoxigenic strains of *Bacteroides fragilis* and *Clostridium difficile*, *Med Sci Monit*  
26 564 2001;7:382-6.

28

29 565 18 Dethlefsen L, Relman DA. Incomplete recovery and individualized responses of the human  
30 566 distal gut microbiota to repeated antibiotic perturbation, *Proc Natl Acad Sci U S A* 2011;108  
31 567 Suppl 1:4554-61 doi:10.1073/pnas.10000871107 [doi].

32

33 568 19 Jernberg C, Lofmark S, Edlund C, et al. Long-term ecological impacts of antibiotic  
34 569 administration on the human intestinal microbiota, *ISME J* 2007;1:56-66 doi:ismej20073 [pii].

36

37 570 20 Manichanh C, Rigottier-Gois L, Bonnaud E, et al. Reduced diversity of faecal microbiota in  
38 571 Crohn's disease revealed by a metagenomic approach, *Gut* 2006;55:205-11  
39 572 doi:gut.2005.073817 [pii].

41

42 573 21 Qin J, Li Y, Cai Z, et al. A metagenome-wide association study of gut microbiota in type 2  
43 574 diabetes, *Nature* 2012;490:55-60 doi:10.1038/nature11450 [doi].

44

45 575 22 Lindgren M, Lofmark S, Edlund C, et al. Prolonged impact of a one-week course of  
46 576 clindamycin on *Enterococcus* spp. in human normal microbiota, *Scand J Infect Dis*  
47 577 2009;41:215-9 doi:10.1080/00365540802651897 [doi].

49

50 578 23 Raymond F, Ouameur AA, Deraspe M, et al. The initial state of the human gut microbiome  
51 579 determines its reshaping by antibiotics, *ISME J* 2016;10:707-20 doi:10.1038/ismej.2015.148  
52 580 [doi].

53

54 581 24 Jakobsson HE, Jernberg C, Andersson AF, et al. Short-term antibiotic treatment has  
55 582 differing long-term impacts on the human throat and gut microbiome, *PLoS One* 2010;5:e9836  
56 583 doi:10.1371/journal.pone.0009836 [doi].

58

59

60

- 1  
2  
3 584 25 Buelow E, Bello Gonzalez, T D J, Fuentes S, et al. Comparative gut microbiota and resistome  
4 585 profiling of intensive care patients receiving selective digestive tract decontamination and  
5 586 healthy subjects, *Microbiome* 2017;5:z doi:10.1186/s40168-017-0309-z [doi].  
7  
8 587 26 Card RM, Mafura M, Hunt T, et al. Impact of Ciprofloxacin and Clindamycin Administration  
9 588 on Gram-Negative Bacteria Isolated from Healthy Volunteers and Characterization of the  
10 589 Resistance Genes They Harbor, *Antimicrob Agents Chemother* 2015;59:4410-6  
11 590 doi:10.1128/AAC.00068-15 [doi].  
12  
13  
14 591 27 Salminen P, Paajanen H, Rautio T, et al. Antibiotic Therapy vs Appendectomy for Treatment  
15 592 of Uncomplicated Acute Appendicitis: The APPAC Randomized Clinical Trial, *JAMA*  
16 593 2015;313:2340-8.  
17  
18  
19 594 28 Salminen P, Tuominen R, Paajanen H, et al. Five-Year Follow-up of Antibiotic Therapy for  
20 595 Uncomplicated Acute Appendicitis in the APPAC Randomized Clinical Trial, *JAMA*  
21 596 2018;320:1259-65 doi:10.1001/jama.2018.13201 [doi].  
22  
23 597 29 Sakran JV, Mylonas KS, Gryparis A, et al. Operation versus antibiotics--The "appendicitis  
24 598 conundrum" continues: A meta-analysis, *J Trauma Acute Care Surg* 2017;82:1129-37  
25 599 doi:10.1097/TA.0000000000001450 [doi].  
26  
27  
28 600 30 Sallinen V, Akl EA, You JJ, et al. Meta-analysis of antibiotics versus appendicectomy for non-  
29 601 perforated acute appendicitis, *Br J Surg* 2016;103:656-67 doi:10.1002/bjs.10147 [doi].  
30  
31 602 31 Podda M, Gerardi C, Cillara N, et al. Antibiotic Treatment and Appendectomy for  
32 603 Uncomplicated Acute Appendicitis in Adults and Children: A Systematic Review and Meta-  
33 604 analysis, *Ann Surg* 2019 doi:10.1097/SLA.0000000000003225 [doi].  
34  
35  
36 605 32 Harnoss JC, Probst P, Büchler MW, et al. Antibiotics Versus Appendicectomy for the  
37 606 Treatment of Uncomplicated Acute Appendicitis: An Updated Meta-Analysis of Randomised  
38 607 Controlled Trials by Rollins et al, *World J Surg* 2017;41:2411 doi:10.1007/s00268-016-3864-  
39 608 8.  
40  
41  
42 609 33 Rollins KE, Varadhan KK, Neal KR, et al. Antibiotics Versus Appendicectomy for the  
43 610 Treatment of Uncomplicated Acute Appendicitis: An Updated Meta-Analysis of Randomised  
44 611 Controlled Trials, *World J Surg* 2016;40:2305-18 doi:10.1007/s00268-016-3561-7 [doi].  
45  
46  
47 612 34 Chan A, Tetzlaff JM, Altman DG, et al. SPIRIT 2013 statement: defining standard protocol  
48 613 items for clinical trials, *Ann Intern Med* 2013;158:200-7 doi:10.7326/0003-4819-158-3-  
49 614 201302050-00583.  
50  
51 615 35 Haijanen J, Sippola S, Gronroos J, et al. Optimising the antibiotic treatment of  
52 616 uncomplicated acute appendicitis: a protocol for a multicentre randomised clinical trial  
53 617 (APPAC II trial), *BMC Surg* 2018;18:y doi:10.1186/s12893-018-0451-y [doi].  
54  
55  
56 618 36 Sippola S, Gronroos J, Sallinen V, et al. A randomised placebo-controlled double-blind  
57 619 multicentre trial comparing antibiotic therapy with placebo in the treatment of  
58 620 uncomplicated acute appendicitis: APPAC III trial study protocol, *BMJ Open* 2018;8:023623  
59 621 doi:10.1136/bmjopen-2018-023623 [doi].  
60

1

2

3 622 37 Lewis SJ, Heaton KW. Stool form scale as a useful guide to intestinal transit time, *Scand J*  
 4 623 *Gastroenterol* 1997;32:920-4 doi:10.3109/00365529709011203 [doi].

6 624 38 Vons C, Barry C, Maitre S, et al. Amoxicillin plus clavulanic acid versus appendicectomy for  
 8 625 treatment of acute uncomplicated appendicitis: an open-label, non-inferiority, randomised  
 9 626 controlled trial, *Lancet* 2011;377:1573-9 doi:10.1016/S0140-6736(11)60410-8.

10

11 627 39 Sippola S, Grönroos J, Tuominen R, et al. Economic evaluation of antibiotic therapy versus  
 12 628 appendicectomy for the treatment of uncomplicated acute appendicitis from the APPAC  
 14 629 randomized clinical trial, *British Journal of Surgery* 2017;104:1355-61 doi:10.1002/bjs.10575.

15

16 630

## 17 631 **Abbreviations**

18

19 632 **AMR:** Antimicrobial resistance

20

21 633 **CRP:** C-reactive protein

22

23 634 **CT:** Computed tomography

24

25 635 **GM:** Gut microbiota

26

27 636 **i.v.:** Intravenous

28

29 637 **MALDI-TOF:** Matrix Assisted Laser Desorption/Ionisation time-of-flight mass spectrometry

30

31 638 **MS:** Mass spectrometry

32

33 639 **NGS:** Next generation sequencing

34

35 640 **p.o.:** Per os

36

37 641 **SPIRIT:** Standard Protocol Items: recommendations for Interventional Trials

38

39 642 **VAP-1:** Vascular adhesion protein-1

40

41 643 **VAS:** Visual analogue scale

42

43 644

44

45 645

## 46 646 **FIGURE LEGENDS**

47

48 647 Figure 1. The synergy between MAPPAC, APPAC II and APPAC III studies.

49

50 648 Figure 2. Flow chart of the study protocol

51

52 649

53 650

54 651

55

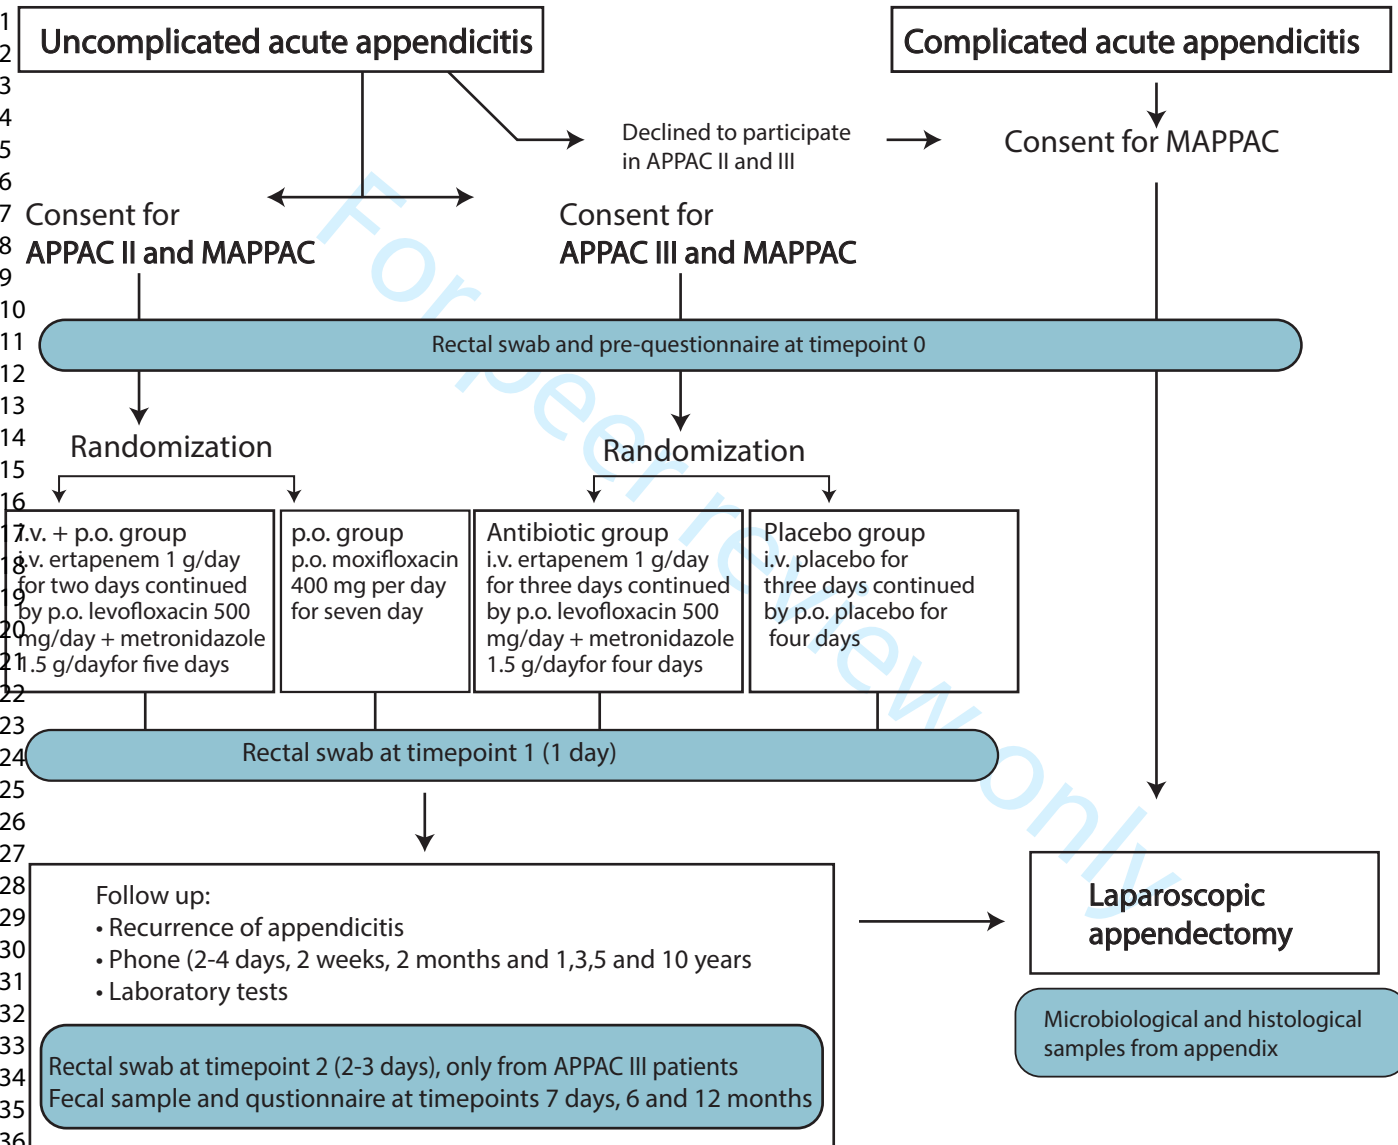

1  
2  
3  
4  
5  
6  
7  
8  
9  
10  
11  
12  
13  
14  
15  
16  
17  
18  
19  
20  
21  
22  
23  
24  
25  
26  
27  
28  
29  
30  
31  
32  
33  
34  
35  
36  
37  
38  
39  
40  
41  
42  
43  
44  
45  
46  
47  
48  
49  
50  
51  
52  
53  
54  
55  
56  
57  
58  
59  
60

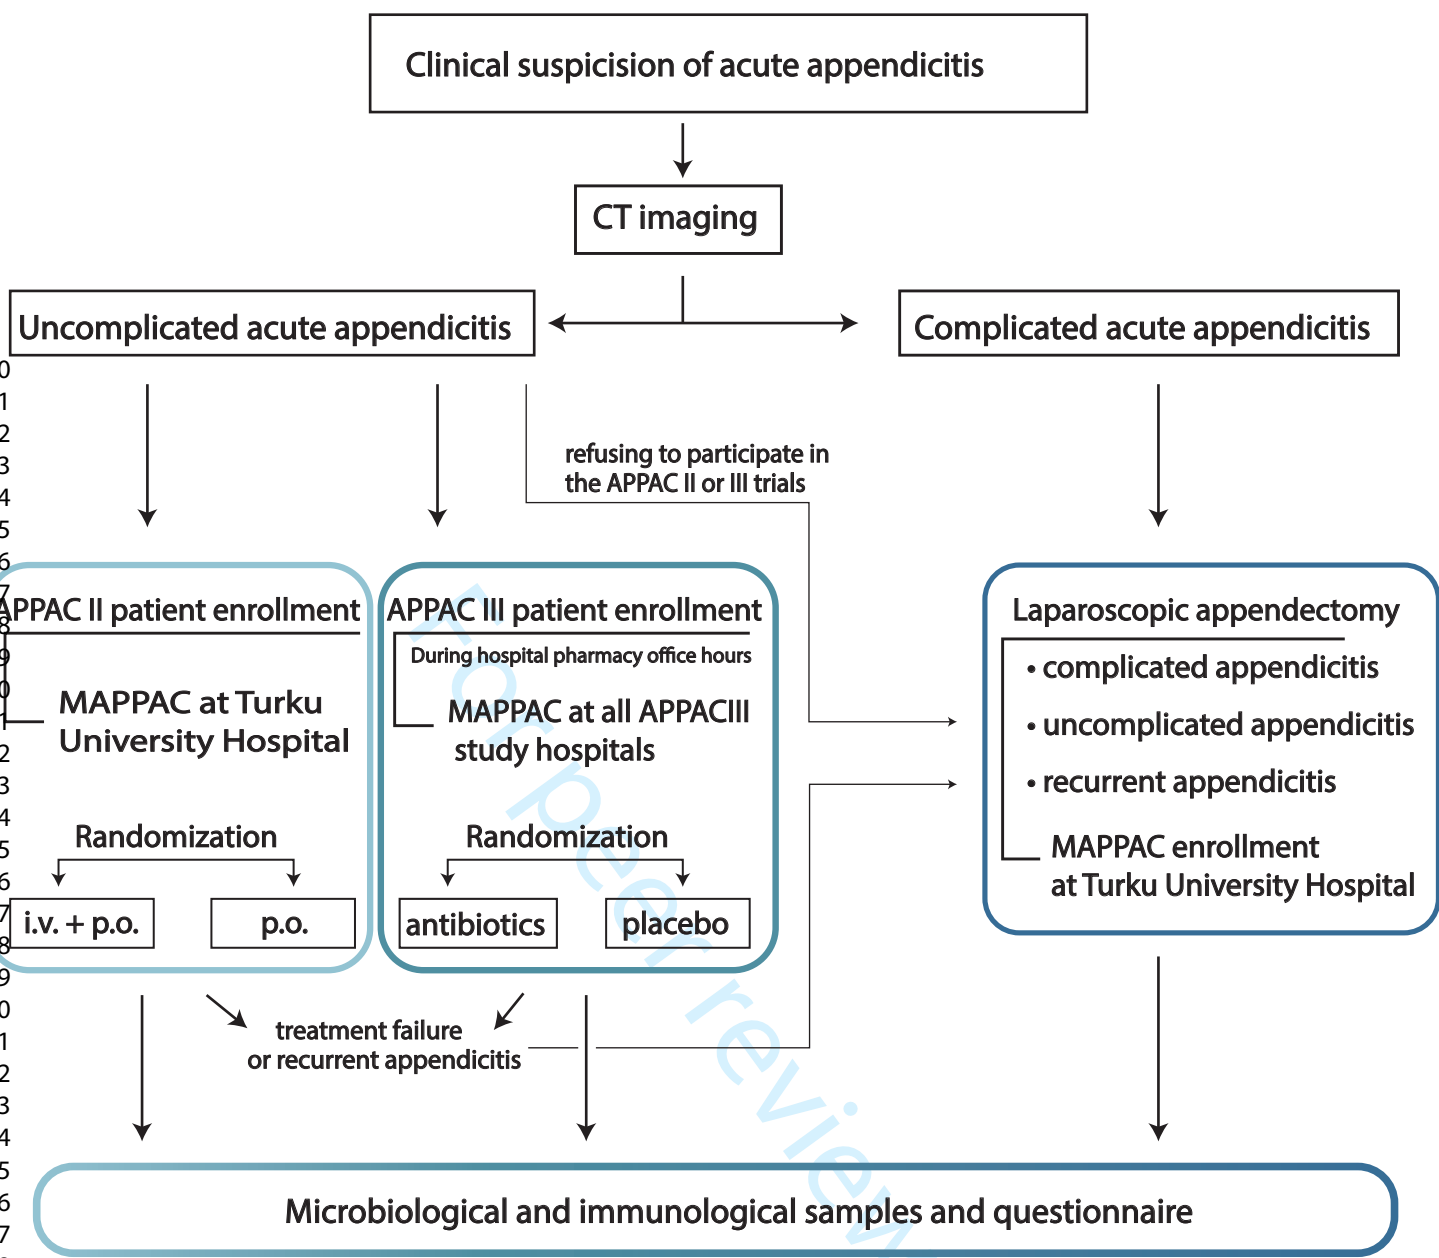

## SUPPLEMENTARY FILE

### Laboratory methods

#### DNA extraction and analysis

##### Stool samples and rectal and appendiceal swabs

Bacterial DNA from rectal and appendiceal swabs and faecal samples are extracted with semiautomated DNA extraction kit together with NorDiag Arrow extraction instrument (Diasorin). The following sample preparation is undertaken before the extraction: 500 µl of the sample is added to 700 µl of stool stabilizer in a 1.4 mm Ceramic Powerbead Tube (Qiagen, Hilden, Germany) and homogenized with MO BIO PowerLyzer 24 Bench Top Bead-Based Homogenizer (MO BIO Laboratories, Inc., USA) at 1000 rpm for 3 minutes followed by centrifugation at 5000 x g for 5 minutes and 600 µl of the supernatant is transferred into a new tube, the centrifugation is repeated and 500 µl of the supernatant is transferred into a new tube. This pretreatment is followed by the DNA extraction, which is performed according to the manufacturer's instructions.

**Appendiceal biopsy:** Microbiological DNA is extracted from appendix biopsy stored in RNAlater with semiautomated DNA extraction kit using NorDiag Arrow extraction instrument. At first RNA later is removed by centrifugation and the pellet is resuspended into ultrapure water. Subsequently, the resuspension containing also the biopsy is treated with proteinase K in thermomixer. From the resulting solution DNA extraction is carried out according to manufacturer's instructions.

The concentration of eluted DNA from all sample types is measured with Qubit dsDNA HS or BR assay kit (Thermo Fisher Scientific) using Qubit fluorometer (Life Technologies, Carlsbad, California, USA). DNA is divided into two aliquots and stored at -75°C for later analysis. Microbial

1  
2  
3 profile of samples will be analysed with NGS approach using appropriate methods and Illumina  
4  
5 Miseq system.  
6  
7  
8  
9

### 10 **Analyses of metagenome, transcriptome and proteome from appendiceal biopsy**

11  
12 Total RNA and proteins from the appendiceal biopsy are extracted with appropriate methods.  
13  
14 Transcriptome and metagenome are analysed with Illumina Hiseq system. In addition, the  
15  
16 expression of specific genes is quantified with quantitative real-time PCR. Proteome is  
17  
18 characterized using mass spectrometry-based methods with qualitative and quantitative  
19  
20 approach.  
21  
22  
23  
24  
25

### 26 **Culture methods**

27  
28 Appendiceal swabs are cultured with both aerobic and anaerobic culture methods. For aerobic  
29  
30 culture the following growth media are used: CHROMagar Orientation (Becton Dickinson,  
31  
32 Franklin Lakes, New Jersey, USA), Trypticase soy agar with 5% sheep blood (Becton Dickinson),  
33  
34 Yersinia selective agar and Streptococcus selective agar (in house production). If the  
35  
36 appendectomy is performed during the office hours, an additional anaerobic culture is made in  
37  
38 connection with the sample collection. Samples for anaerobic culturing are collected with a sterile  
39  
40 cotton swab from the appendix and cultured for fastidious anaerobe agar with blood (FAA) and  
41  
42 kanamycin-vancomycin laked blood agar (KVLB) (both in house production), which are  
43  
44 immediately transferred into anaerobic jar with anaerobic gas generating sachet (Anaerogen 3,5  
45  
46 l, Thermo Fisher Scientific).  
47  
48  
49  
50  
51  
52  
53  
54  
55  
56  
57  
58  
59  
60



1  
2  
3 Cultures are incubated at +35 °C for 18-24 hours. Morphologically distinct colonies are  
4  
5 subcultured until a pure culture is obtained. Isolated species are frozen in a mixture of skim milk  
6  
7 and glycerol at -75 °C.  
8  
9

### 12 **MALDI-TOF mass spectrometry**

14  
15 The identification of isolated bacteria is done with Bruker matrix-assisted laser  
16  
17 desorption/ionisation time-of-flight mass spectrometry (MALDI-TOF MS). Isolates are inoculated  
18  
19 and cultured for 18-48 hours at +35 °C before the analysis. For the analysis, colony is applied  
20  
21 either directly or through ethanol/formic acid extraction on a steel plate and HCCA matrix ( $\alpha$ -  
22  
23 cyano-4-hydroxycinnamic acid in 50% acetonitrile-2.5% trifluoroacetic acid (Bruker Daltonics,  
24  
25 Bremen, Germany)) is added according to the manufacturer's instructions. The identification is  
26  
27 done using Microflex LT instrument and MALDI Biotyper software (Bruker Daltonics). If isolates  
28  
29 cannot be identified due to the absence of reference peaks in the database, the isolate is identified  
30  
31 with sequencing the 16S rRNA gene.  
32  
33  
34  
35  
36  
37

### 38 **Antimicrobial susceptibility testing**

39  
40 Phenotypic antimicrobial susceptibility testing for the isolated aerobic and anaerobic bacteria is  
41  
42 performed by disk diffusion and MIC methods, according to the European Committee on  
43  
44 Antimicrobial Susceptibility Testing (EUCAST) guidelines. For certain bacteria, the Clinical and  
45  
46 Laboratory Standards Institute (CLSI) guidelines can be used.  
47  
48

49  
50 Further molecular analysis for antimicrobial resistance or virulence genes using e.g., PCR, Sanger  
51  
52 sequencing and whole genome sequencing (WGS) are also performed for selected isolates.  
53  
54

### 55 **Appendicolith analysis**

1  
2  
3 Appendicoliths are assessed both on the surface and cross-sectional morphology. Based on the  
4 morphological characteristics and a degree of hardness, all appendicoliths will be classified. The  
5  
6 morphological characteristics and a degree of hardness, all appendicoliths will be classified. The  
7  
8 composition of selected appendicoliths are analysed with physical and chemical methods.  
9

## 10 11 12 **Immunological analysis**

13  
14  
15 The appendiceal biopsies are analysed immunohistochemically by determining the presence of  
16  
17 different cell types and blood vessel surface markers. Neutrophils, leukocytes and monocytes will  
18  
19 be analysed and special interest will be focused on lymphocyte subtypes (i.e., CD4/CD8 and more  
20  
21 detailed subgroup analyses such as regulatory T cells) and monocyte markers (i.e., macrophage  
22  
23 M1/M2 / receptor MHCII). Moreover, certain inflammation induced markers on endothelium such  
24  
25 as VAP-1, E-selectin and P-selectin will be evaluated. In order to compare possible differences  
26  
27 between patients with successful antibiotic therapy to patients with failed antibiotic therapy or  
28  
29 complicated acute appendicitis the serum samples will be screened to identify possible inflammatory  
30  
31 or immunological markers for identifying the different forms of the disease. Cytokines, chemokines  
32  
33 and growth factors will be tested using Bio-Plex Pro Human Cytokine 48-Plex Screening Panel (BIO-  
34  
35 RAD) containing the following analytes: Basic FGF, CTACK, eotaxin, G-CSF, GM-CSF, GRO-a, HGF,  
36  
37 ICAM-1, IFN-a2, IFN-g, IL-1a, IL-1b, IL-1ra, IL-2, IL-2Ra, IL-3, IL-4, IL-5, IL-6, IL-7, IL-8, IL-9, IL-10, IL-  
38  
39 12 (p40), IL-12 (p70), IL-13, IL-15, IL-16, IL-17A, IL-18, IP-10, LIF, MCP-1 (MCAF), MCP-3, M-CSF, MIF,  
40  
41 MIG, MIP-1a, MIP-1b, b-NGF, PDGF-BB, RANTES, SCF, SCGF-b, SDF-1a, TNF-a, TNF-b, TRAIL, VCAM-1  
42  
43 and VEGF-A. Moreover, we will use in house analyses to measure soluble VAP-1 (inflammatory) and  
44  
45 CD73 (anti-inflammatory). In addition, metabolomics approach using nuclear magnetic resonance  
46  
47 (NMR) spectroscopy and liquid chromatography-mass spectrometry (LC-MS) metabolomics  
48  
49 platforms will be used for biomarker analysis. The results obtained from immunological analyses will  
50  
51 be correlated to the clinical parameters and to the microbiological findings.  
52  
53  
54  
55  
56  
57  
58  
59  
60

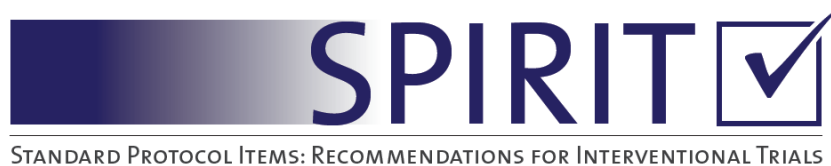

STANDARD PROTOCOL ITEMS: RECOMMENDATIONS FOR INTERVENTIONAL TRIALS

SPIRIT 2013 Checklist: Recommended items to address in a clinical trial protocol and related documents\*

| Section/item                      | Item No | Description                                                                                                                                                                                                                                                                              | Page Number on which item is reported |
|-----------------------------------|---------|------------------------------------------------------------------------------------------------------------------------------------------------------------------------------------------------------------------------------------------------------------------------------------------|---------------------------------------|
| <b>Administrative information</b> |         |                                                                                                                                                                                                                                                                                          |                                       |
| Title                             | 1       | Descriptive title identifying the study design, population, interventions, and, if applicable, trial acronym                                                                                                                                                                             | 1                                     |
| Trial registration                | 2a      | Trial identifier and registry name. If not yet registered, name of intended registry                                                                                                                                                                                                     | 3                                     |
|                                   | 2b      | All items from the World Health Organization Trial Registration Data Set                                                                                                                                                                                                                 | n/a                                   |
| Protocol version                  | 3       | Date and version identifier                                                                                                                                                                                                                                                              | n/a                                   |
| Funding                           | 4       | Sources and types of financial, material, and other support                                                                                                                                                                                                                              | 22                                    |
| Roles and responsibilities        | 5a      | Names, affiliations, and roles of protocol contributors                                                                                                                                                                                                                                  | 1,22                                  |
|                                   | 5b      | Name and contact information for the trial sponsor                                                                                                                                                                                                                                       | 1                                     |
|                                   | 5c      | Role of study sponsor and funders, if any, in study design; collection, management, analysis, and interpretation of data; writing of the report; and the decision to submit the report for publication, including whether they will have ultimate authority over any of these activities | 22                                    |
|                                   | 5d      | Composition, roles, and responsibilities of the coordinating centre, steering committee, endpoint adjudication committee, data management team, and other individuals or groups overseeing the trial, if applicable (see Item 21a for data monitoring committee)                         | 7-8                                   |
| <b>Introduction</b>               |         |                                                                                                                                                                                                                                                                                          |                                       |

|                                                           |     |                                                                                                                                                                                                                                                                                                                                                                                |           |
|-----------------------------------------------------------|-----|--------------------------------------------------------------------------------------------------------------------------------------------------------------------------------------------------------------------------------------------------------------------------------------------------------------------------------------------------------------------------------|-----------|
| Background and rationale                                  | 6a  | Description of research question and justification for undertaking the trial, including summary of relevant studies (published and unpublished) examining benefits and harms for each intervention                                                                                                                                                                             | 5-7       |
|                                                           | 6b  | Explanation for choice of comparators                                                                                                                                                                                                                                                                                                                                          | 6-7       |
| Objectives                                                | 7   | Specific objectives or hypotheses                                                                                                                                                                                                                                                                                                                                              | 7         |
| Trial design                                              | 8   | Description of trial design including type of trial (eg, parallel group, crossover, factorial, single group), allocation ratio, and framework (eg, superiority, equivalence, noninferiority, exploratory)                                                                                                                                                                      | 7         |
| <b>Methods: Participants, interventions, and outcomes</b> |     |                                                                                                                                                                                                                                                                                                                                                                                |           |
| Study setting                                             | 9   | Description of study settings (eg, community clinic, academic hospital) and list of countries where data will be collected. Reference to where list of study sites can be obtained                                                                                                                                                                                             | 8         |
| Eligibility criteria                                      | 10  | Inclusion and exclusion criteria for participants. If applicable, eligibility criteria for study centres and individuals who will perform the interventions (eg, surgeons, psychotherapists)                                                                                                                                                                                   | 9-11      |
| Interventions                                             | 11a | Interventions for each group with sufficient detail to allow replication, including how and when they will be administered                                                                                                                                                                                                                                                     | 11-12     |
|                                                           | 11b | Criteria for discontinuing or modifying allocated interventions for a given trial participant (eg, drug dose change in response to harms, participant request, or improving/worsening disease)                                                                                                                                                                                 | 14        |
|                                                           | 11c | Strategies to improve adherence to intervention protocols, and any procedures for monitoring adherence (eg, drug tablet return, laboratory tests)                                                                                                                                                                                                                              | 14-15, 17 |
|                                                           | 11d | Relevant concomitant care and interventions that are permitted or prohibited during the trial                                                                                                                                                                                                                                                                                  | n/a       |
| Outcomes                                                  | 12  | Primary, secondary, and other outcomes, including the specific measurement variable (eg, systolic blood pressure), analysis metric (eg, change from baseline, final value, time to event), method of aggregation (eg, median, proportion), and time point for each outcome. Explanation of the clinical relevance of chosen efficacy and harm outcomes is strongly recommended | 15-16     |

|                                                                     |     |                                                                                                                                                                                                                                                                                                                                                          |                 |
|---------------------------------------------------------------------|-----|----------------------------------------------------------------------------------------------------------------------------------------------------------------------------------------------------------------------------------------------------------------------------------------------------------------------------------------------------------|-----------------|
| Participant timeline                                                | 13  | Time schedule of enrolment, interventions (including any run-ins and washouts), assessments, and visits for participants. A schematic diagram is highly recommended (see Figure)                                                                                                                                                                         | 12-15, figure 2 |
| Sample size                                                         | 14  | Estimated number of participants needed to achieve study objectives and how it was determined, including clinical and statistical assumptions supporting any sample size calculations                                                                                                                                                                    | 16, n/a         |
| Recruitment                                                         | 15  | Strategies for achieving adequate participant enrolment to reach target sample size                                                                                                                                                                                                                                                                      | 11, 17          |
| <b>Methods: Assignment of interventions (for controlled trials)</b> |     |                                                                                                                                                                                                                                                                                                                                                          |                 |
| Allocation:                                                         |     |                                                                                                                                                                                                                                                                                                                                                          | n/a             |
| Sequence generation                                                 | 16a | Method of generating the allocation sequence (eg, computer-generated random numbers), and list of any factors for stratification. To reduce predictability of a random sequence, details of any planned restriction (eg, blocking) should be provided in a separate document that is unavailable to those who enrol participants or assign interventions | n/a             |
| Allocation concealment mechanism                                    | 16b | Mechanism of implementing the allocation sequence (eg, central telephone; sequentially numbered, opaque, sealed envelopes), describing any steps to conceal the sequence until interventions are assigned                                                                                                                                                | n/a             |
| Implementation                                                      | 16c | Who will generate the allocation sequence, who will enrol participants, and who will assign participants to interventions                                                                                                                                                                                                                                | n/a             |
| Blinding (masking)                                                  | 17a | Who will be blinded after assignment to interventions (eg, trial participants, care providers, outcome assessors, data analysts), and how                                                                                                                                                                                                                | n/a             |
|                                                                     | 17b | If blinded, circumstances under which unblinding is permissible, and procedure for revealing a participant's allocated intervention during the trial                                                                                                                                                                                                     | n/a             |
| <b>Methods: Data collection, management, and analysis</b>           |     |                                                                                                                                                                                                                                                                                                                                                          |                 |

|                                                          |                            |     |                                                                                                                                                                                                                                                                                                                                                                                                              |                               |
|----------------------------------------------------------|----------------------------|-----|--------------------------------------------------------------------------------------------------------------------------------------------------------------------------------------------------------------------------------------------------------------------------------------------------------------------------------------------------------------------------------------------------------------|-------------------------------|
| 1<br>2<br>3<br>4<br>5<br>6<br>7<br>8<br>9<br>10<br>11    | Data collection methods    | 18a | Plans for assessment and collection of outcome, baseline, and other trial data, including any related processes to promote data quality (eg, duplicate measurements, training of assessors) and a description of study instruments (eg, questionnaires, laboratory tests) along with their reliability and validity, if known. Reference to where data collection forms can be found, if not in the protocol | 12-17, supplementary material |
| 12<br>13<br>14<br>15<br>16<br>17                         |                            | 18b | Plans to promote participant retention and complete follow-up, including list of any outcome data to be collected for participants who discontinue or deviate from intervention protocols                                                                                                                                                                                                                    | 17                            |
| 18<br>19<br>20<br>21<br>22<br>23<br>24<br>25             | Data management            | 19  | Plans for data entry, coding, security, and storage, including any related processes to promote data quality (eg, double data entry; range checks for data values). Reference to where details of data management procedures can be found, if not in the protocol                                                                                                                                            | 18                            |
| 26<br>27<br>28<br>29<br>30<br>31                         | Statistical methods        | 20a | Statistical methods for analysing primary and secondary outcomes. Reference to where other details of the statistical analysis plan can be found, if not in the protocol                                                                                                                                                                                                                                     | 16                            |
| 32<br>33<br>34                                           |                            | 20b | Methods for any additional analyses (eg, subgroup and adjusted analyses)                                                                                                                                                                                                                                                                                                                                     | 17                            |
| 35<br>36<br>37<br>38<br>39<br>40                         |                            | 20c | Definition of analysis population relating to protocol non-adherence (eg, as randomised analysis), and any statistical methods to handle missing data (eg, multiple imputation)                                                                                                                                                                                                                              | n/a                           |
| 41<br>42                                                 | <b>Methods: Monitoring</b> |     |                                                                                                                                                                                                                                                                                                                                                                                                              |                               |
| 43<br>44<br>45<br>46<br>47<br>48<br>49<br>50<br>51<br>52 | Data monitoring            | 21a | Composition of data monitoring committee (DMC); summary of its role and reporting structure; statement of whether it is independent from the sponsor and competing interests; and reference to where further details about its charter can be found, if not in the protocol. Alternatively, an explanation of why a DMC is not needed                                                                        | 22                            |
| 53<br>54<br>55<br>56<br>57<br>58<br>59<br>60             |                            | 21b | Description of any interim analyses and stopping guidelines, including who will have access to these interim results and make the final decision to terminate the trial                                                                                                                                                                                                                                      | n/a                           |

|                                 |     |                                                                                                                                                                                                                                                                                     |        |
|---------------------------------|-----|-------------------------------------------------------------------------------------------------------------------------------------------------------------------------------------------------------------------------------------------------------------------------------------|--------|
| Harms                           | 22  | Plans for collecting, assessing, reporting, and managing solicited and spontaneously reported adverse events and other unintended effects of trial interventions or trial conduct                                                                                                   | 17, 18 |
| Auditing                        | 23  | Frequency and procedures for auditing trial conduct, if any, and whether the process will be independent from investigators and the sponsor                                                                                                                                         | n/a    |
| <b>Ethics and dissemination</b> |     |                                                                                                                                                                                                                                                                                     |        |
| Research ethics approval        | 24  | Plans for seeking research ethics committee/institutional review board (REC/IRB) approval                                                                                                                                                                                           | 18     |
| Protocol amendments             | 25  | Plans for communicating important protocol modifications (eg, changes to eligibility criteria, outcomes, analyses) to relevant parties (eg, investigators, REC/IRBs, trial participants, trial registries, journals, regulators)                                                    | n/a    |
| Consent or assent               | 26a | Who will obtain informed consent or assent from potential trial participants or authorised surrogates, and how (see Item 32)                                                                                                                                                        | 8-9    |
|                                 | 26b | Additional consent provisions for collection and use of participant data and biological specimens in ancillary studies, if applicable                                                                                                                                               | 9, 18  |
| Confidentiality                 | 27  | How personal information about potential and enrolled participants will be collected, shared, and maintained in order to protect confidentiality before, during, and after the trial                                                                                                | 18     |
| Declaration of interests        | 28  | Financial and other competing interests for principal investigators for the overall trial and each study site                                                                                                                                                                       | 22     |
| Access to data                  | 29  | Statement of who will have access to the final trial dataset, and disclosure of contractual agreements that limit such access for investigators                                                                                                                                     | 18     |
| Ancillary and post-trial care   | 30  | Provisions, if any, for ancillary and post-trial care, and for compensation to those who suffer harm from trial participation                                                                                                                                                       | n/a    |
| Dissemination policy            | 31a | Plans for investigators and sponsor to communicate trial results to participants, healthcare professionals, the public, and other relevant groups (eg, via publication, reporting in results databases, or other data sharing arrangements), including any publication restrictions | 18     |

|                            |     |                                                                                                                                                                                                |                               |
|----------------------------|-----|------------------------------------------------------------------------------------------------------------------------------------------------------------------------------------------------|-------------------------------|
|                            | 31b | Authorship eligibility guidelines and any intended use of professional writers                                                                                                                 | n/a                           |
|                            | 31c | Plans, if any, for granting public access to the full protocol, participant-level dataset, and statistical code                                                                                | n/a                           |
| <b>Appendices</b>          |     |                                                                                                                                                                                                |                               |
| Informed consent materials | 32  | Model consent form and other related documentation given to participants and authorised surrogates                                                                                             | in finnish only               |
| Biological specimens       | 33  | Plans for collection, laboratory evaluation, and storage of biological specimens for genetic or molecular analysis in the current trial and for future use in ancillary studies, if applicable | 12-15, supplementary material |

\*It is strongly recommended that this checklist be read in conjunction with the SPIRIT 2013 Explanation & Elaboration for important clarification on the items. Amendments to the protocol should be tracked and dated. The SPIRIT checklist is copyrighted by the SPIRIT Group under the Creative Commons "[Attribution-NonCommercial-NoDerivs 3.0 Unported](https://creativecommons.org/licenses/by-nc-nd/3.0/)" license.
